# Supplementary material
Source: PubMed Central journal article supplement (PMC3045477)
Supplement: NIHMS272069-supplement-3_si_003.pdf [file NIHMS272069-supplement-3_si_003.pdf]

# Supporting Information

## Fungal Indole Alkaloid Biosynthesis: Genetic and Biochemical Investigation of Tryptoquialanine Pathway

*Xue Gao,<sup>1</sup> Yit-Heng Chooi,<sup>1</sup> Brian D. Ames,<sup>2</sup> Peng Wang,<sup>1</sup> Christopher T. Walsh<sup>2</sup> and Yi Tang<sup>1\*</sup>*

<sup>1</sup> Department of Chemical and Biomolecular Engineering, Department of Chemistry and Biochemistry, University of California Los Angeles, 420 Westwood Plaza, Los Angeles, CA 90095.

<sup>2</sup> Department of Biological Chemistry & Molecular Pharmacology, Harvard Medical School, 240 Longwood Avenue, Boston, MA 02115.

Email: [yitang@ucla.edu](mailto:yitang@ucla.edu)

# Table of Contents

|                                                                                                                                                                                                                        |     |
|------------------------------------------------------------------------------------------------------------------------------------------------------------------------------------------------------------------------|-----|
| <b>Supplementary Methods</b>                                                                                                                                                                                           | S3  |
| <b>Table S1.</b> Domain architectures of putative NRPSs in <i>P.aethiopicum</i> and comparison to the closest homologs in <i>A.clavatus</i> and <i>P. chrysogenum</i> .                                                | S5  |
| <b>Table S2.</b> Sequences of primers used in this paper.                                                                                                                                                              | S6  |
| <b>Table S3</b> NMR Data of <b>1</b> and <b>20</b> in DMSO- <i>d</i> <sub>6</sub> .                                                                                                                                    | S8  |
| <b>Table S4</b> NMR Data of <b>14</b> in CDCl <sub>3</sub> .                                                                                                                                                           | S9  |
| <b>Table S5</b> NMR Data of <b>18</b> and <b>19</b> in DMSO- <i>d</i> <sub>6</sub> .                                                                                                                                   | S10 |
| <b>Table S6</b> NMR Data of <b>24</b> and <b>25</b> in DMSO- <i>d</i> <sub>6</sub> .                                                                                                                                   | S11 |
| <b>Table S7</b> NMR Data of <b>28</b> in DMSO- <i>d</i> <sub>6</sub> .                                                                                                                                                 | S12 |
| <b>Figure S1</b> PCR verification of PaeNRPS1275 transformants as an example to the genetic knockout procedures.                                                                                                       | S13 |
| <b>Figure S2</b> HPLC traces of metabolic extracts from $\Delta orf4$ , $\Delta orf5$ , $\Delta orf6$ single gene deletion strains.                                                                                    | S14 |
| <b>Figure S3</b> Corresponding <i>tqa</i> homologs in <i>A. clavatus</i> NRRL1 and <i>A. fumigatus</i> Af293; domain architecture and sequence similarity of TqaA, TqvA and FqaA.                                      | S15 |
| <b>Figure S4</b> Biochemical characterizations of TqaD.                                                                                                                                                                | S16 |
| <b>Figure S5</b> Substrate binding pocket comparison of the A-domains of TqaB and Af12050.                                                                                                                             | S17 |
| <b>Figure S6</b> Spectroscopic Analysis of <b>1</b> : UV and Mass; <sup>1</sup> H; <sup>13</sup> C; <sup>1</sup> H- <sup>1</sup> H COSY; <sup>1</sup> H- <sup>13</sup> C HMQC; <sup>1</sup> H- <sup>13</sup> C HMBC.   | S18 |
| <b>Figure S7</b> Spectroscopic Analysis of <b>14</b> : UV and Mass; <sup>1</sup> H; <sup>13</sup> C; <sup>1</sup> H- <sup>1</sup> H COSY; <sup>1</sup> H- <sup>13</sup> C HMQC; <sup>1</sup> H- <sup>13</sup> C HMBC.  | S24 |
| <b>Figure S8</b> Spectroscopic Analysis of <b>15</b> : UV and Mass.                                                                                                                                                    | S30 |
| <b>Figure S9</b> Spectroscopic Analysis of <b>18</b> : UV and Mass; <sup>1</sup> H; <sup>13</sup> C; <sup>1</sup> H- <sup>1</sup> H COSY; <sup>1</sup> H- <sup>13</sup> C HMQC; <sup>1</sup> H- <sup>13</sup> C HMBC.  | S31 |
| <b>Figure S10</b> Spectroscopic Analysis of <b>19</b> : UV and Mass; <sup>1</sup> H; <sup>13</sup> C; <sup>1</sup> H- <sup>1</sup> H COSY; <sup>1</sup> H- <sup>13</sup> C HMQC; <sup>1</sup> H- <sup>13</sup> C HMBC. | S37 |
| <b>Figure S11</b> Spectroscopic Analysis of <b>20</b> : UV and Mass; <sup>1</sup> H; <sup>13</sup> C; <sup>1</sup> H- <sup>1</sup> H COSY; <sup>1</sup> H- <sup>13</sup> C HMQC; <sup>1</sup> H- <sup>13</sup> C HMBC. | S43 |
| <b>Figure S12</b> Spectroscopic Analysis of <b>23</b> : UV and Mass.                                                                                                                                                   | S49 |
| <b>Figure S13</b> Spectroscopic Analysis of <b>24</b> : UV and Mass; <sup>1</sup> H; <sup>13</sup> C; <sup>1</sup> H- <sup>1</sup> H COSY; <sup>1</sup> H- <sup>13</sup> C HMQC; <sup>1</sup> H- <sup>13</sup> C HMBC. | S50 |
| <b>Figure S14</b> Spectroscopic Analysis of <b>25</b> : UV and Mass; <sup>1</sup> H; <sup>13</sup> C; <sup>1</sup> H- <sup>1</sup> H COSY; <sup>1</sup> H- <sup>13</sup> C HMQC; <sup>1</sup> H- <sup>13</sup> C HMBC. | S56 |
| <b>Figure S15</b> Spectroscopic Analysis of <b>26</b> : UV and Mass.                                                                                                                                                   | S62 |
| <b>Figure S16</b> Spectroscopic Analysis of <b>27</b> : UV and Mass.                                                                                                                                                   | S63 |
| <b>Figure S17</b> Spectroscopic Analysis of <b>28</b> : UV and Mass; <sup>1</sup> H; <sup>13</sup> C; <sup>1</sup> H- <sup>1</sup> H COSY; <sup>1</sup> H- <sup>13</sup> C HMQC; <sup>1</sup> H- <sup>13</sup> C HMBC. | S64 |
| <b>Figure S18</b> Spectroscopic Analysis of <b>29</b> : UV and Mass.                                                                                                                                                   | S70 |
| <b>Figure S19</b> Spectroscopic Analysis of <b>30</b> : UV and Mass.                                                                                                                                                   | S71 |
| <b>Supplementary reference</b>                                                                                                                                                                                         | S72 |

## SUPPLEMENTAL METHODS

### X-ray Crystallographic data collection

A colorless platelet-like crystal of **1**, approximate dimensions .40mm x .20mm x .10 mm, was used for intensity data. The diffraction data were measured at room temperature on a Bruker SMART Apex2 CCD-based X-ray diffractometer system equipped with a Mo-K $\alpha$  radiation ( $\lambda = 0.71073 \text{ \AA}$ ). The detector was placed at a distance of 6.00 cm from the crystal. A total of 1798 frames were collected with a scan width of  $0.5^\circ$  in  $\omega$ , with an exposure time of 30 sec./frame. The frames were integrated with the Bruker SAINT software package using a narrow-frame integration algorithm.<sup>1a</sup> The integration of the data using a orthorhombic unit cell yielded a total of 29867 reflections to a maximum  $2\theta$  angle of  $56.64^\circ$ , of which 3665 were independent ( $R_{\text{int}} = 5.3\%$ ). The final cell constants of  $a = 14.158 (10) \text{ \AA}$ ,  $b = 21.005 (14) \text{ \AA}$ ,  $c = 21.005 (12) \text{ \AA}$ ,  $V = 5453(6) \text{ \AA}^3$ , are based upon the refinement of the XYZ centroids of 6528 reflections. The structure was solved and refined using the Bruker SHELXTL (Version 6.14) Software Package,<sup>1b</sup> in the space group  $C222_1$ . The absolute configuration of **1** was fixed based on the possible  $R$  configuration at C12 position and is consistent with the crystal structure of **4** established by X-ray crystallography.<sup>2</sup> All atoms were refined anisotropically and hydrogen atoms were placed at the calculated positions. The final anisotropic full-matrix least-squares refinement on  $F^2$  converged at  $R_1 = 4.091\%$ ,  $wR_2 = 16.55\%$  and a goodness-of-fit of 1.042.

A colorless needle -like crystal of **18**, approximate dimensions .12mm x .02mm x .02 mm, was used for intensity data. The diffraction data were measured at 100K on a Bruker SMART Apex2 CCD-based X-ray diffractometer system equipped with a Mo-K $\alpha$  radiation ( $\lambda = 0.71073 \text{ \AA}$ ). The detector was placed at a distance of 6.00 cm from the crystal. A total of 1798 frames were collected with a scan width of  $0.5^\circ$  in  $\omega$ , with an exposure time of 120 sec./frame. The frames were integrated with the Bruker SAINT software package using a narrow-frame integration algorithm.<sup>1a</sup> The integration of the data using a hexagonal unit cell yielded a total of 41893 reflections to a maximum  $2\theta$  angle of  $52.72^\circ$ . The final cell constants of  $a = 21.974 (10) \text{ \AA}$ ,  $c = 10.8958 (12) \text{ \AA}$ ,  $V = 4556(6) \text{ \AA}^3$ , are based upon the refinement of the XYZ centroids of 5907 reflections. The structure

was solved and refined using the Bruker SHELXTL (Version 6.14) Software Package,<sup>1b</sup> in the space group P6<sub>3</sub>. The absolute configuration of **18** was fixed based on the possible *S* configuration at C27 position and *R* configuration at C12 position and is consistent with incorporation of L-Ala and D-tryptophan moieties. All atoms were refined anisotropically and hydrogen atoms were placed at the calculated positions. The final anisotropic full-matrix least-squares refinement on F<sup>2</sup> converged at R<sub>1</sub> = 7.03%, wR<sub>2</sub> = 17.13% and a goodness-of-fit of 1.082.

- (1) a) Saint version 7.68 (2009), Bruker AXS Inc., Madison, WI (USA)  
b) Shelxtl version 6.14 (2000), Sheldrick, Bruker AXS Inc., Madison, WI (USA)
- (2) Springer, J. P. *Tetrahedron Lett.* 1979, 339.

**Table S1** Domain architectures of putative NRPSs in *P.aethiopicum* and comparison to the closest homologs in *A.clavatus* and *P. chrysogenum*

|           | Contig No.  | Contig length | Location        | NRPS Length (aa) | Domains                           | Closest homolog in BlastP          | Closest <i>P. chrysogenum</i> homolog | Closest <i>A. clavatus</i> homolog |
|-----------|-------------|---------------|-----------------|------------------|-----------------------------------|------------------------------------|---------------------------------------|------------------------------------|
| <b>1</b>  | contig00857 | 73656         | 6614-13830      | 2368             | A-T-C-A-T-C                       | Pc21g15480 (87%)                   | Pc21g15480 (87%)                      | ACLA_059530 (31%)                  |
| <b>2</b>  | contig01275 | 41088         | 37-12346        | 4074             | C*A-T-C-A-T-E-C-A-T-C             | ACLA_017890 (63%)                  | Pc13g14330 (33%)                      | ACLA_017890 (63%)                  |
| <b>3</b>  | contig00865 | 23983         | 10454-23163     | 4209             | C-A-T-C-A-T-C-A-T-C               | Pc13g14330 (53%)                   | Pc13g14330 (53%)                      | ACLA_059530(45%)                   |
| <b>4</b>  | contig00311 | 157072        | 142932-149218   | 2082             | A-T-C-A-T-C                       | Pc22g20400 (94%)                   | Pc22g20400 (94%)                      | AFLA_010620 (68%)                  |
| <b>5</b>  | contig00107 | 69917         | 32541-38452     | 1921             | A-T-C-A-T-C                       | Pc16g03850 (93%)                   | Pc16g03850 (93%)                      | ACLA_061000(42%)                   |
| <b>6</b>  | contig00904 | 94631         | 40241-47585     | 2409             | A-T-C-A-T-C                       | Pc21g12630 (84%)                   | Pc21g12630 (84%)                      | ACLA_076770(33%)                   |
| <b>7</b>  | contig00185 | 110569        | 31302-42930     | 3864             | A-T-C-A-T-C                       | NFIA_044240 (83%)                  | Pc21g10790 (31%)                      | ACLA_095980(34%)                   |
| <b>8</b>  | contig00284 | 128491        | 104811-121323   | 5397             | A-T-C-A-T-C-A-C-A-T-C-A-T-C       | AFLA_066720 (54%)                  | Pc21g10790 (30%)                      | ACLA_059530(28%)                   |
| <b>9</b>  | contig00894 | 67132         | 8793-27331      | 6048             | A-T-E-C-A-T-C-A-T-E-C-A-T-C-A-T   | Pc16g04690 (93%)                   | Pc16g04690 (93%)                      | ACLA_025160(57%)                   |
| <b>10</b> | contig00025 | 17604         | 543-13015       | 4102             | A-T-C-A-T-C-A-C                   | ABR23346.1 (32%, partial identity) | Pc21g12630 (31%)                      | ACLA_093780(32%)                   |
| <b>11</b> | contig01022 | 16832         | 9044 - 12370    | 1108             | A-T-C                             | ACLA_017900 (67%)                  | Pc21g10790 (32%)                      | ACLA_017900(67%)                   |
| <b>12</b> | contig01242 | 215775        | 55563 - 58001   | 812              | A                                 | Pc22g22580 (85%)                   | Pc22g22580 (85%)                      | ACLA_093780(30%)                   |
| <b>13</b> | contig01239 | 68878         | 23001 - 25741   | 809              | A                                 | Pc21g12840 (91%)                   | Pc21g12840 (91%)                      | ACLA_098420(32%)                   |
| <b>14</b> | contig00921 | 69917         | 32996 - 36780   | 1215             | A                                 | Pc20g12670 (82%)                   | Pc20g12670 (82%)                      | ACLA_095980(32%)                   |
| <b>15</b> | contig00239 | 135391        | 104823 - 111215 | 2106             | A-T-C-A-T-C                       | Pc21g01710 (94%)                   | Pc21g01710 (94%)                      | ACLA_061190(64%)                   |
| <b>16</b> | contig00759 | 116158        | 26436 - 41994   | 5096             | A-C-A-T-C-A-T-C-A-T-C-A-T-C-A-T-C | Pc13g05250 (89%)                   | Pc13g05250 (89%)                      | ACLA_079690(53%)                   |

The NRPS genes in *P. aethiopicum* were identified from the local genome database using A domains of the acetylaszonalenin synthetase of *Neosartorya fischeri* NRRL 181, which activates an anthranilate and a tryptophan.<sup>2</sup> A total of 16 NRPS genes were found. The strategy for the search of *P. aethiopicum* NRPSs genes responsible for the production of **1** was based on assumptions that 1) PaeNRPSs that are highly similar and orthologous (> 80% identity with identical domain architecture) to those in *P. chrysogenum* are unlikely to produce **1** and thus can be excluded; 2) since the PaeNRPSs for **1** in *P. aethiopicum* and **2** in *A. clavatus* are likely to be close homologs of each other, PaeNRPSs genes that are highly similar to those in *A. clavatus* are good candidates. Combining these two search parameters allow us to narrow down the candidate to two (PaeNRPS1275 and PaeNRPS1022). Incidentally, the homologs of the two NRPSs in *A. clavatus* (ACLA\_17890 and ACLA\_17900) are adjacent to each other in the genome and have a combined total of four modules, correspond to the four amino acid units required to build **1** and **2**. The close similarity of PaeNRPS1275 to the tryptophan- and anthranilate-activating A domains (both 47% identity) of the acetylaszonalenin synthetase of *N. fischeri* NRRL 181 supports that PaeNRPS1275 is a highly plausible candidate.

(2) Yin, W. B.; Grundmann, A.; Cheng, J.; Li, S. M. *J. Biol. Chem.* 2009, 284, 100.

**Table S2** Sequences of primers used in this paper

| <b>Primer</b> | <b>Sequence</b>                                    |
|---------------|----------------------------------------------------|
| tqaAKO_P1     | 5'-AATTCCACCAAGCCCTTACA-3'                         |
| tqaAKO_P2     | 5'-ATGACGGTCCAATCTCTCGA-3'                         |
| tqaAKO_P3     | 5'-GCCCGTCACCGAGATTTAGGGTCCTGCCTCCAAGCAGGCG-3'     |
| tqaAKO_P4     | 5'-CAATATCATCTTCTGTGCGACGTCGCCGAGTAAAAGCCCGT-3'    |
| tqaAKO_P5     | 5'-GATCAAGTTTGTGCTTGCCG-3'                         |
| tqaAKO_P6     | 5'-AATTAGATTTACCGCAGTCA-3'                         |
| tqaBKO_P1     | 5'-AAACCATAAAAATCAATTGGA-3'                        |
| tqaBKO_P2     | 5'-ATTTTCAACCCACGAGACAA-3'                         |
| tqaBKO_P3     | 5'-GCCCGTCACCGAGATTTAGGCATTATACAGGTGAACATAT-3'     |
| tqaBKO_P4     | 5'-CAATATCATCTTCTGTGCGACGAAACCTGCGAACTACCGGA-3'    |
| tqaBKO_P5     | 5'-GTAAGTCTTGGTTGGGGCCT-3'                         |
| tqaBKO_P6     | 5'-GTTCGACCGATTCGAGCAGC-3'                         |
| tqaCKO-P1     | 5'-GAAATCACTCGACAAGGTGGAC -3'                      |
| tqaCKO-P2     | 5'-AGGATGACGCCTCAGGAAATGT-3'                       |
| tqaCKO-P3     | 5'-TGCCCGTCACCGAGATTTAGGCTTCAAGCTCGGGTGTGGAAGG-3'  |
| tqaCKO-P4     | 5'-TCAATATCATCTTCTGTGCGACGAGACCTGCGGATCATTGGGAG-3' |
| tqaCKO-P5     | 5'-AGCGTAAACGTAACCTCCCACC-3'                       |
| tqaCKO-P6     | 5'-CTGAAGAAATGAGCCCATAGCA-3'                       |
| tqaDKO-P1     | 5'-TTCCCGGAGACTAGAAGTGGCT-3'                       |
| tqaDKO-P2     | 5'-TGCCACGGTAGCAATAGTCAAC-3'                       |
| tqaDKO-P3     | 5'-TGCCCGTCACCGAGATTTAGGGTCCCACAGTATGATCCAAGCAG-3' |
| tqaDKO-P4     | 5'-TCAATATCATCTTCTGTGCGACCTACAGTCGGATGCTATGGGCT-3' |
| tqaDKO-P5     | 5'-GATGCTCAAATGTGCGCCAGGTC-3'                      |
| tqaDKO-P6     | 5'-CTGAGGGAGTCAACATGGCAAG-3'                       |
| tqaEKO-P1     | 5'-TCGAACGATGGCTGCAAATCTT-3'                       |
| tqaEKO-P2     | 5'-GCCGATGGAGAGGAGGAAATAC-3'                       |
| tqaEKO-P3     | 5'-TGCCCGTCACCGAGATTTAGGTGGGTTGTTCCACGCAGAAGAC-3'  |
| tqaEKO-P4     | 5'-TCAATATCATCTTCTGTGCGACCAAGGCCGACAATGATGACAGT-3' |
| tqaEKO-P5     | 5'-AGGGCTTCCCATTTGATTTGGT-3'                       |
| tqaEKO-P6     | 5'-GTGGTGTCCAATGTGGACCAA-3'                        |
| tqaFKO-P1     | 5'-ATCGCCTTCCGAAGATAAGAGA-3'                       |
| tqaFKO-P2     | 5'-ATTTCTTCTGTAAACCTTCGTC-3'                       |
| tqaFKO-P3     | 5'-TGCCCGTCACCGAGATTTAGGAGGCGGTATGCGGATAACTGAG-3'  |
| tqaFKO-P4     | 5'-TCAATATCATCTTCTGTGCGACTGGCGATTTGACACACTTG-3'    |
| tqaFKO-P5     | 5'-TGAAGACAGTTCGCTACCGAGC-3'                       |
| tqaFKO-P6     | 5'-CAATTCCCAGCACTACTGAAG-3'                        |
| tqaGKO-P1     | 5'-ACAATACGGTCTTCCAGGCGCT-3'                       |
| tqaGKO-P2     | 5'-AGCTTGATTATCGCAGCAACCA-3'                       |
| tqaGKO-P3     | 5'-TGCCCGTCACCGAGATTTAGGAGGTGATGTGCGTTCCAAAGGA-3'  |
| tqaGKO-P4     | 5'-TCAATATCATCTTCTGTGCGACCAATGAGCACGGACACGAAAC-3'  |
| tqaGKO-P5     | 5'-GTTTGTGACCAAGGAGGAGGTG-3'                       |
| tqaGKO-P6     | 5'-GACTGTGGATGATGGAGAGCGT-3'                       |
| tqaHKO-P1     | 5'-ACCGTAGGCGTTCCACGTCATG-3'                       |
| tqaHKO-P2     | 5'-TGCTGGCTTTCATCAGATTGGT-3'                       |
| tqaHKO-P3     | 5'-TGCCCGTCACCGAGATTTAGGTCCGGTTCCTAATCCTGACTG-3'   |
| tqaHKO-P4     | 5'-TCAATATCATCTTCTGTGCGACATCTACGTGCGTGGAGTCACAG-3' |
| tqaHKO-P5     | 5'-TCTCAAATCGAGGGCAAGCAT-3'                        |
| tqaHKO-P6     | 5'-GATGGTGGGAGCTGATGGTTGG-3'                       |
| tqaIKO-P1     | 5'-TGCAATGAAGGCATCTGCACTG-3'                       |
| tqaIKO-P2     | 5'-GCCGACATCTTTGACCATCCTG-3'                       |
| tqaIKO-P3     | 5'-TGCCCGTCACCGAGATTTAGGTGGCCAGTATCCAAACATGGGT-3'  |

---

|                     |                                                     |
|---------------------|-----------------------------------------------------|
| tqaIKO-P4           | 5'-TCAATATCATCTTCTGTCGACAAATGGGCATTGGGAAGAACCT-3'   |
| tqaIKO-P5           | 5'-TGGCAAGCGACAACAAATCATC-3'                        |
| tqaIKO-P6           | 5'-GCAGTGTACGACCGAGTGGTG-3'                         |
| tqaKKO-P1           | 5'-GCAGCAAATTGCGAAAGCTCTC-3'                        |
| tqaKKO-P2           | 5'-ACCGTCGATGAGGCATCCTTTC-3'                        |
| tqaKKO-P3           | 5'-TGCCCGTCACCGAGATTTAGGGTTTCCTTCCATCCGGCTCTT-3'    |
| tqaKKO-P4           | 5'-TCAATATCATCTTCTGTCGACGACATAGCACTTGCAGCCATTG-3'   |
| tqaKKO-P5           | 5'-TGGCCGACTCGCTTACCGACTA-3'                        |
| tqaKKO-P6           | 5'-AGGTTGAGTTGGGTGGCCGACT-3'                        |
| tqaLKO-P1           | 5'-CAGGATTTCCGAATGAACCATG-3'                        |
| tqaLKO-P2           | 5'-GCTGTCTGTAAGGGAAAGCAGA-3'                        |
| tqaLKO-P3           | 5'-TGCCCGTCACCGAGATTTAGGTCCACGGCCAAGTCTCTGGTCT-3'   |
| tqaLKO-P4           | 5'-TCAATATCATCTTCTGTCGACGAACCTGTCGGATGGATATGGA-3'   |
| tqaLKO-P5           | 5'-CAGTCTAGTTGGTGATTTTCGTG-3'                       |
| tqaLKO-P6           | 5'-TCGTGGAGCCGGTCATAACTTT-3'                        |
| tqaMKO-P1           | 5'-TCTTGTTTCAGCGCATCCACTAC-3'                       |
| tqaMKO-P2           | 5'-GACTGACACAATCATGGCAATG-3'                        |
| tqaMKO-P3           | 5'-TGCCCGTCACCGAGATTTAGGTCAGGCTCTAATTTGGAAGATG-3'   |
| tqaMKO-P4           | 5'-TCAATATCATCTTCTGTCGACTTGGCTGTATGTAGAGGCCGCAG-3'  |
| tqaMKO-P5           | 5'-CTAGTGCGAATTAGTTCCCCA-3'                         |
| tqaMKO-P6           | 5'-GTCATCAATGAGTGGTTGTCGT-3'                        |
| orf4KO-P1           | 5'-TAGCGATGACAAGCATTGCG                             |
| orf4KO-P2           | 5'-GATCAAGCCAGTCGAGGTTG                             |
| orf4KO-P3           | 5'-TGCCCGTCACCGAGATTTAGGCACGTCTGGGTTGGACTATACTG-3'  |
| orf4KO-P4           | 5'-TCAATATCATCTTCTGTCGACAGTCGGTGAATGTGCTTCCA-3'     |
| orf4KO-P5           | 5'-TCCAGCAACACAAGTGAAGCT-3'                         |
| orf4KO-P6           | 5'-GAAATGGCAGAATCCCAGTCTT-3'                        |
| orf5KO-P1           | 5'-CTCTAAAGCGCGGCGAGTCG-3'                          |
| orf5KO-P2           | 5'-GATGGAGACATGGTGGTAATTG-3'                        |
| orf5KO-P3           | 5'-TGCCCGTCACCGAGATTTAGGAGTGAGGGCTCATGTCGTGGAG-3'   |
| orf5KO-P4           | 5'-TCAATATCATCTTCTGTCGACGTTGCATTGGGTCCTACAGTTC-3'   |
| orf5KO-P5           | 5'-CAAAGCCTCCGGCTTCTAGC-3'                          |
| orf5KO-P6           | 5'-TGCTATGTCTCGGGTATTTCG-3'                         |
| orf6KO-P1           | 5'-CATGTTTGTGGAGCAAGCCT-3'                          |
| orf6KO-P2           | 5'-TCGTGGGTACAATCTTCCGA-3'                          |
| orf6KO-P3           | 5'-TGCCCGTCACCGAGATTTAGGGGCAACCTGTCCGGGATTTTC-3'    |
| orf6KO-P4           | 5'-CAATATCATCTTCTGTCGACGTGTTCTCGGAGGACGAACA-3'      |
| orf6KO-P5           | 5'-CTCTGTTGGCAGGCTACCTC-3'                          |
| orf6KO-P6           | 5'-ACTAGCCGGGCTATAACAAGGT-3'                        |
| TqaB_SacI_F         | 5'- <u>AAGAGCTC</u> ATGTTTGAGCCAATCGAGACTC-3'       |
| TqaB_SacI_R         | 5'-TT <u>AAGCTT</u> TTACCCGTTGATCTTGGAGAGC-3'       |
| TqaB_CDFduet_SacI_F | 5'-AAAAAA <u>AGAGCTC</u> GATGTTTGAGCCAATCGAGACTC-3' |
| TqaH_NdeI_F         | 5'-AAAAAA <u>CATATG</u> ACAACCGACCGTCAACCAT-3'      |
| TqaH_EcoRI_R        | 5'-TTTTTT <u>GAATTC</u> TACCCGCGCTTGTATGTATTC-3'    |
| TqaH_XhoI_R         | 5'-TTTTTT <u>CTCGAG</u> TACCCGCGCTTGTATGTATTC-3'    |
| TqaD_NheI_F         | 5'- <u>AAGCTAGTA</u> TGACAGTCTCTGAAACAAAGA-3'       |
| TqaD_XhoI_R         | 5'- <u>AAGCTAGTA</u> ATTACGAAATGTATCTTGCAACT-3'     |
| Seq contig 1022B_R  | 5'-CTAACGTTTGAAGATATAAC-3'                          |
| Seq contig 326B_R   | 5'-GTCTTATGAGTATTCAGCCT-3'                          |

---

**Table S3** NMR Data of **1** and **20** in DMSO-d<sub>6</sub> Measured on 500 MHz Bruker NMR Spectrometer.

| <b>1</b>                             |                           |                                                     |                                       |                                  | <b>20</b>                 |                                                     |                                          |                                  |  |
|--------------------------------------|---------------------------|-----------------------------------------------------|---------------------------------------|----------------------------------|---------------------------|-----------------------------------------------------|------------------------------------------|----------------------------------|--|
|                                      |                           |                                                     |                                       |                                  |                           |                                                     |                                          |                                  |  |
| NO.                                  | <sup>13</sup> C<br>δ(ppm) | <sup>1</sup> H δ(ppm)<br>(m, J <sub>HH'</sub> (Hz)) | HMBC                                  | HMQC                             | <sup>13</sup> C<br>δ(ppm) | <sup>1</sup> H δ(ppm)<br>(m, J <sub>HH'</sub> (Hz)) | HMBC                                     | HMQC                             |  |
| <b>2</b>                             | 83.9                      | 5.22 (s)                                            | 16N-OH, H13                           | H2                               | 88.4                      | 5.41 (s)                                            | H15, H13,<br>16N-OH                      | H2                               |  |
| <b>3</b>                             | 85.5                      |                                                     | H2, H13                               |                                  | 84.2                      |                                                     | H13, H5, H2                              |                                  |  |
| <b>4</b>                             | 134.3                     |                                                     | H8, H6, H13                           |                                  | 134.3                     |                                                     | H8, H6, H13                              |                                  |  |
| <b>5</b>                             | 125.4                     | 7.91(m)                                             | H7                                    | H5                               | 125.4                     | 7.91(m)                                             |                                          | H5                               |  |
| <b>6</b>                             | 125.2                     | 7.30 (t, 7.4)                                       | H8                                    | H6                               | 125.4                     | 7.32 (t, 7.5)                                       | H8                                       | H6                               |  |
| <b>7</b>                             | 131.4                     | 7.52 (m)                                            | H5                                    | H7                               | 131.4                     | 7.53 (t, 7.5)                                       | H5, H9                                   | H7                               |  |
| <b>8</b>                             | 114.7                     | 7.52 (m)                                            | H6                                    | H8                               | 115.0                     | 7.50 (t, 7.5)                                       | H6                                       | H8                               |  |
| <b>9</b>                             | 137.1                     |                                                     | H5, H7                                |                                  | 137.2                     |                                                     | H5                                       |                                  |  |
| <b>11</b>                            | 169.9                     |                                                     | H12, H13                              |                                  | 169.8                     |                                                     | H12, H13                                 |                                  |  |
| <b>12</b>                            | 54.4                      | 5.91 (t, 9.9)                                       | H13                                   | H12                              | 54.5                      | 5.91 (t, 9.9)                                       | H13                                      | H12                              |  |
| <b>13</b>                            | 34.2                      | 3.12 (m)<br>3.08 (m)                                | H12, H2                               | H13<br>H13                       | 33.4                      | 3.13 (dd, 13.5, 9.9)<br>3.04 (dd, 13.5, 9.9)        | H2<br>H2                                 | H13<br>H13                       |  |
| <b>14</b>                            | 170.8                     |                                                     | H29, H30                              |                                  | 169.9                     |                                                     | H29, H2, H15                             | H15                              |  |
| <b>15</b>                            | 70.6                      |                                                     | H29, H30                              |                                  | 67.3                      | 4.07 (q, 7.1)<br>8.01 (s)                           | 16N-OH                                   |                                  |  |
| <b>16N-OH</b>                        |                           | 7.95 (S)                                            |                                       |                                  |                           |                                                     |                                          |                                  |  |
| <b>18</b>                            | 160.4                     |                                                     | H20, H12                              |                                  | 160.5                     |                                                     | H12, H20                                 |                                  |  |
| <b>19</b>                            | 119.8                     |                                                     | H23, H21                              |                                  | 119.8                     |                                                     | H23, H21                                 |                                  |  |
| <b>20</b>                            | 126.2                     | 8.17 (d, 7.9)                                       | H22                                   | H20                              | 126.2                     | 8.17 (d, 7.9)                                       | H18, H22                                 | H20                              |  |
| <b>21</b>                            | 128.3                     | 7.63 (t, 7.5)                                       | H23                                   | H21                              | 128.1                     | 7.63 (t, 7.6)                                       | H23                                      | H21                              |  |
| <b>22</b>                            | 135.6                     | 7.94 (m)                                            | H20                                   | H22                              | 135.6                     | 7.92 (m)                                            | H20                                      | H22                              |  |
| <b>23</b>                            | 127.4                     | 7.76 (d, 8.2)                                       | H21                                   | H23                              | 127.4                     | 7.76 (d, 8.1)                                       | H21                                      | H23                              |  |
| <b>24</b>                            | 146.0                     |                                                     | H20, H22                              |                                  | 146.0                     |                                                     | H20, H22                                 |                                  |  |
| <b>26</b>                            | 154.8                     |                                                     | H27, H12, H28                         |                                  | 154.9                     |                                                     | H27, H28                                 |                                  |  |
| <b>27</b>                            | 68.4                      | 6.31 (q, 6.2)                                       | H28                                   | H27                              | 68.4                      | 6.28 (q, 6.3)                                       | H28                                      | H27                              |  |
| <b>CH<sub>3</sub>COO<sup>-</sup></b> | 170.1                     |                                                     | H27, CH <sub>3</sub> COO <sup>-</sup> |                                  | 170.1                     |                                                     | H27,<br>CH <sub>3</sub> COO <sup>-</sup> |                                  |  |
| <b>CH<sub>3</sub>COO<sup>-</sup></b> | 20.6                      | 2.07 (s)                                            |                                       | CH <sub>3</sub> COO <sup>-</sup> | 20.6                      | 2.08 (s)                                            |                                          | CH <sub>3</sub> COO <sup>-</sup> |  |
| <b>28</b>                            | 18.6                      | 1.68 (d, 6.3)                                       | H27                                   | H28                              | 18.6                      | 1.68 (d, 6.3)                                       | H27                                      | H28                              |  |
| <b>29</b>                            | 22.8                      | 1.30 (s)                                            | H30                                   | H29                              | 10.9                      | 1.43 (d, 7.1)                                       | H15                                      | H29                              |  |
| <b>30</b>                            | 16.7                      | 1.34 (s)                                            | H29                                   | H30                              |                           |                                                     |                                          |                                  |  |



**Table S4** NMR Data of **14** in CDCl<sub>3</sub> Measured on 500 MHz Bruker NMR Spectrometer.

| <b>14</b>                                                                         |                           |                                                    |                              |      |
|-----------------------------------------------------------------------------------|---------------------------|----------------------------------------------------|------------------------------|------|
| 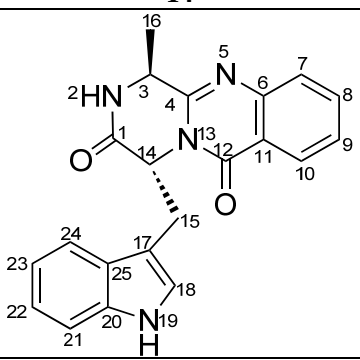 |                           |                                                    |                              |      |
| NO.                                                                               | <sup>13</sup> C<br>δ(ppm) | <sup>1</sup> H δ(ppm)<br>(m, J <sub>HH</sub> (Hz)) | HMBC                         | HMQC |
| <b>1</b>                                                                          | 169.3                     |                                                    | H2, H14, H15                 |      |
| <b>2</b>                                                                          |                           | 6.63 (br)                                          |                              | H3   |
| <b>3</b>                                                                          | 49.1                      | 3.13 (q, 6.5, 0.3)                                 | NH2, H16                     |      |
| <b>4</b>                                                                          | 151.6                     |                                                    | H2, H14, H3, H16             |      |
| <b>6</b>                                                                          | 147.0                     |                                                    | H10, H8                      |      |
| <b>7</b>                                                                          | 127.3                     | 7.59 (d, 8.1)                                      | H9, H10                      | H7   |
| <b>8</b>                                                                          | 134.7                     | 7.77 (td, 7.7, 1.7)                                | H10                          | H8   |
| <b>9</b>                                                                          | 127.1                     | 7.53 (t, 7.6)                                      | H8, H7                       | H9   |
| <b>10</b>                                                                         | 126.8                     | 8.36 (dd, 8.0, 1.1)                                | H8, H9                       | H10  |
| <b>11</b>                                                                         | 120.2                     |                                                    | H7, H9                       |      |
| <b>12</b>                                                                         | 160.8                     |                                                    | H10                          |      |
| <b>14</b>                                                                         | 57.5                      | 5.68 (m)                                           | NH2, H15                     | H14  |
| <b>15</b>                                                                         | 27.0                      | 3.70 (dd, 14.8, 5.1)<br>3.64 (dd, 15.0, 3.6)       | H18, H14                     | H15  |
| <b>16</b>                                                                         | 19.1                      | 1.36 (d, 6.6)                                      | H3                           | H16  |
| <b>17</b>                                                                         | 109.4                     |                                                    | H19, H24, H23, H18, H14, H15 |      |
| <b>18</b>                                                                         | 123.5                     | 6.67 (d, 1.7)                                      | H15                          | H18  |
| <b>19</b>                                                                         |                           | 8.26 (br)                                          |                              |      |
| <b>20</b>                                                                         | 135.9                     |                                                    | H19, H24, H22, H18           |      |
| <b>21</b>                                                                         | 111.2                     | 7.28 (d, 8.1)                                      | H22                          | H21  |
| <b>22</b>                                                                         | 122.6                     | 7.12 (t, 7.8)                                      | H24, H21, H23                | H22  |
| <b>23</b>                                                                         | 120.0                     | 6.91 (t, 7.6)                                      | H21, H22                     | H23  |
| <b>24</b>                                                                         | 118.5                     | 7.39 (d, 8.0)                                      | H21, H22                     | H24  |
| <b>25</b>                                                                         | 127.3                     |                                                    | H24, H21, H23, H18, H15      |      |

**Table S5** NMR Data of **18** and **19** in DMSO-*d*<sub>6</sub> Measured on 500 MHz Bruker NMR Spectrometer.

| <b>18</b>   |                           |                                                    |                |            | <b>19</b>                 |                                                    |                |      |  |
|-------------|---------------------------|----------------------------------------------------|----------------|------------|---------------------------|----------------------------------------------------|----------------|------|--|
|             |                           |                                                    |                |            |                           |                                                    |                |      |  |
| NO.         | <sup>13</sup> C<br>δ(ppm) | <sup>1</sup> H δ(ppm)<br>(m, J <sub>HH</sub> (Hz)) | HMBC           | HMQC       | <sup>13</sup> C<br>δ(ppm) | <sup>1</sup> H δ(ppm)<br>(m, J <sub>HH</sub> (Hz)) | HMBC           | HMQC |  |
| <b>2</b>    | 79.0                      | 5.00 (d, 9.0)                                      | H3, 16NH       | H2         | 81.8                      | 5.11 (d, 8.7)                                      |                | H2   |  |
| <b>3</b>    | 74.4                      |                                                    |                |            | 75.0                      |                                                    | H2, 3OH        |      |  |
| <b>3OH</b>  |                           | 5.66(s)                                            |                |            |                           | 5.60 (s)                                           |                |      |  |
| <b>4</b>    | 138.1                     |                                                    | H8             |            | 138.1                     |                                                    | H8             |      |  |
| <b>5</b>    | 124.5                     | 7.45 (d, 7.6)                                      | H7             | H5         | 124.6                     | 7.45(d, 7.7)                                       | H7             | H5   |  |
| <b>6</b>    | 124.8                     | 7.12(m)                                            | H8             | H6         | 124.8                     | 7.13 (dd, 9.9, 6.3)                                | H8             | H6   |  |
| <b>7</b>    | 129.7                     | 7.33(m)                                            | H5             | H7         | 129.6                     | 7.33 (m)                                           | H5             | H7   |  |
| <b>8</b>    | 114.4                     | 7.32(m)                                            | H6             | H8         | 114.6                     | 7.33 (m)                                           | H6             | H8   |  |
| <b>9</b>    | 137.4                     |                                                    | H5, H7         |            | 137.5                     |                                                    | H5             |      |  |
| <b>11</b>   | 175.3                     |                                                    | H13            |            | 174.7                     |                                                    | H13            |      |  |
| <b>12</b>   | 53.0                      | 5.35(dd, 8.0, 3.6)                                 | H13, 31NH      | H12        | 53.0                      | 5.38 (dd, 13.0, 9.9)                               | 31NH           | H12  |  |
| <b>13</b>   | 37.5                      | 2.81 (dd, 14.4, 7.9)<br>2.69 (dd, 14.4, 7.5)       | 16NH           | H13<br>H13 | 37.5                      | 2.83 (dd, 14.8, 3.9)<br>2.66 (dd, 14.7, 7.4)       | 3OH            | H13  |  |
| <b>14</b>   | 168.5                     |                                                    | H29, H30       |            | 168.5                     |                                                    | H13, H29       |      |  |
| <b>15</b>   | 64.4                      |                                                    | H29, H30       |            | 60.0                      | 3.65 (m)<br>3.17 (m)                               |                | H15  |  |
| <b>16NH</b> |                           | 2.84 (d, 3.4)                                      |                |            |                           |                                                    |                |      |  |
| <b>18</b>   | 160.3                     |                                                    | H20            |            | 160.3                     |                                                    | H20            |      |  |
| <b>19</b>   | 120.2                     |                                                    | H21, H23       |            | 120.1                     |                                                    | H21, H23       |      |  |
| <b>20</b>   | 126.2                     | 8.15 (d, 7.9)                                      | H22            | H20        | 126.3                     | 8.15 (d, 7.9)                                      | H22            | H20  |  |
| <b>21</b>   | 126.7                     | 7.53 (t, 7.5)                                      | H23            | H21        | 126.8                     | 7.54 (t, 7.6)                                      | H23            | H21  |  |
| <b>22</b>   | 134.5                     | 7.83 (m)                                           | H20            | H22        | 134.5                     | 7.84 (t, 7.7)                                      | H20            | H22  |  |
| <b>23</b>   | 126.9                     | 7.66 (d, 8.0)                                      | H21            | H23        | 127.0                     | 7.67 (d, 8.1)                                      | H21            | H23  |  |
| <b>24</b>   | 147.0                     |                                                    | H20, H22       |            | 146.9                     |                                                    | H20, H22, H27  |      |  |
| <b>26</b>   | 152.9                     |                                                    | H27, 31NH, H28 |            | 153.0                     |                                                    | H27, 31NH, H28 |      |  |
| <b>27</b>   | 48.8                      | 4.96 (q, 6.3)                                      | H28, 31NH      | H27        | 48.7                      | 4.96 (q, 6.1)                                      | 31NH, H28      | H27  |  |
| <b>28</b>   | 17.3                      | 1.58 (d, 6.5)                                      | H27            | H28        | 17.1                      | 1.58 (d, 6.6)                                      | H27            | H28  |  |
| <b>29</b>   | 24.4                      | 1.11(s)                                            | H29            | H29        | 17.2                      | 0.98 (d, 7.1)                                      |                | H29  |  |
| <b>30</b>   | 23.5                      | 0.93(s)                                            | H30            | H30        |                           |                                                    |                |      |  |
| <b>31NH</b> |                           | 8.67(s)                                            |                |            |                           | 8.67 (s)                                           |                |      |  |

**Table S6** NMR Data of **24** and **25** in DMSO-*d*<sub>6</sub> Measured on 500 MHz Bruker NMR Spectrometer.

| <b>24</b>    |                           |                                                    |             |      | <b>25</b>                 |                                                    |           |      |  |
|--------------|---------------------------|----------------------------------------------------|-------------|------|---------------------------|----------------------------------------------------|-----------|------|--|
|              |                           |                                                    |             |      |                           |                                                    |           |      |  |
| NO.          | <sup>13</sup> C<br>δ(ppm) | <sup>1</sup> H δ(ppm)<br>(m, J <sub>HH</sub> (Hz)) | HMBC        | HMQC | <sup>13</sup> C<br>δ(ppm) | <sup>1</sup> H δ(ppm)<br>(m, J <sub>HH</sub> (Hz)) | HMBC      | HMQC |  |
| <b>2</b>     | 79.8                      | 5.22 (d, 6.8)                                      | 16NH, H13   | H2   | 84.3                      | 5.31 (s)                                           | 16NOH     | H2   |  |
| <b>3</b>     | 83.8                      |                                                    | H2, H13     |      | 83.5                      |                                                    | H2,H5,H13 |      |  |
| <b>4</b>     | 134.6                     |                                                    | H6, H8, H13 |      | 134.4                     |                                                    | H5,H8,H13 |      |  |
| <b>5</b>     | 124.6                     | 7.59(d, 7.3)                                       | H7          | H5   | 124.6                     | 7.58(d, 7.5)                                       | H7        | H5   |  |
| <b>6</b>     | 125.5                     | 7.33 (t, 7.4)                                      | H8          | H6   | 125.4                     | 7.31 (dd, 10.0, 3.8)                               | H8        | H6   |  |
| <b>7</b>     | 131.4                     | 7.52 (m)                                           | H5          | H7   | 131.5                     | 7.53 (m)                                           | H5        | H7   |  |
| <b>8</b>     | 115.3                     | 7.49 (m)                                           | H6          | H8   | 114.9                     | 7.50 (m)                                           | H6        | H8   |  |
| <b>9</b>     | 138.0                     |                                                    | H7, H8      |      | 137.3                     |                                                    | H5, H7,H8 |      |  |
| <b>11</b>    | 170.0                     |                                                    | H13         |      | 170.1                     |                                                    | H13       |      |  |
| <b>12</b>    | 55.8                      | 6.08 (t, 9.9)                                      | H2,H13      | H12  | 55.9                      | 6.16(t, 10.4)                                      | H13       | H12  |  |
| <b>13</b>    | 33.4                      | 3.17(dd, 13.1, 9.8)                                | H2          | H13  | 35.1                      | 3.21 (m)                                           | H2        |      |  |
|              |                           | 3.08(dd, 13.1, 9.9)                                |             | H13  |                           | 3.18 (dd, 12.6, 9.2)                               |           | H13  |  |
| <b>14</b>    | 175.0                     |                                                    | H29, H30    |      | 171.1                     |                                                    | H29, H30  |      |  |
| <b>15</b>    | 64.9                      |                                                    | H29, H30    |      | 70.6                      |                                                    | H29, H30  |      |  |
| <b>16NH</b>  |                           | 3.22 (d, 8.4)                                      |             |      |                           |                                                    |           |      |  |
| <b>16NOH</b> |                           |                                                    |             |      |                           | 8.29 (s)                                           |           |      |  |
| <b>18</b>    | 160.1                     |                                                    | H20         |      | 160.1                     |                                                    | H20       |      |  |
| <b>19</b>    | 121.4                     |                                                    | H21, H23    |      | 121.6                     |                                                    | H21, H23  |      |  |
| <b>20</b>    | 126.4                     | 8.22 (d, 8.0)                                      | H22         | H20  | 126.4                     | 8.18 (d, 7.9)                                      | H22       | H20  |  |
| <b>21</b>    | 129.6                     | 7.74 (t, 7.6)                                      | H23         | H21  | 129.7                     | 7.74 (t, 7.6)                                      | H23       | H21  |  |
| <b>22</b>    | 135.5                     | 7.98 (t, 7.7)                                      | H20         | H22  | 135.5                     | 7.98 (t, 7.7)                                      | H20       | H22  |  |
| <b>23</b>    | 128.3                     | 7.89 (d, 8.2)                                      | H21         | H23  | 128.4                     | 7.89 (d, 8.0)                                      | H21       | H23  |  |
| <b>24</b>    | 145.0                     |                                                    | H20, H22    |      | 145.0                     |                                                    | H20, H22  |      |  |
| <b>26</b>    | 150.0                     |                                                    |             |      | 150.0                     |                                                    | H28       |      |  |
| <b>27</b>    | 195.2                     |                                                    | H28         |      | 195.3                     |                                                    | H28       |      |  |
| <b>28</b>    | 27.4                      | 2.77 (s)                                           |             | H28  | 27.4                      | 2.77 (s)                                           |           | H28  |  |
| <b>29</b>    | 25.6                      | 1.34 (s)                                           | H30         | H29  | 22.8                      | 1.27 (s)                                           | H30       | H29  |  |
| <b>30</b>    | 24.9                      | 1.42 (s)                                           | NH, H29     | H30  | 16.3                      | 1.32 (s)                                           | H29       | H30  |  |

**Table S7** NMR Data of **28** in DMSO-*d*<sub>6</sub> Measured on 500 MHz Bruker NMR Spectrometer.

| <b>28</b>                            |                        |                                                    |                                       |                                  |
|--------------------------------------|------------------------|----------------------------------------------------|---------------------------------------|----------------------------------|
|                                      |                        |                                                    |                                       |                                  |
| No                                   | <sup>13</sup> C δ(ppm) | <sup>1</sup> H δ(ppm)<br>(m, J <sub>HH</sub> (Hz)) | HMBC                                  | HMQC                             |
| <b>2</b>                             | 80.6                   | 5.47 (d, 7.3)                                      | NH, H13                               | H2                               |
| <b>3</b>                             | 84.3                   |                                                    | H2, H5, NH, H13                       |                                  |
| <b>4</b>                             | 134.5                  |                                                    | H6, H13                               |                                  |
| <b>5</b>                             | 125.8                  | 7.92(m)                                            | H7                                    | H5                               |
| <b>6</b>                             | 125.2                  | 7.32 (t, 7.4)                                      | H8                                    | H6                               |
| <b>7</b>                             | 131.3                  | 7.52 (m)                                           | H5                                    | H7                               |
| <b>8</b>                             | 114.9                  | 7.49 (m)                                           | H6                                    | H8                               |
| <b>9</b>                             | 138.0                  |                                                    | H5, H8                                |                                  |
| <b>11</b>                            | 170.4                  |                                                    | H12, H13                              |                                  |
| <b>12</b>                            | 54.1                   | 5.91 (t, 9.6)                                      | H13                                   | H12                              |
| <b>13</b>                            | 33.4                   | 3.10 (dd, 13.8, 10.6)<br>2.90 (dd, 13.8, 8.9)      | H2, H12, H13                          | H13                              |
| <b>14</b>                            | 174.9                  |                                                    | NH, H28,H29                           |                                  |
| <b>15</b>                            | 64.6                   |                                                    | H29, H30                              |                                  |
| <b>16NH</b>                          |                        | 3.18 (d, 7.4)                                      |                                       |                                  |
| <b>18</b>                            | 160.4                  |                                                    | H20                                   |                                  |
| <b>19</b>                            | 119.8                  |                                                    | H23, H21                              |                                  |
| <b>20</b>                            | 126.3                  | 8.20 (d, 7.9)                                      | H22                                   | H20                              |
| <b>21</b>                            | 127.9                  | 7.62 (t, 7.6)                                      | H23                                   | H21                              |
| <b>22</b>                            | 135.5                  | 7.91 (m)                                           | H20                                   | H22                              |
| <b>23</b>                            | 127.4                  | 7.74 (d, 8.1)                                      | H21                                   | H23                              |
| <b>24</b>                            | 146.1                  |                                                    | H20                                   |                                  |
| <b>26</b>                            | 155.0                  |                                                    | H12, H22, H26, H27                    |                                  |
| <b>27</b>                            | 68.3                   | 6.19 (q, 6.3)                                      | H28                                   | H27                              |
| <b>CH<sub>3</sub>COO<sup>-</sup></b> | 170.2                  |                                                    | H27, CH <sub>3</sub> COO <sup>-</sup> |                                  |
| <b>CH<sub>3</sub>COO<sup>-</sup></b> | 20.6                   | 2.10 (s)                                           |                                       | CH <sub>3</sub> COO <sup>-</sup> |
| <b>28</b>                            | 18.7                   | 1.67 (d, 6.3)                                      | H27                                   | H28                              |
| <b>29</b>                            | 24.9                   | 1.44 (s)                                           | 16NH, H30                             | H29                              |
| <b>30</b>                            | 25.5                   | 1.22 (s)                                           | H29                                   | H30                              |

# PCR verification: PaeNRPS1275 Knockout

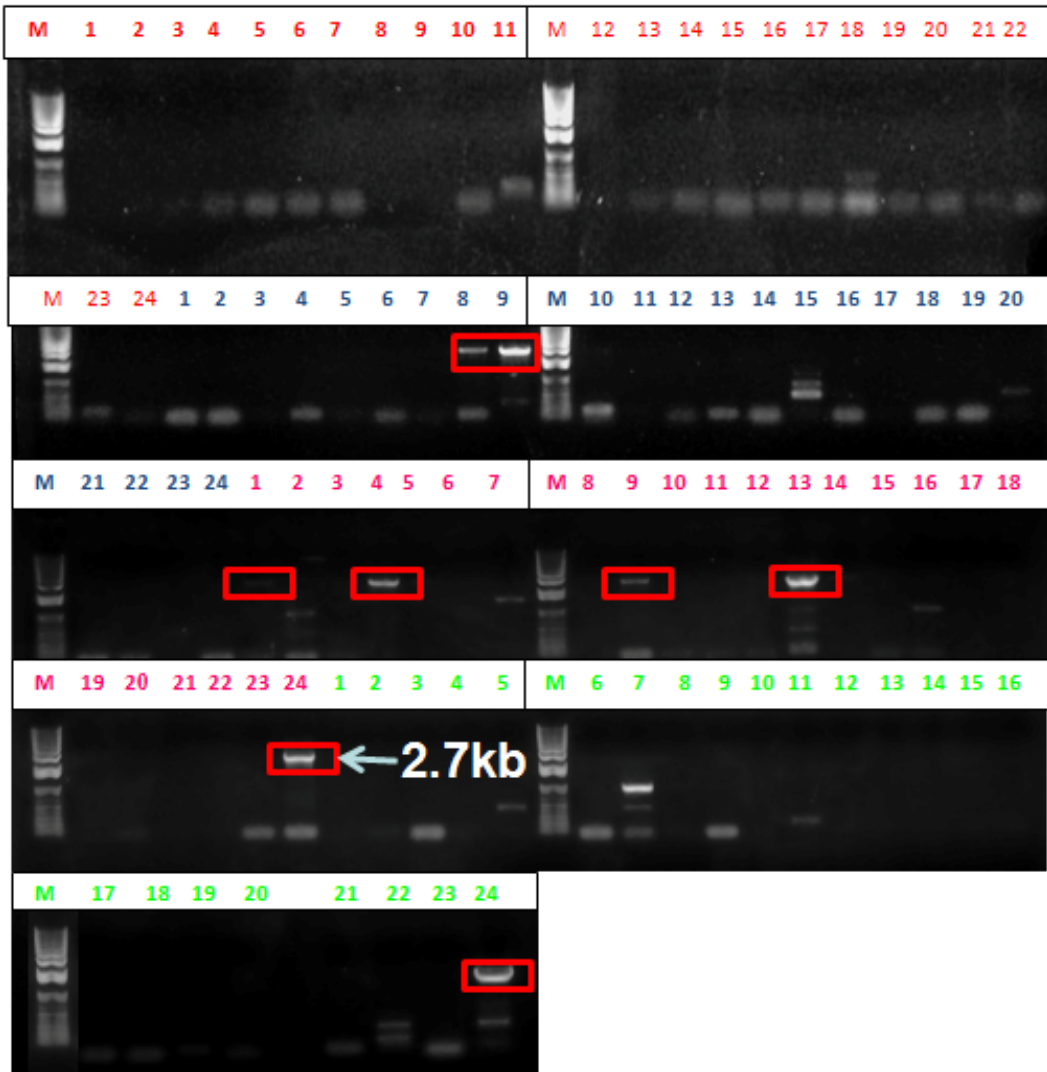

**Figure S1** PCR verification of PaeNRPS1275 transformants as an example. 96 transformants were screened by PCR using bar gene primer (BarF) and primer outside of the deletion cassette (PaeNRPS1275KO\_P1). Positive transformants showed a band at 2.7kb.

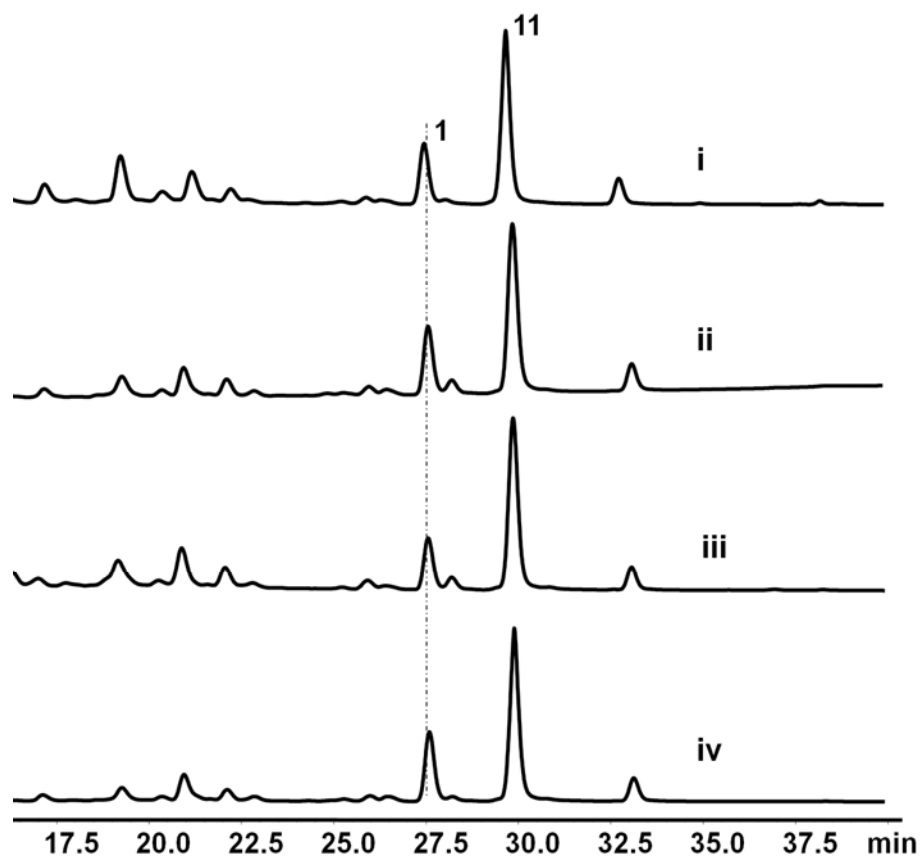

**Figure S2** HPLC traces of metabolic extracts from single gene deletion strains of *P. aethiopicum*. Trace i:  $\Delta gsfA$ ; trace ii  $\Delta gsfA/\Delta orf4$ ; trace iii:  $\Delta gsfA/\Delta orf5$ ; trace iv:  $\Delta gsfA/\Delta orf6$ .

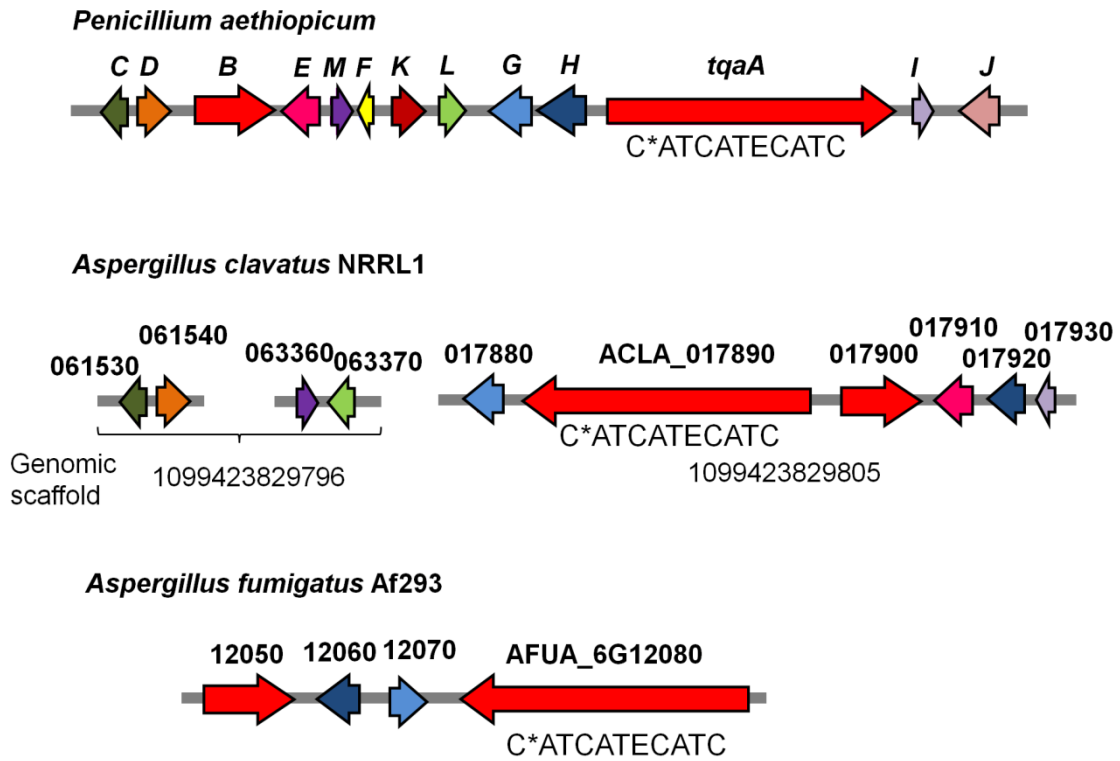

**Figure S3** Corresponding *tqa* homologs in *A. clavatus* NRRL1 and *A. fumigatus* Af293 (corresponding homologs are in the same color); domain architecture of TqA, TqvA (ACLA\_017890) and FqaA (AFUA\_6G12080). Homologous *tqv* gene cluster are fragmented in three different genomic loci.

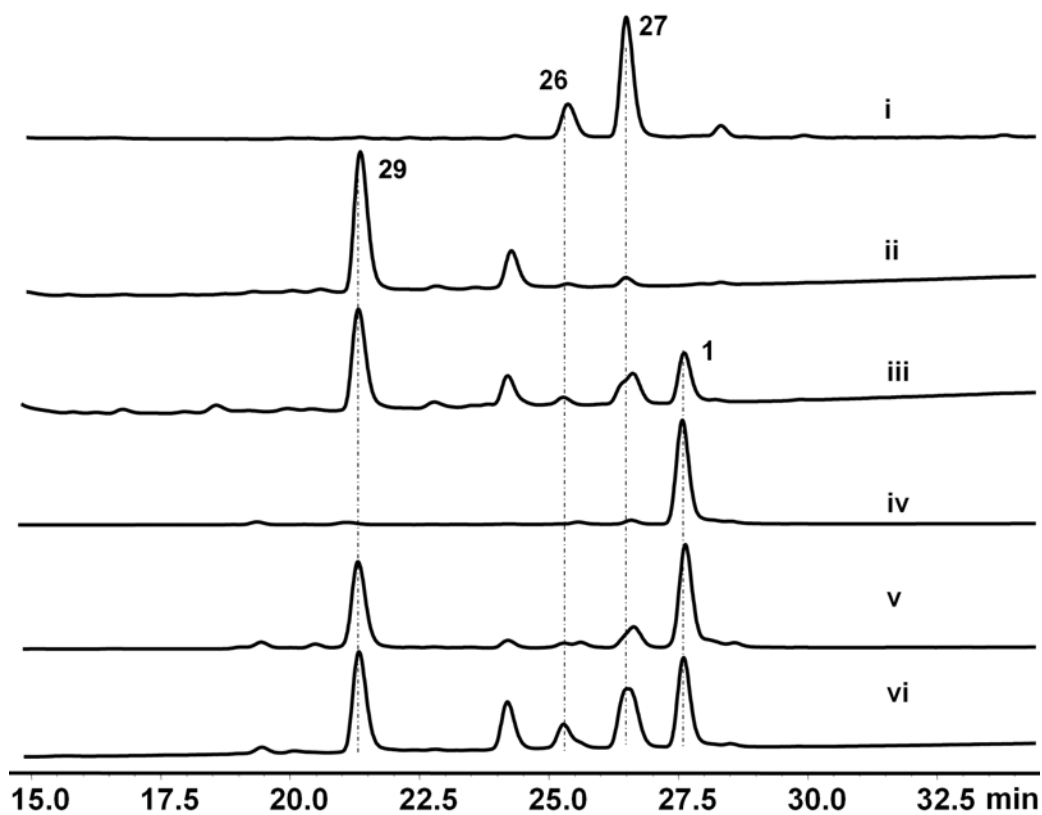

**Figure S4** Biochemical characterizations of TqaD. Trace i: Compound **26** and **27** purified from  $\Delta tqaD$  strain as substrate; extracts from overnight in vitro assays in 50 mM HEPES, pH 7.9, trace ii: control with 1 mM **26** and **27** mixture, 4 mM acetyl-CoA; trace iii: assay with 1 mM **26** and **27** mixture, 4 mM acetyl-CoA, 10  $\mu$ M TqaD; trace iv: control with 1 mM **1**; trace v: assay with 1 mM **1**, 10  $\mu$ M TqaD; trace vi: assay with 1 mM **1**, 10  $\mu$ M TqaD. Reaction samples in trace i to v were extracted by EA only; reaction sample in trace vi is extracted by EA+5% TFA.



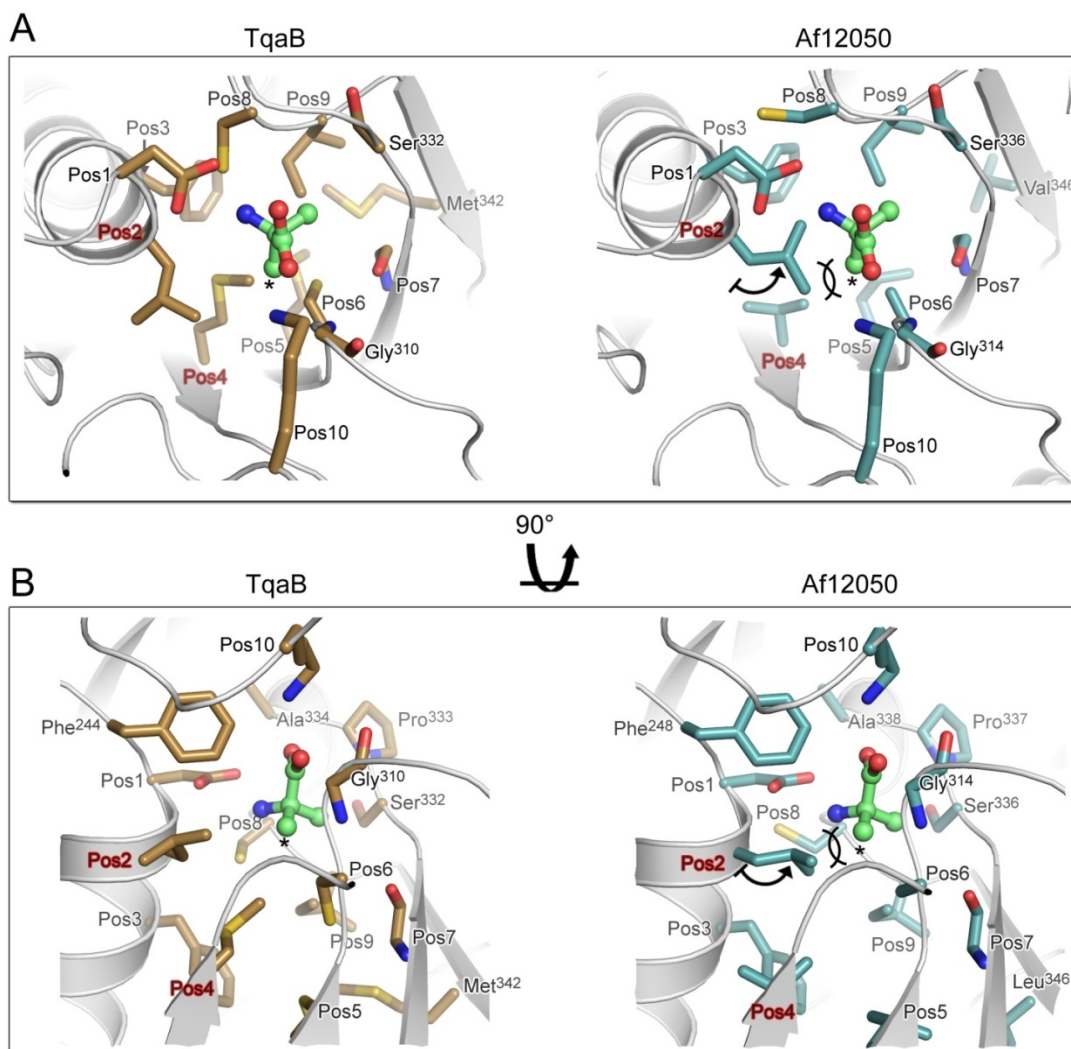

**Figure S5** Substrate binding pocket comparison of the A-domains of TqaB and Af12050 generated via homology modeling using HHpred with PDB<sub>id</sub> 1AMU as template. **(A)** A top-down view of the modeled substrate binding pocket and **(B)** a side-on view generated by rotating 90° about the horizontal plane. Residues are labeled according to their position in the 10AA specificity code or with their respective residue identifier. 2-aminoisobutyric acid (2-AIB, green ball-and-stick) was manually docked into the active site based on the position of the bound Phe of 1AMU. The *pro-R* (D-configuration) methyl of 2-AIB is indicated by an asterisk. The overlapping “⌋” symbol indicates steric clash.

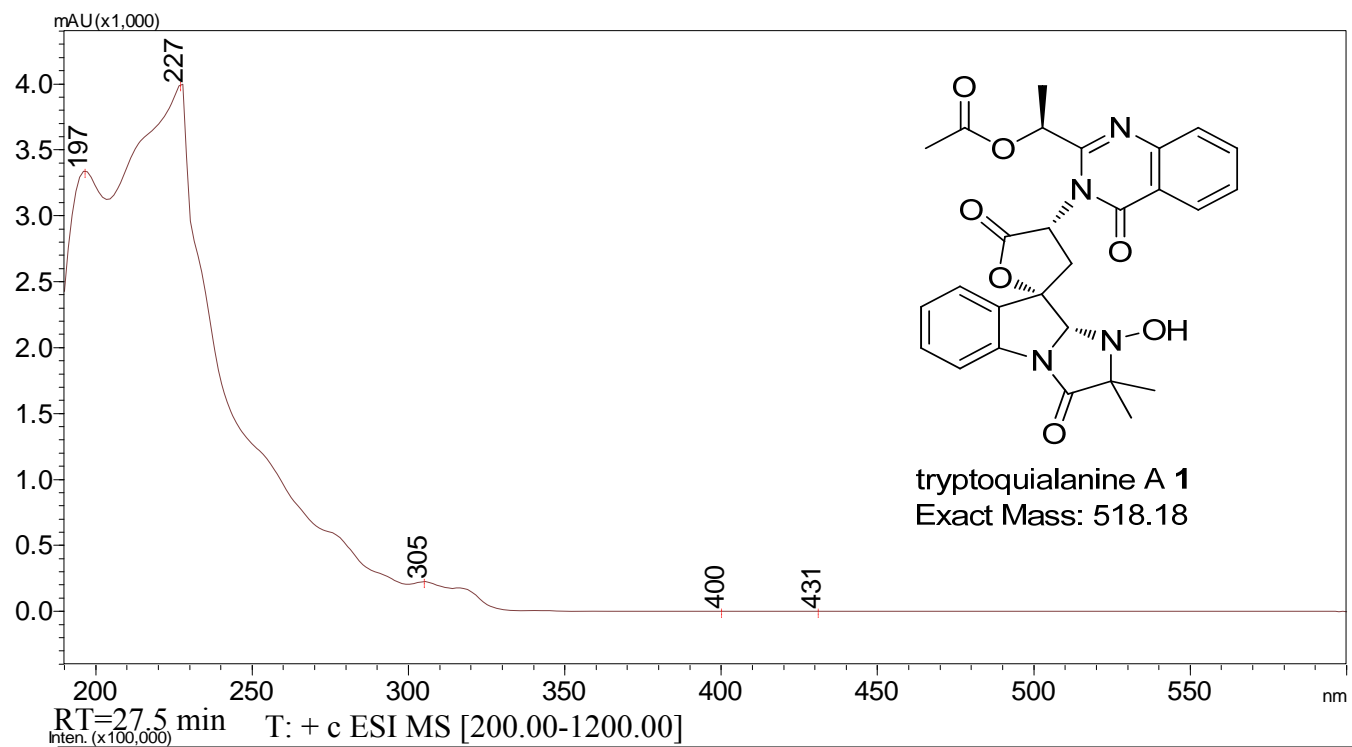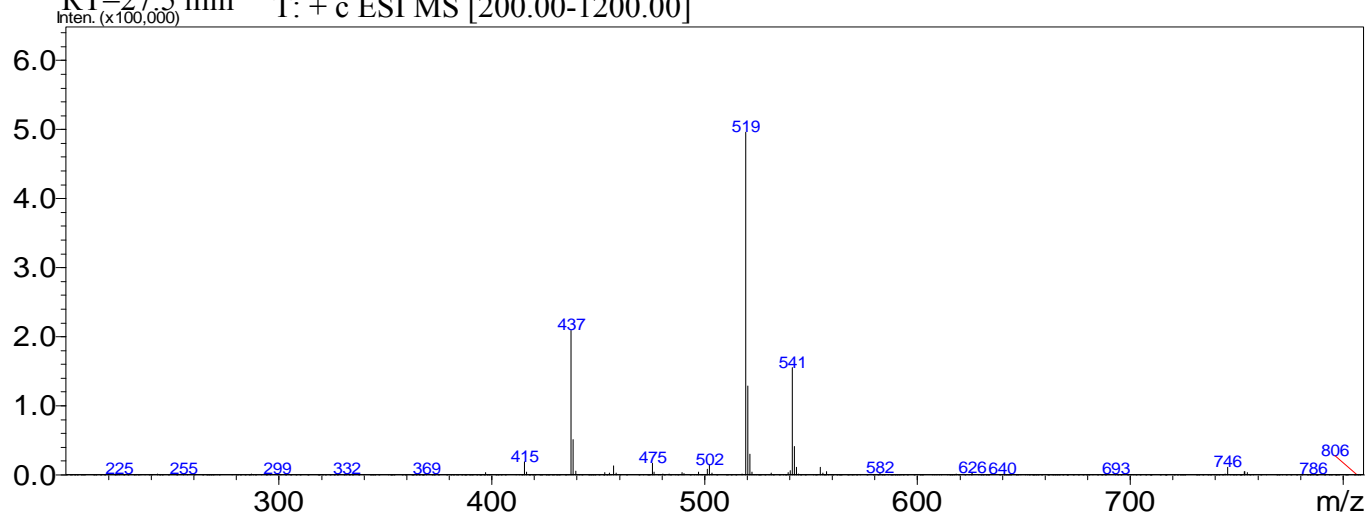

Figure S6.1 UV spectrum and MS Measured during LC-MS for **1**

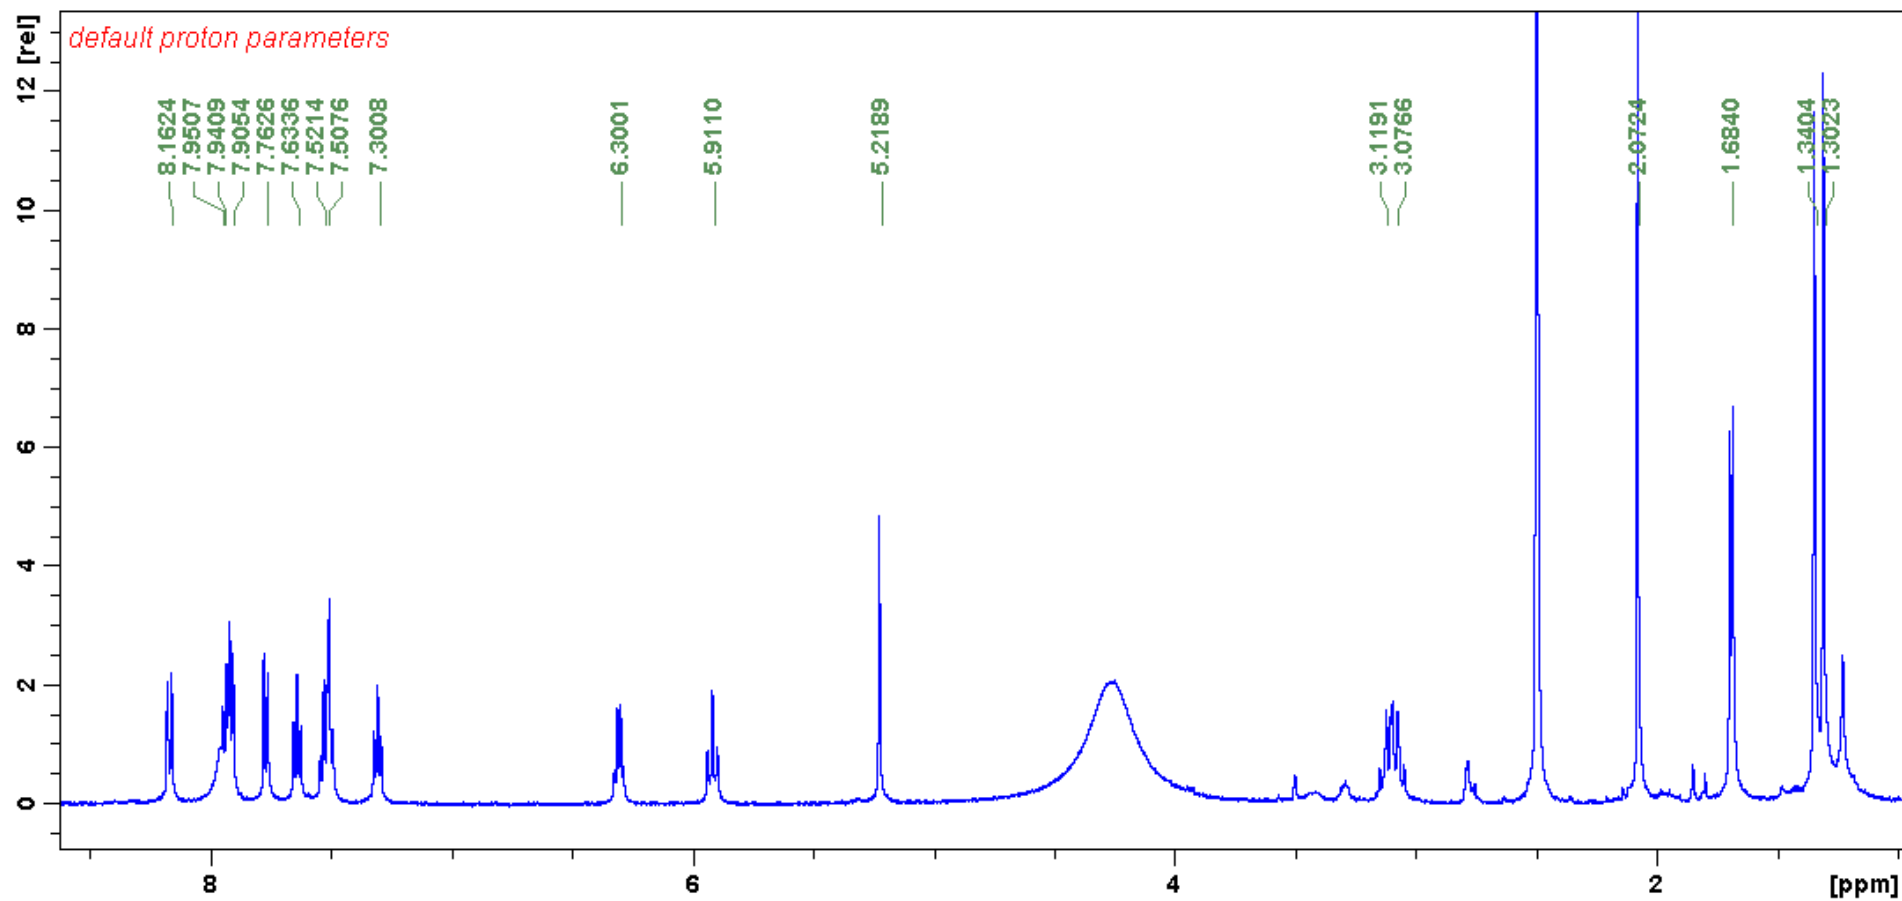

Figure S6.2  $^1\text{H}$  NMR spectrum of **1**. Measured in  $\text{DMSO-}d_6$  at 500MHz

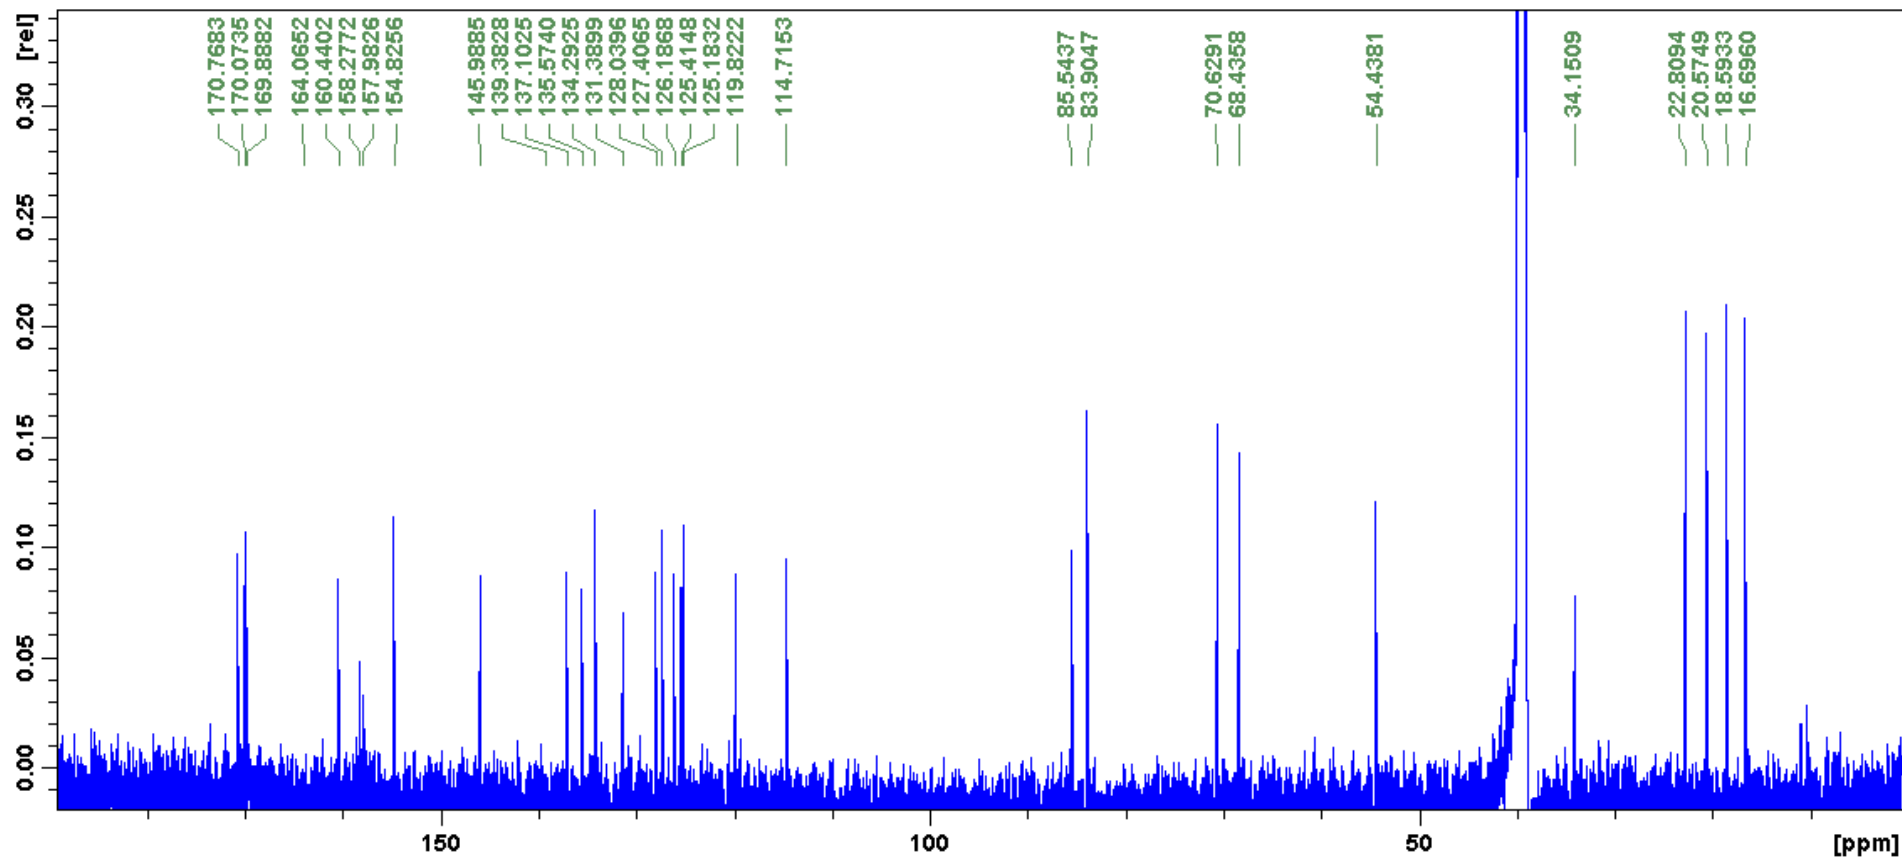

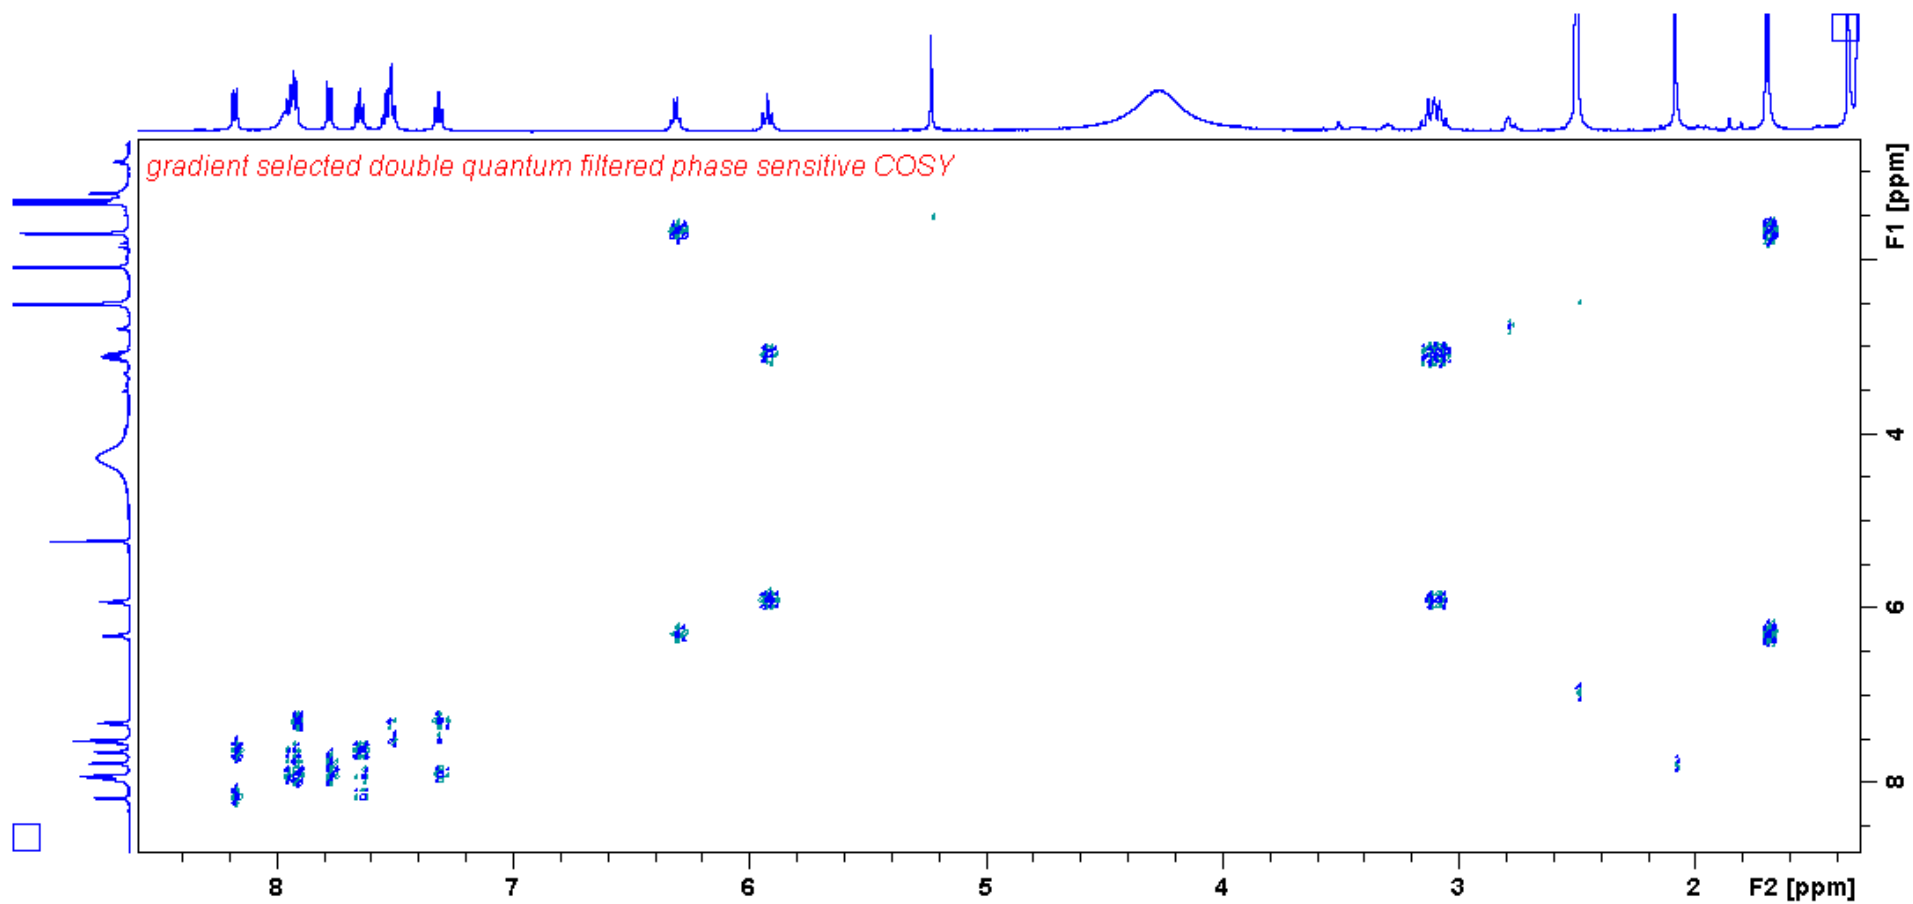

Figure S6.4  $^1\text{H}$ - $^1\text{H}$  COSY spectrum of **1**.

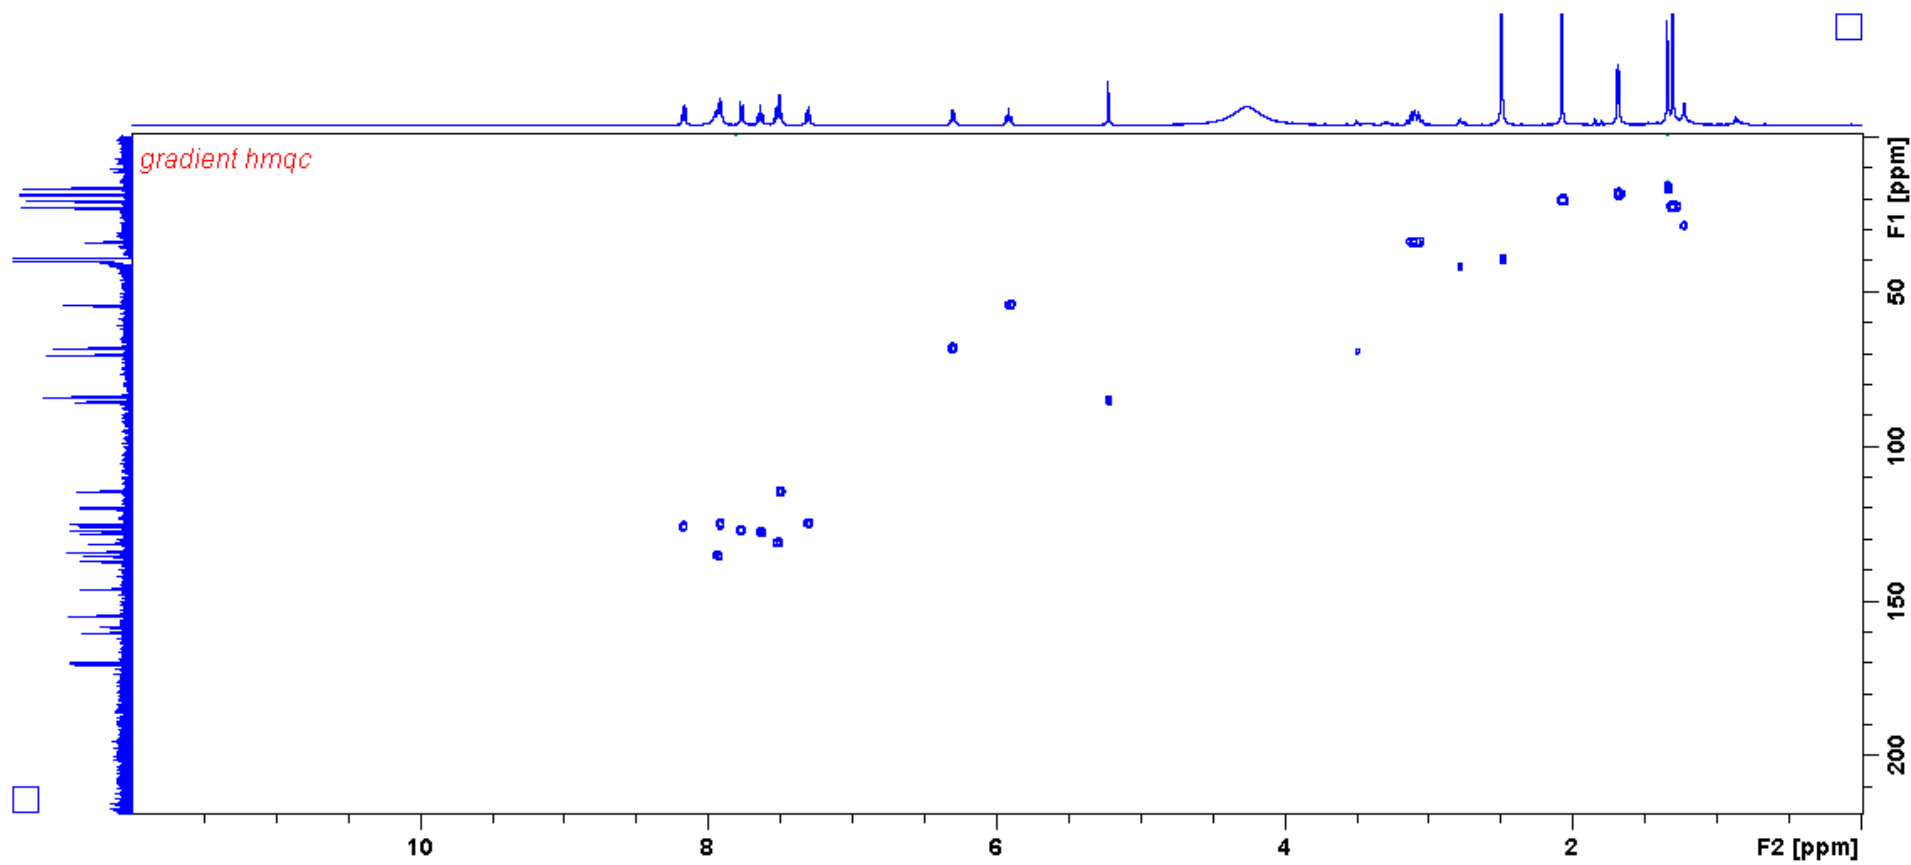

Figure S6.5 HMQC spectrum of **1**.

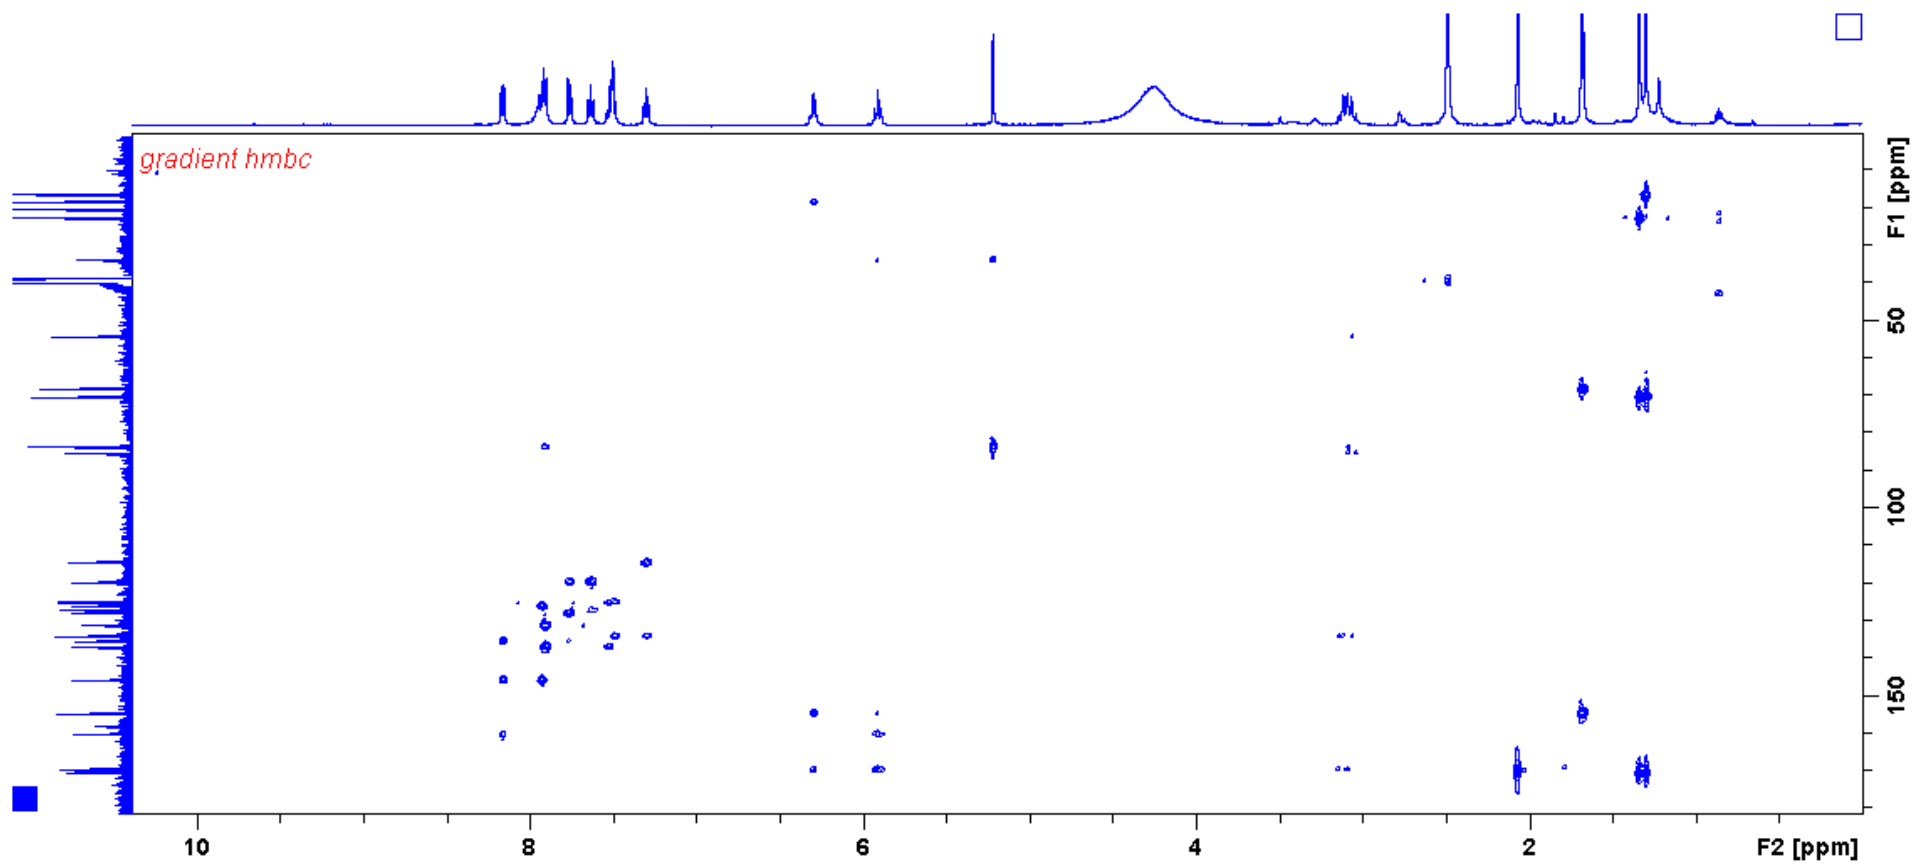

Figure S6.6 HMBC spectrum of **1**

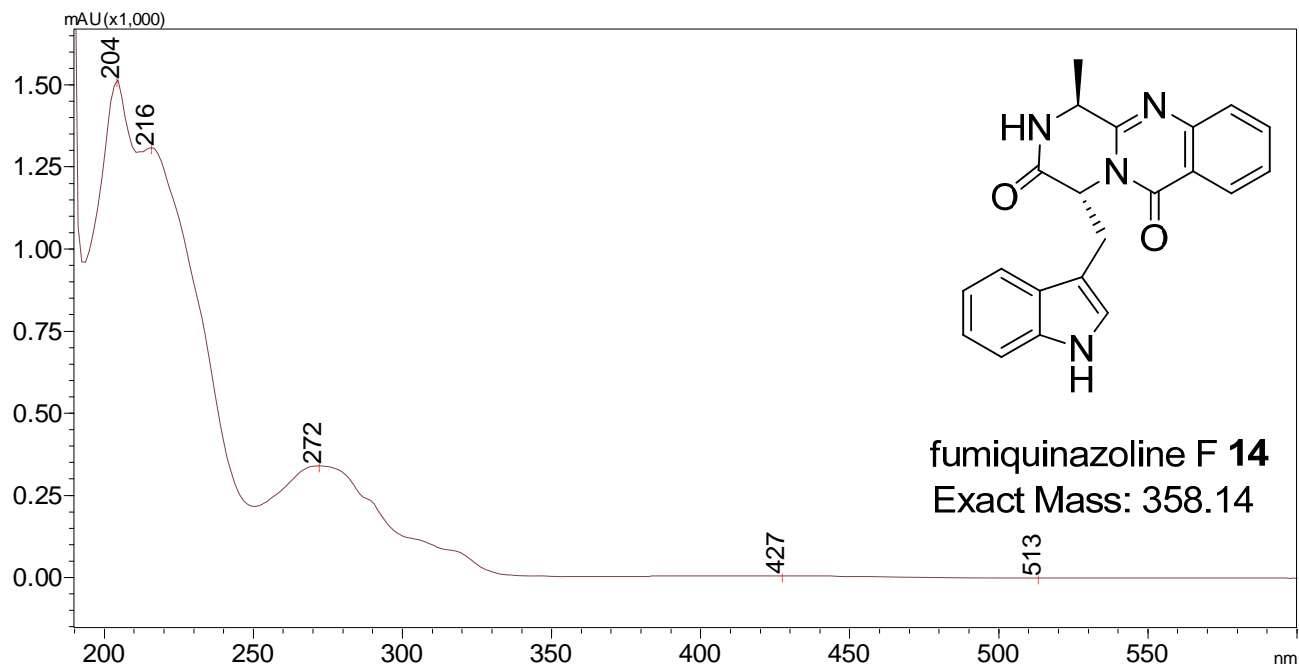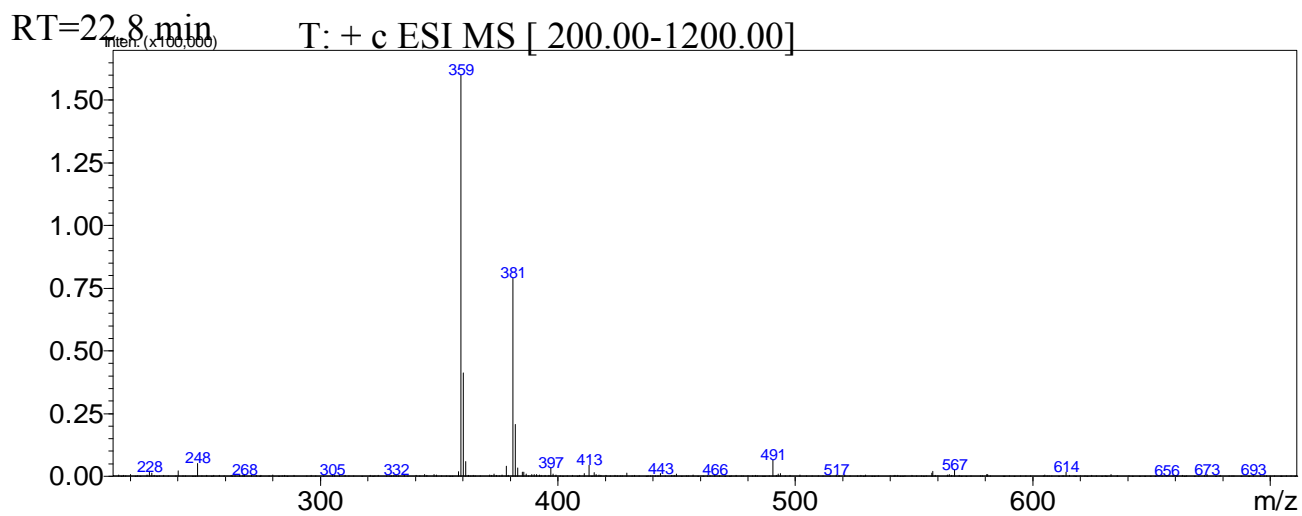

Figure S7.1 UV spectrum and MS Measured during LC-MS for **14**



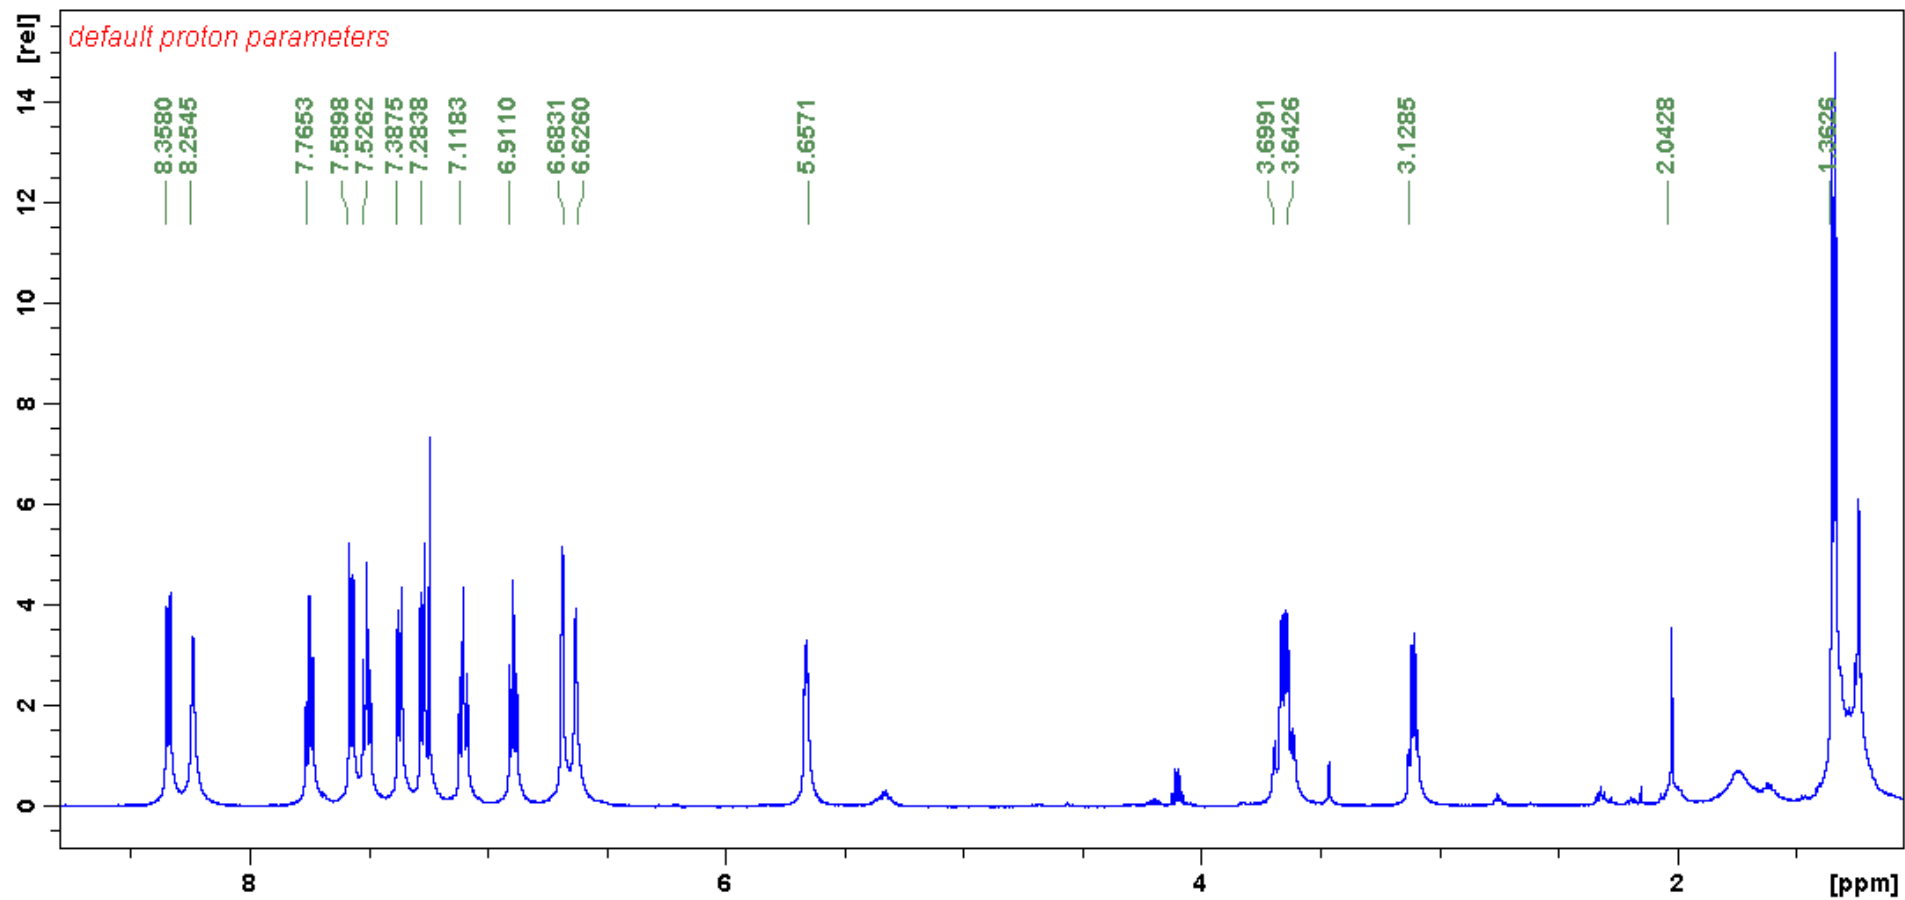

Figure S7.2  $^1\text{H}$  NMR spectrum of **14**. Measured in  $\text{CDCl}_3$  at 500MHz

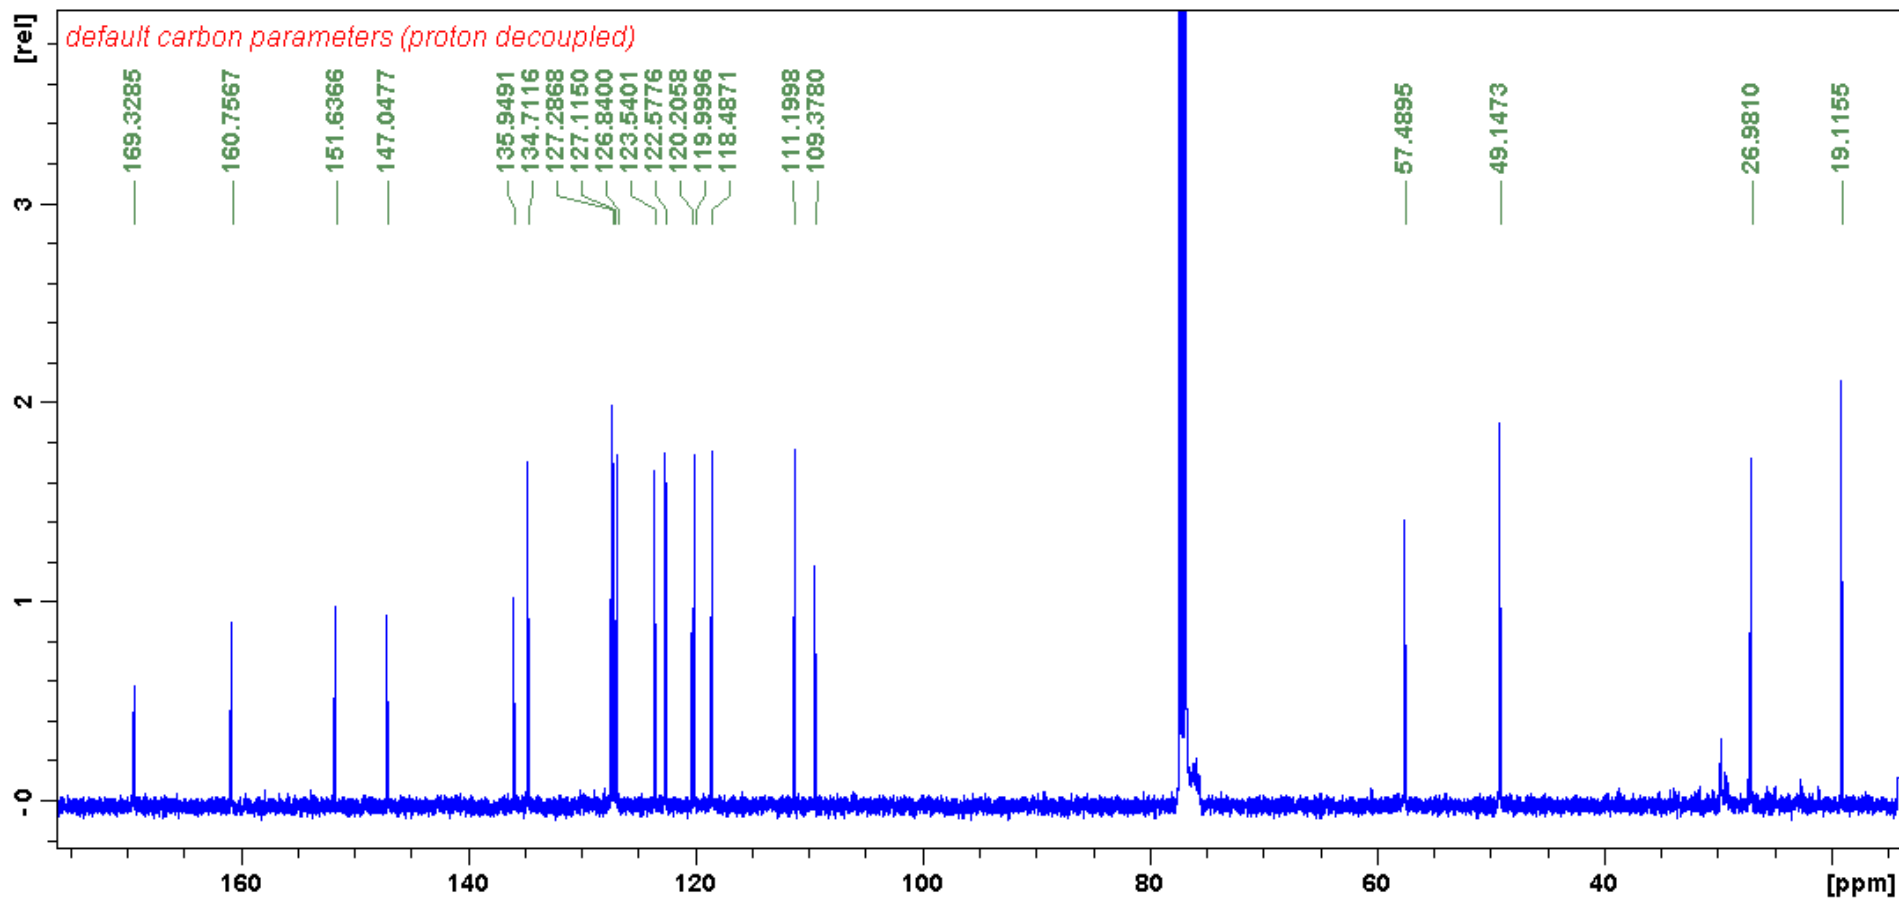

Figure S7.3  $^{13}\text{C}$  NMR spectrum of **14**. Measured in  $\text{CDCl}_3$  at 125MHz



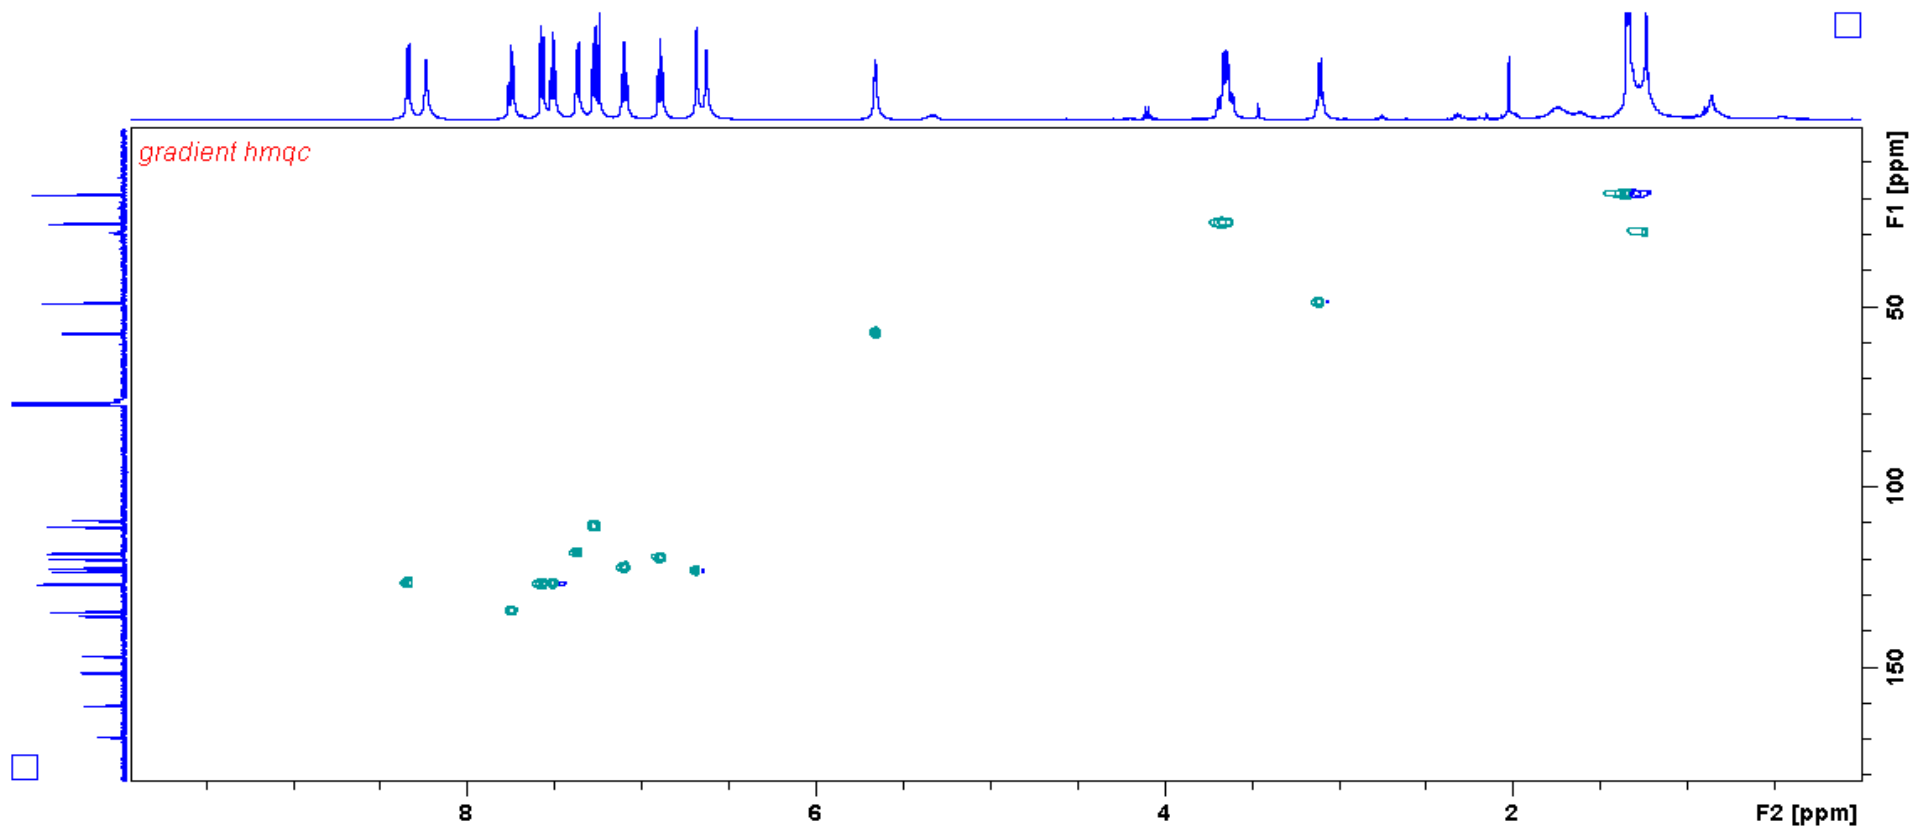

Figure S7.5  $^1\text{H}$ - $^{13}\text{C}$  HMQC NMR spectrum of **14**.

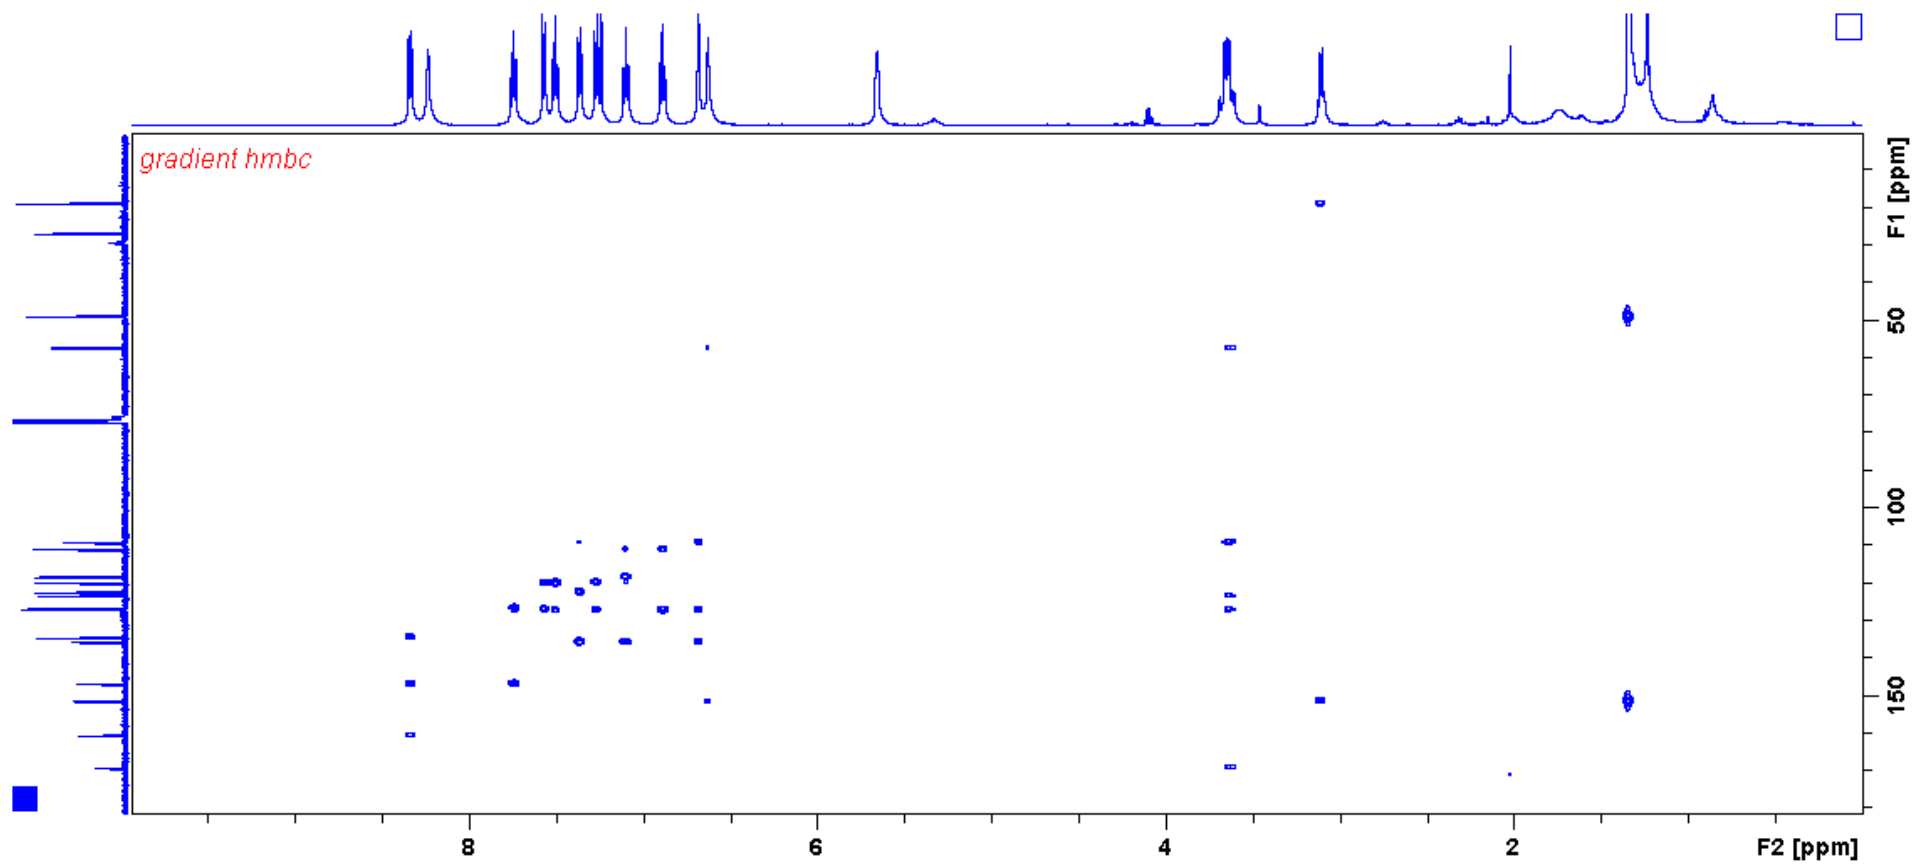

Figure S7.6  $^1\text{H}$ - $^{13}\text{C}$  HMBC NMR spectrum of **14**.

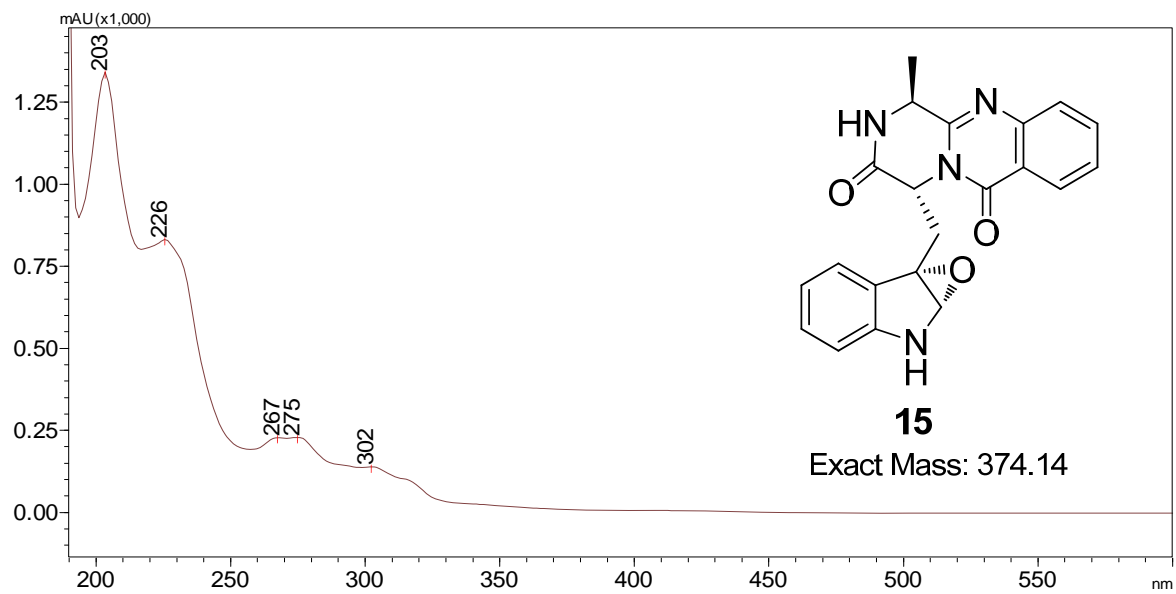

RT=19.6 min T: + c ESI MS [ 200.00-1200.00]

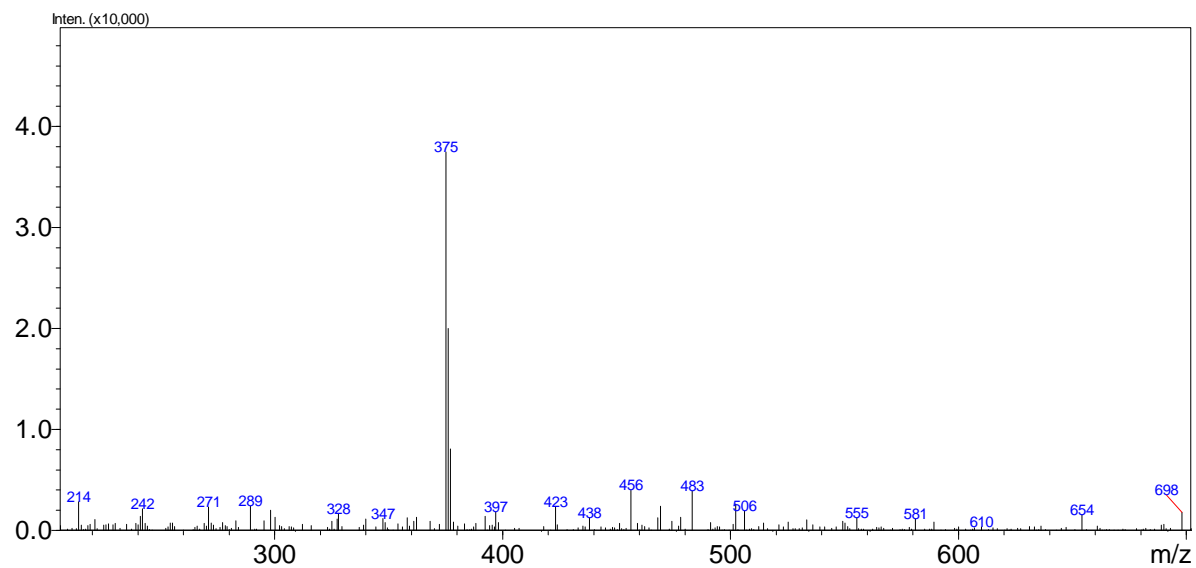

Figure S8 UV spectrum and MS Measured during LC-MS for **15**

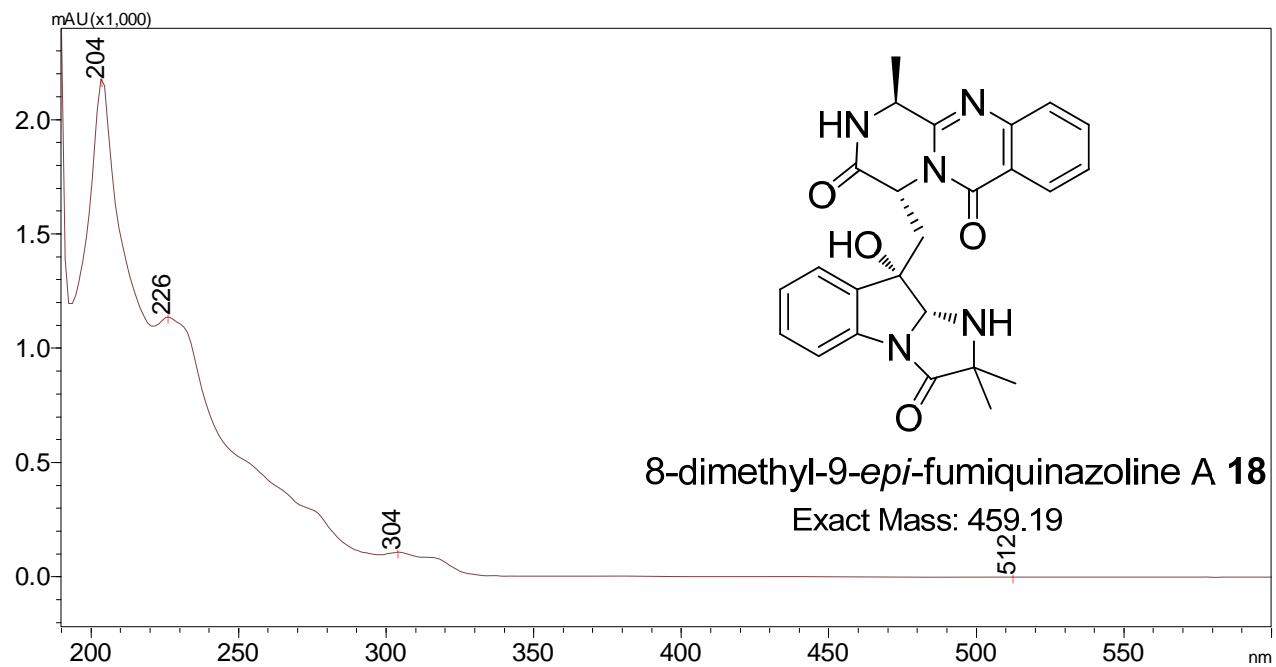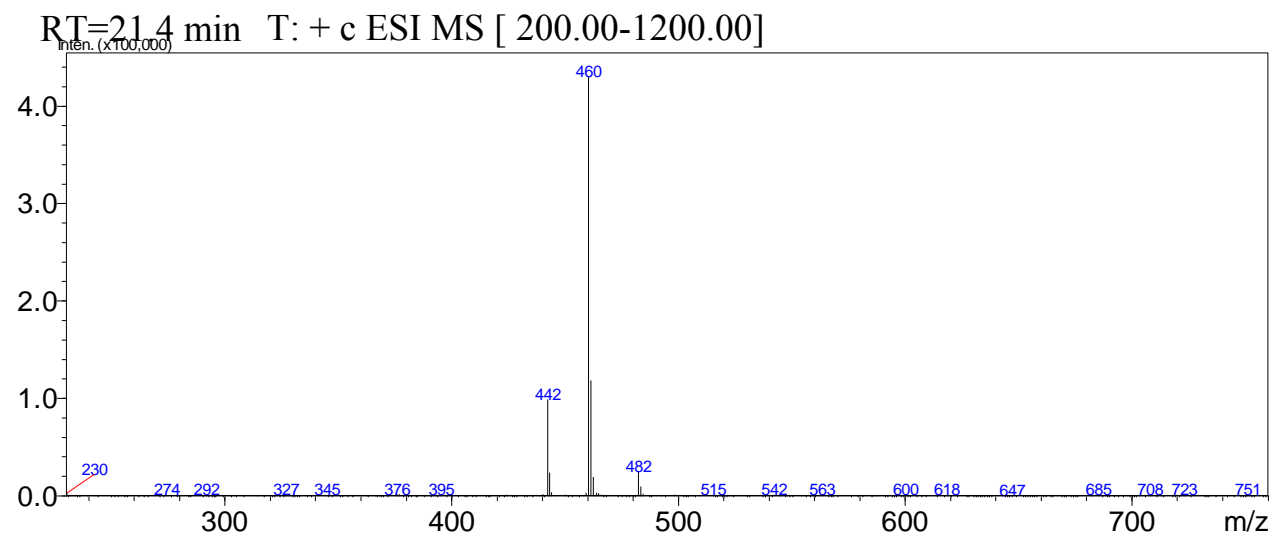

Figure S9.1 UV spectrum and MS Measured during LC-MS for **18**

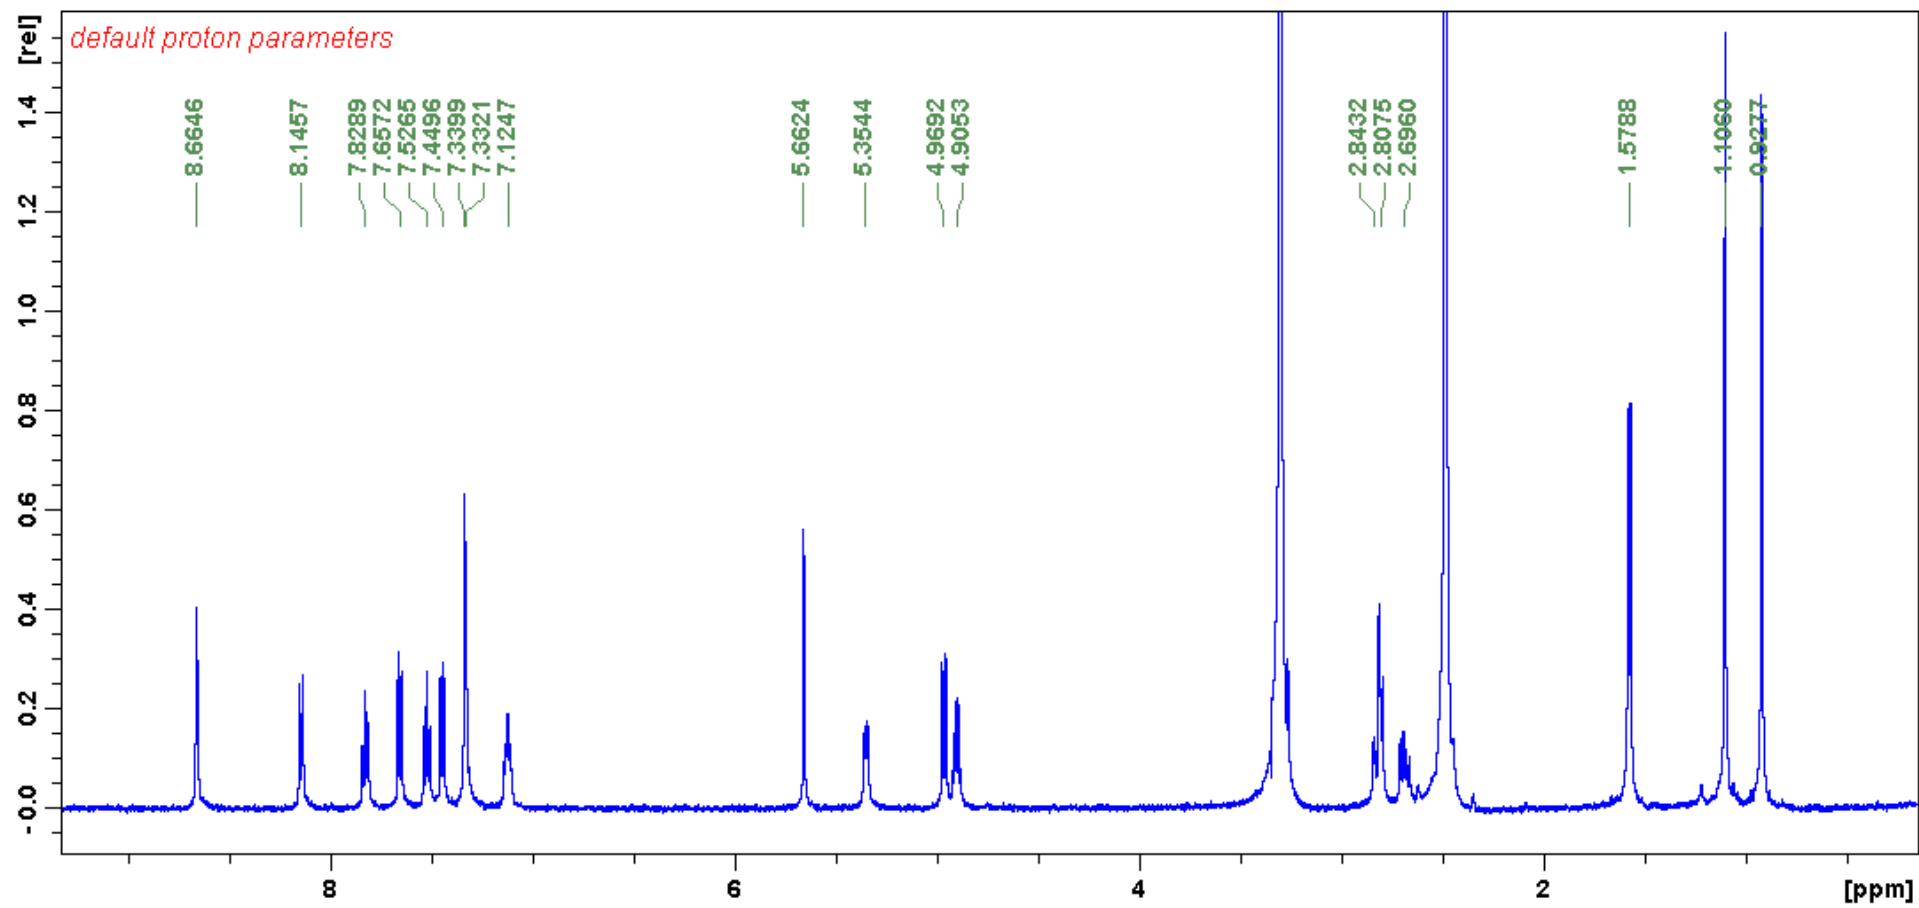

Figure S9.2  $^1\text{H}$  NMR spectrum of **18**. Measured in  $\text{DMSO-}d_6$  at 500MHz



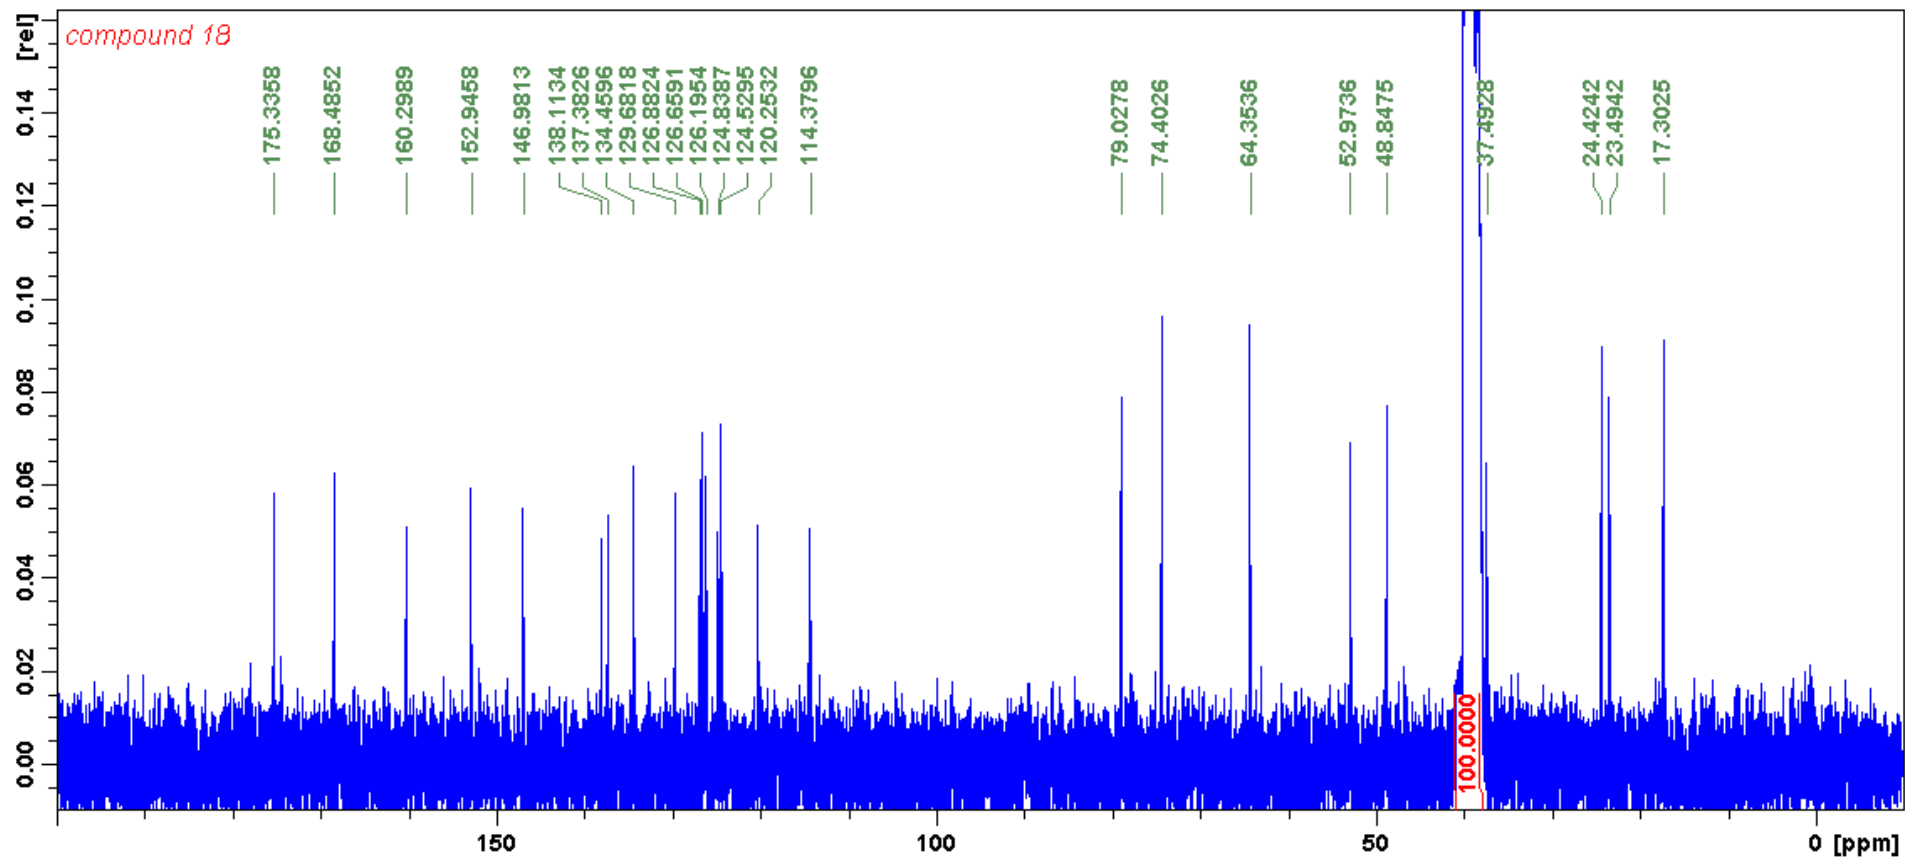

Figure S9.3  $^{13}\text{C}$  NMR spectrum of **18**. Measured in  $\text{DMSO-}d_6$  at 125MHz

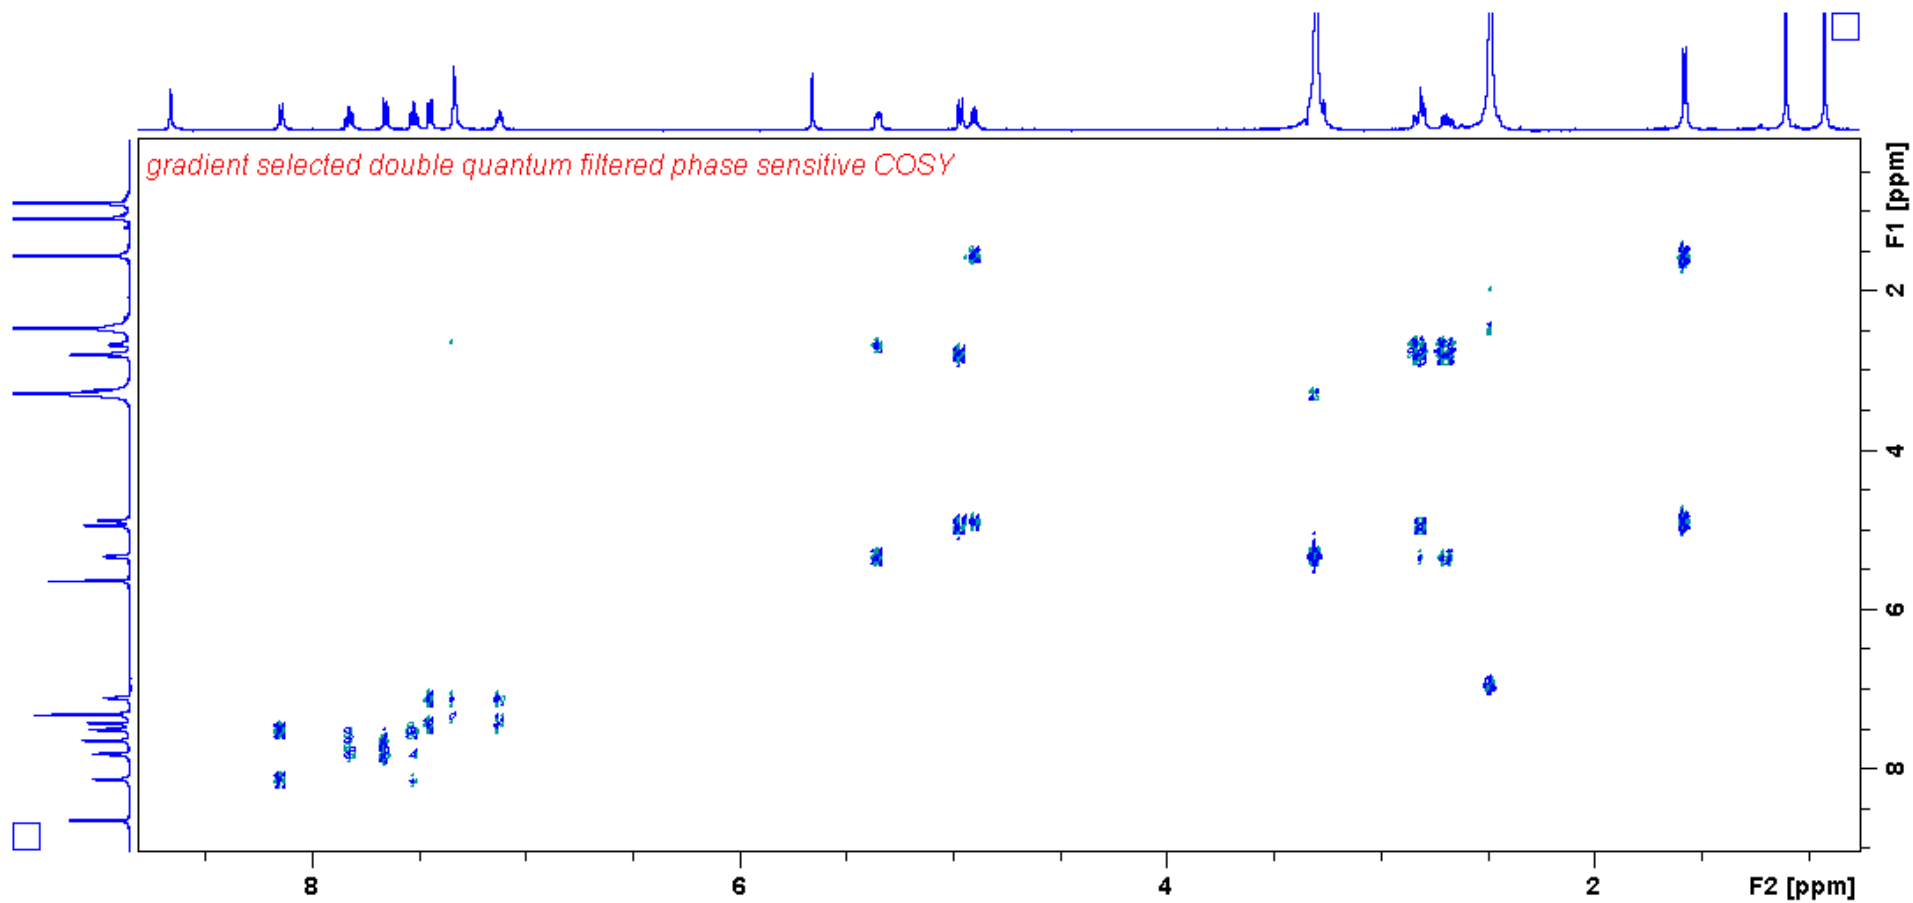

Figure S9.4  $^1\text{H}$ - $^1\text{H}$  COSY NMR spectrum of **18**.

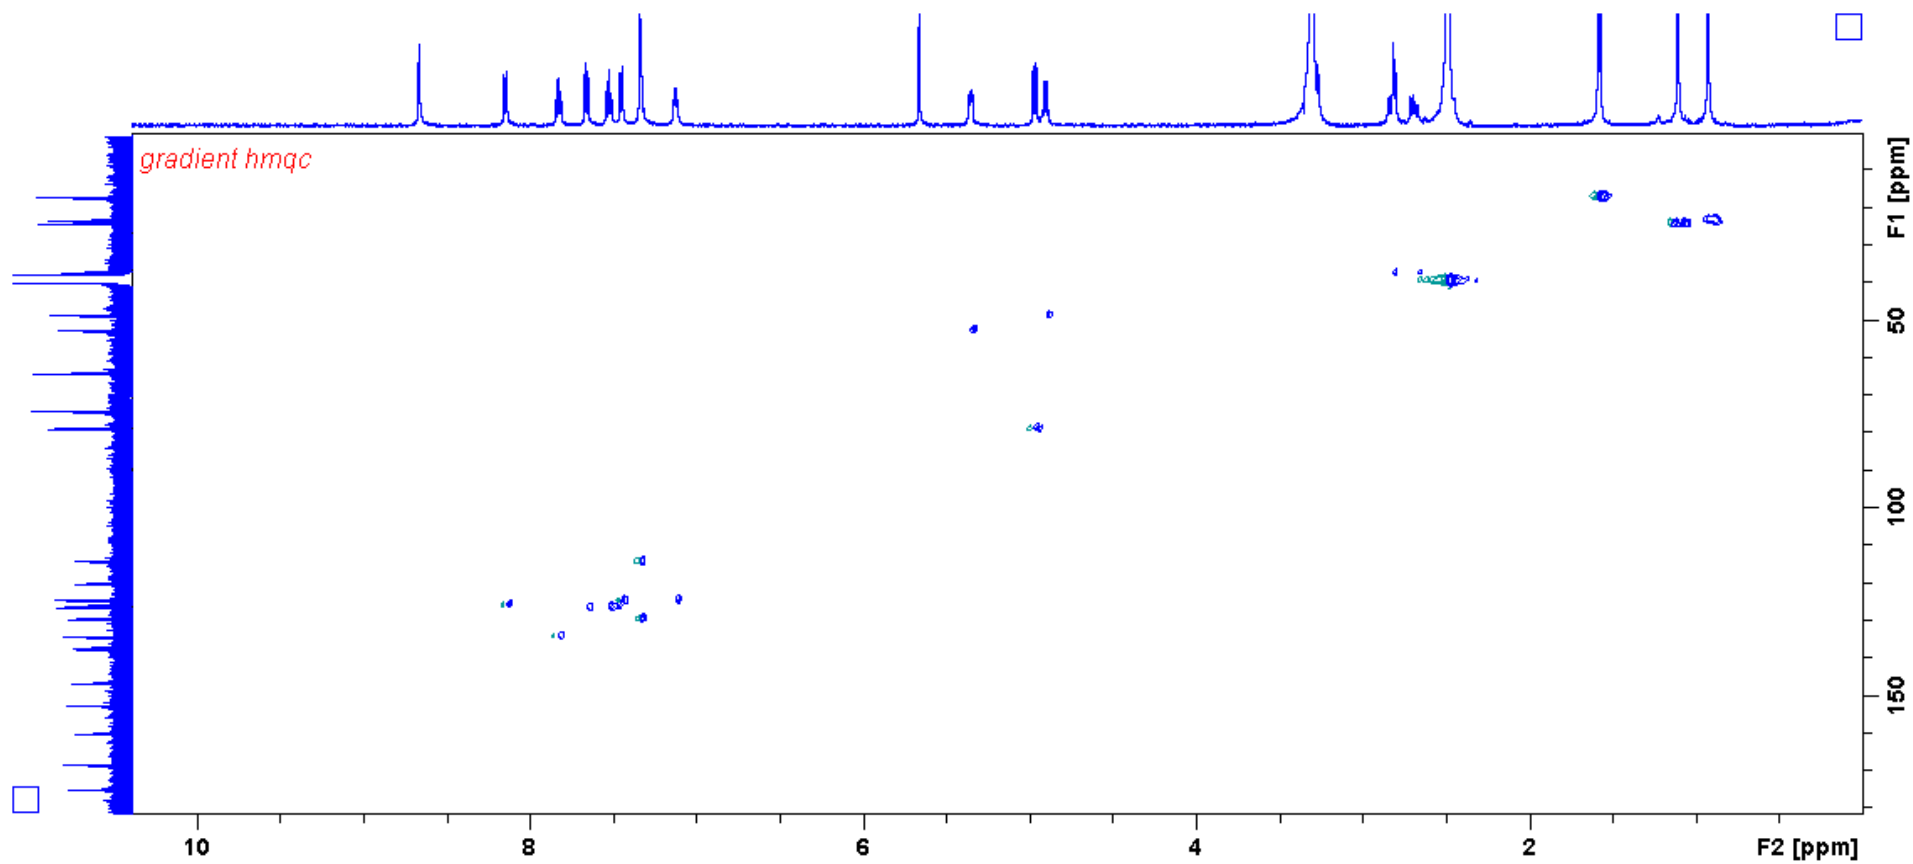

Figure S9.5  $^1\text{H}$ - $^{13}\text{C}$  HMQC NMR spectrum of **18**.

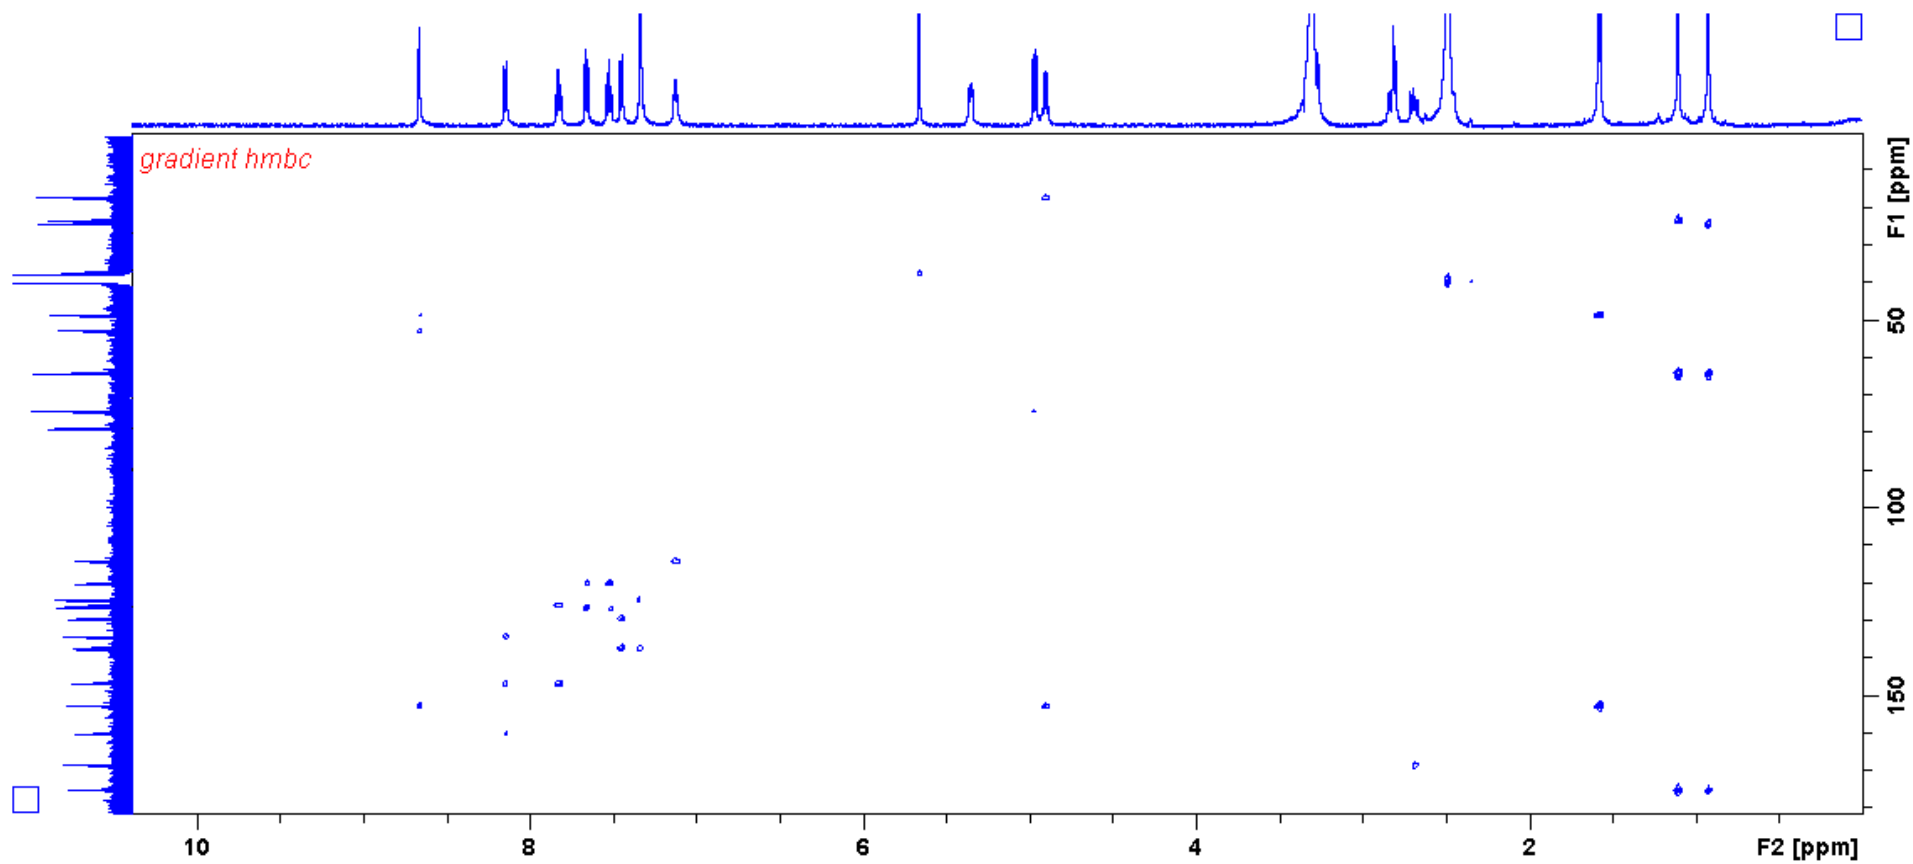

Figure S9.6  $^1\text{H}$ - $^{13}\text{C}$  HMBC NMR spectrum of **18**.

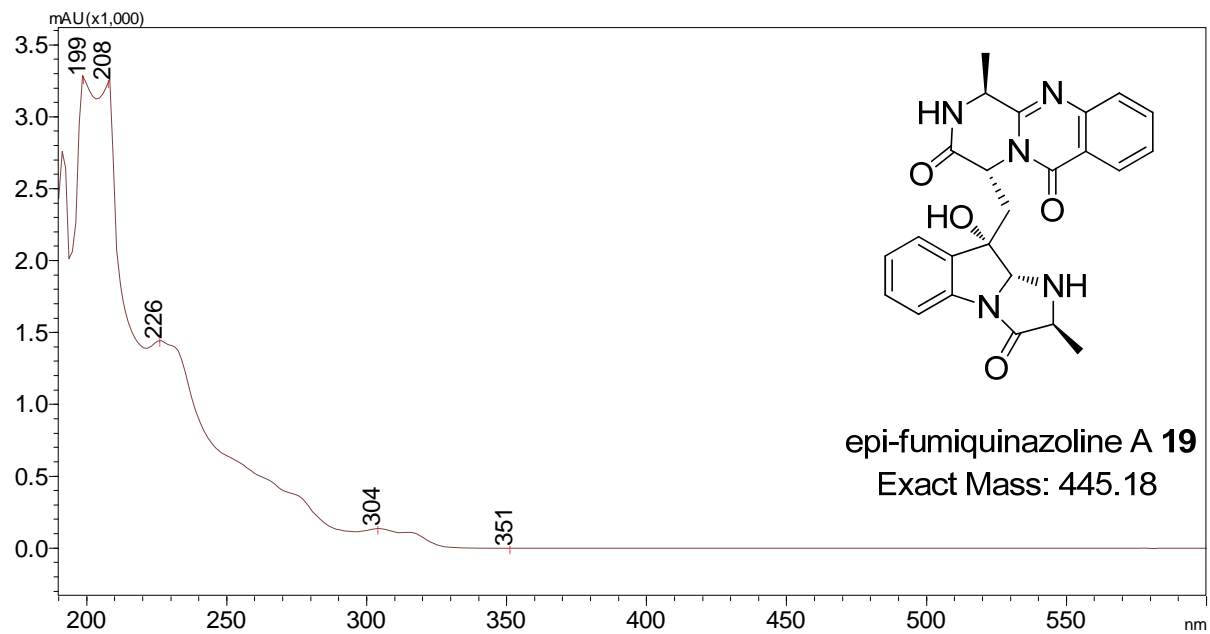

RT=19.3 min T: + c ESI MS [ 200.00-1200.00]

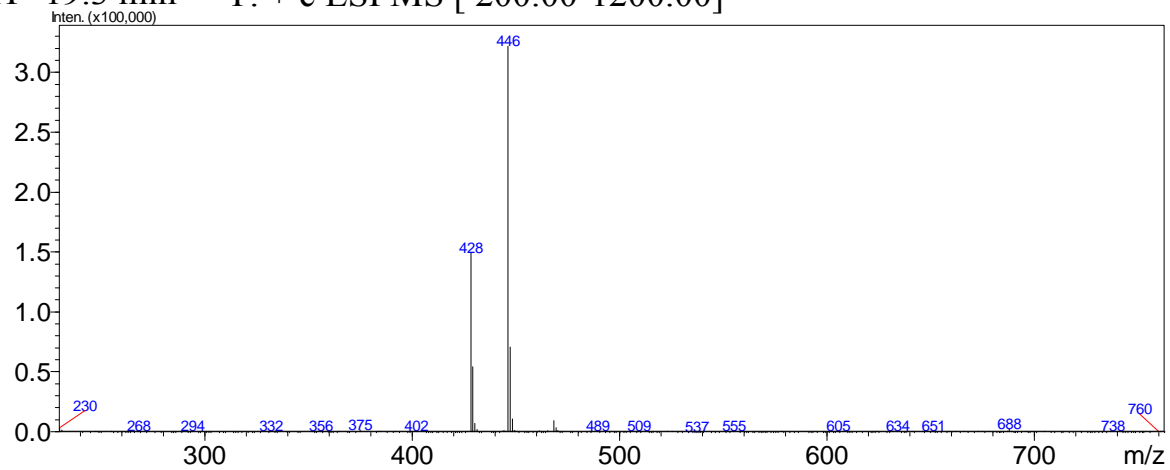

Figure S10.1 UV spectrum and MS Measured during LC-MS for **19**

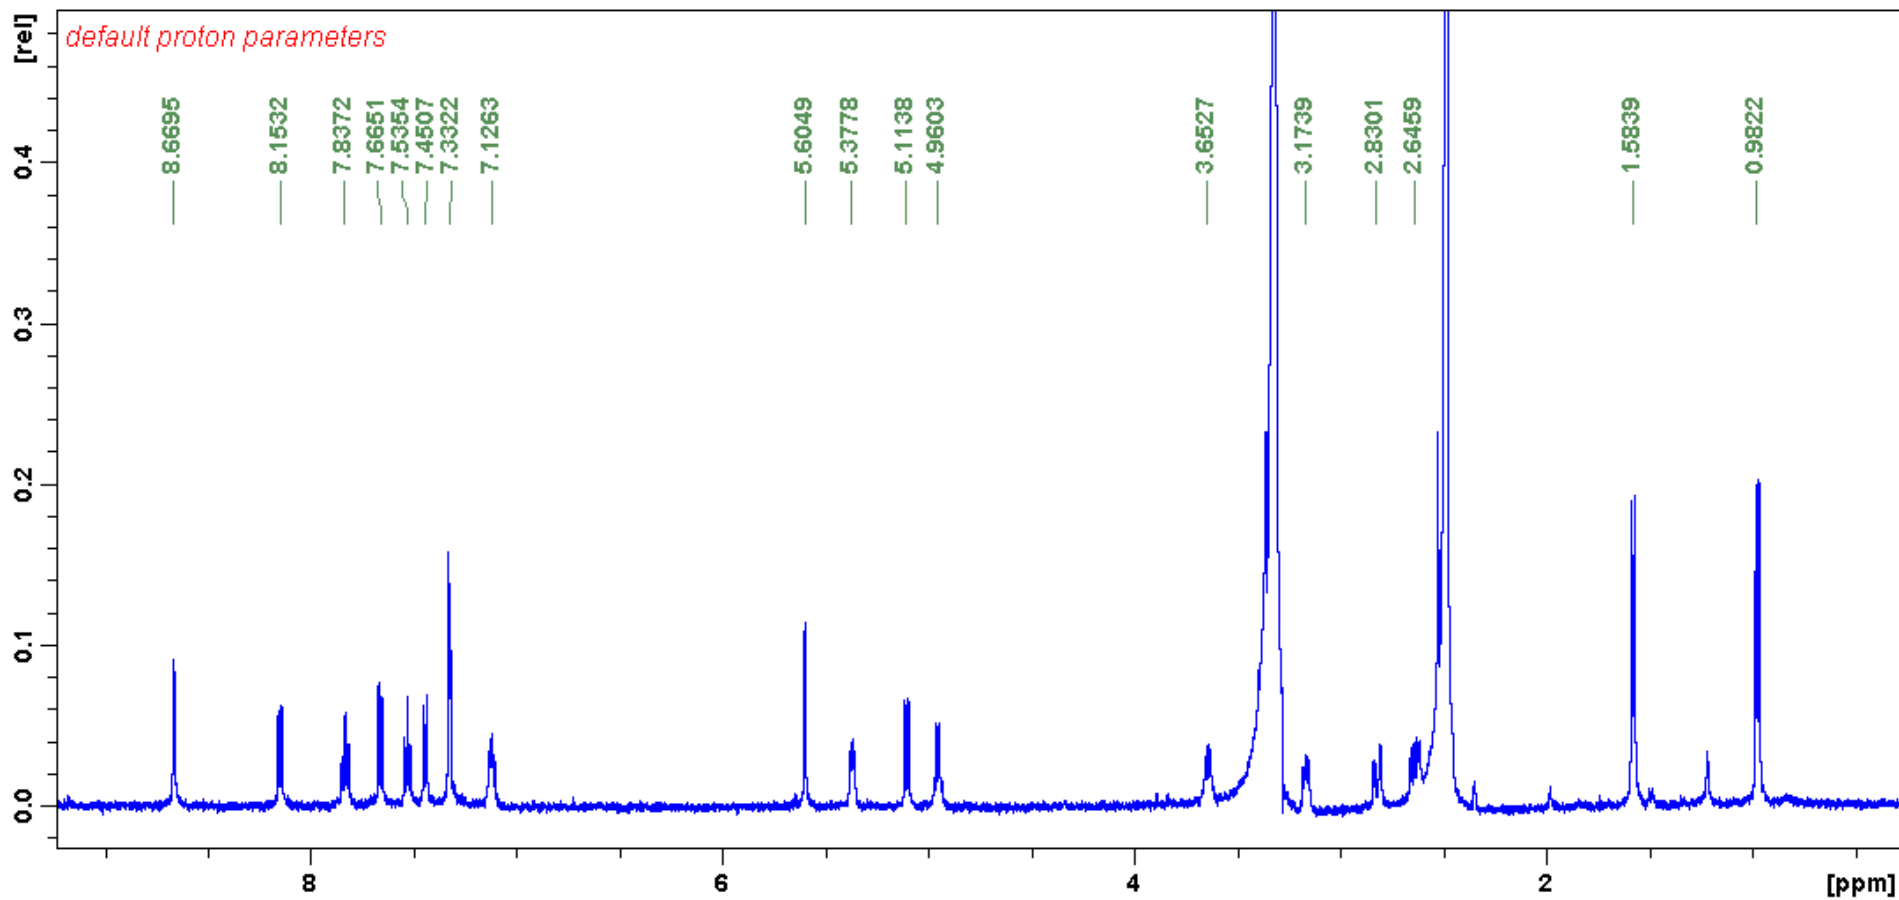

Figure S10.2  $^1\text{H}$  NMR spectrum of **19**. Measured in  $\text{DMSO-}d_6$  at 500MHz

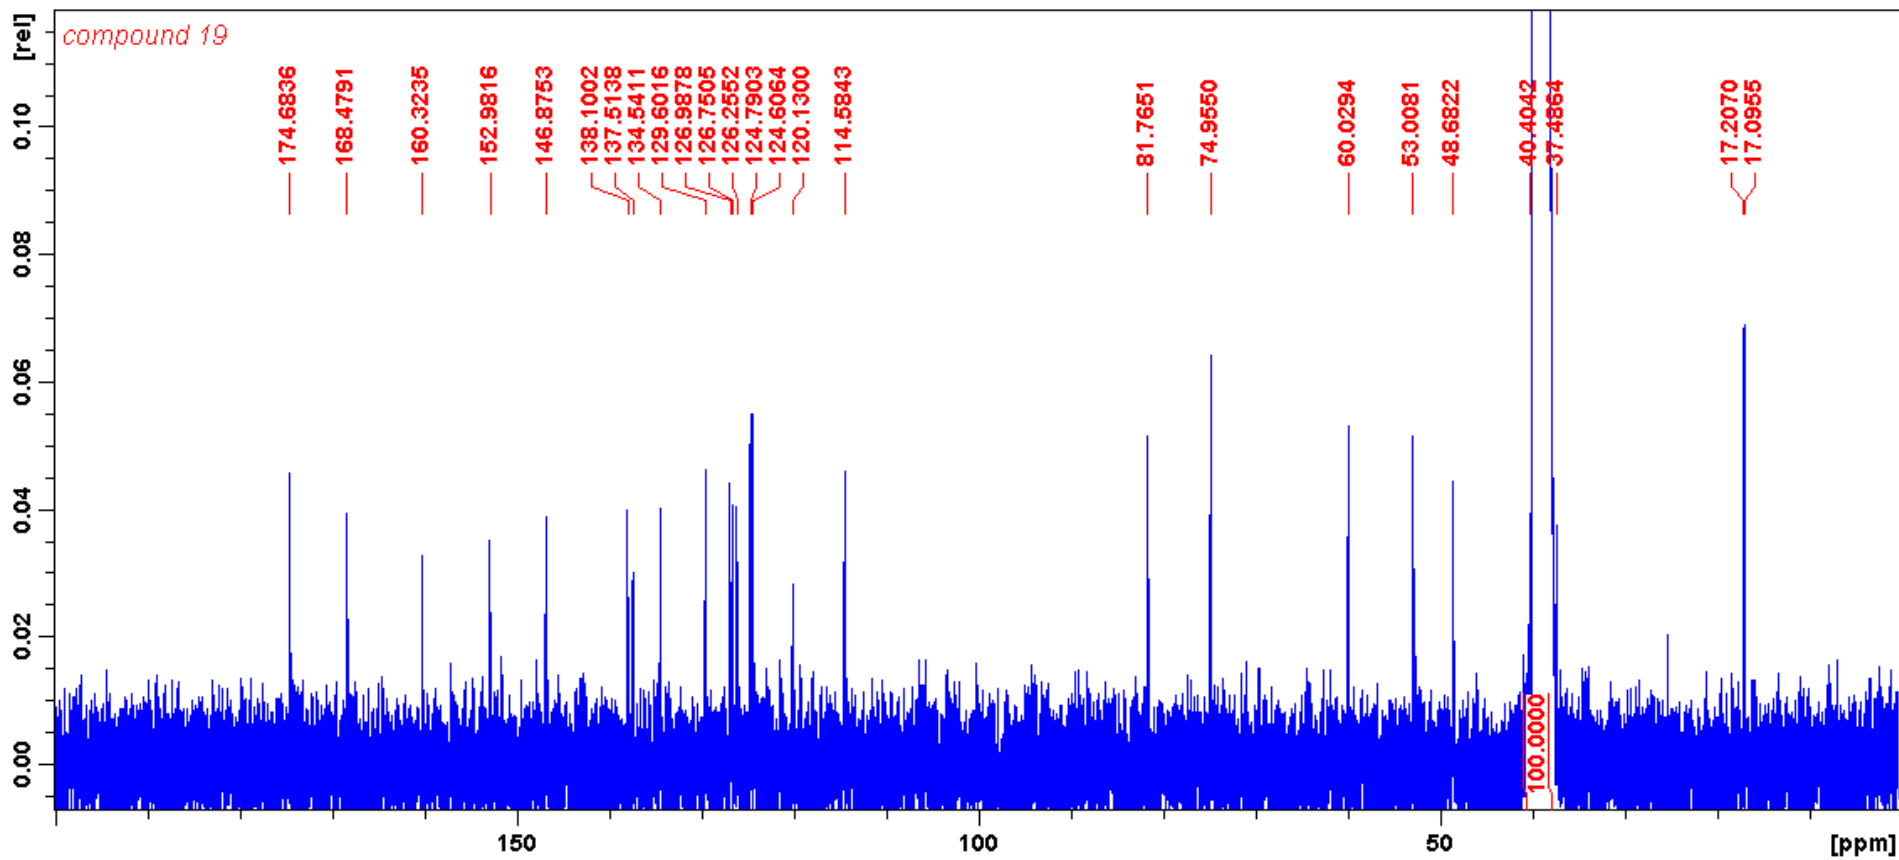

Figure S10.3  $^{13}\text{C}$  NMR spectrum of **19**. Measured in  $\text{DMSO-}d_6$  at 125MHz

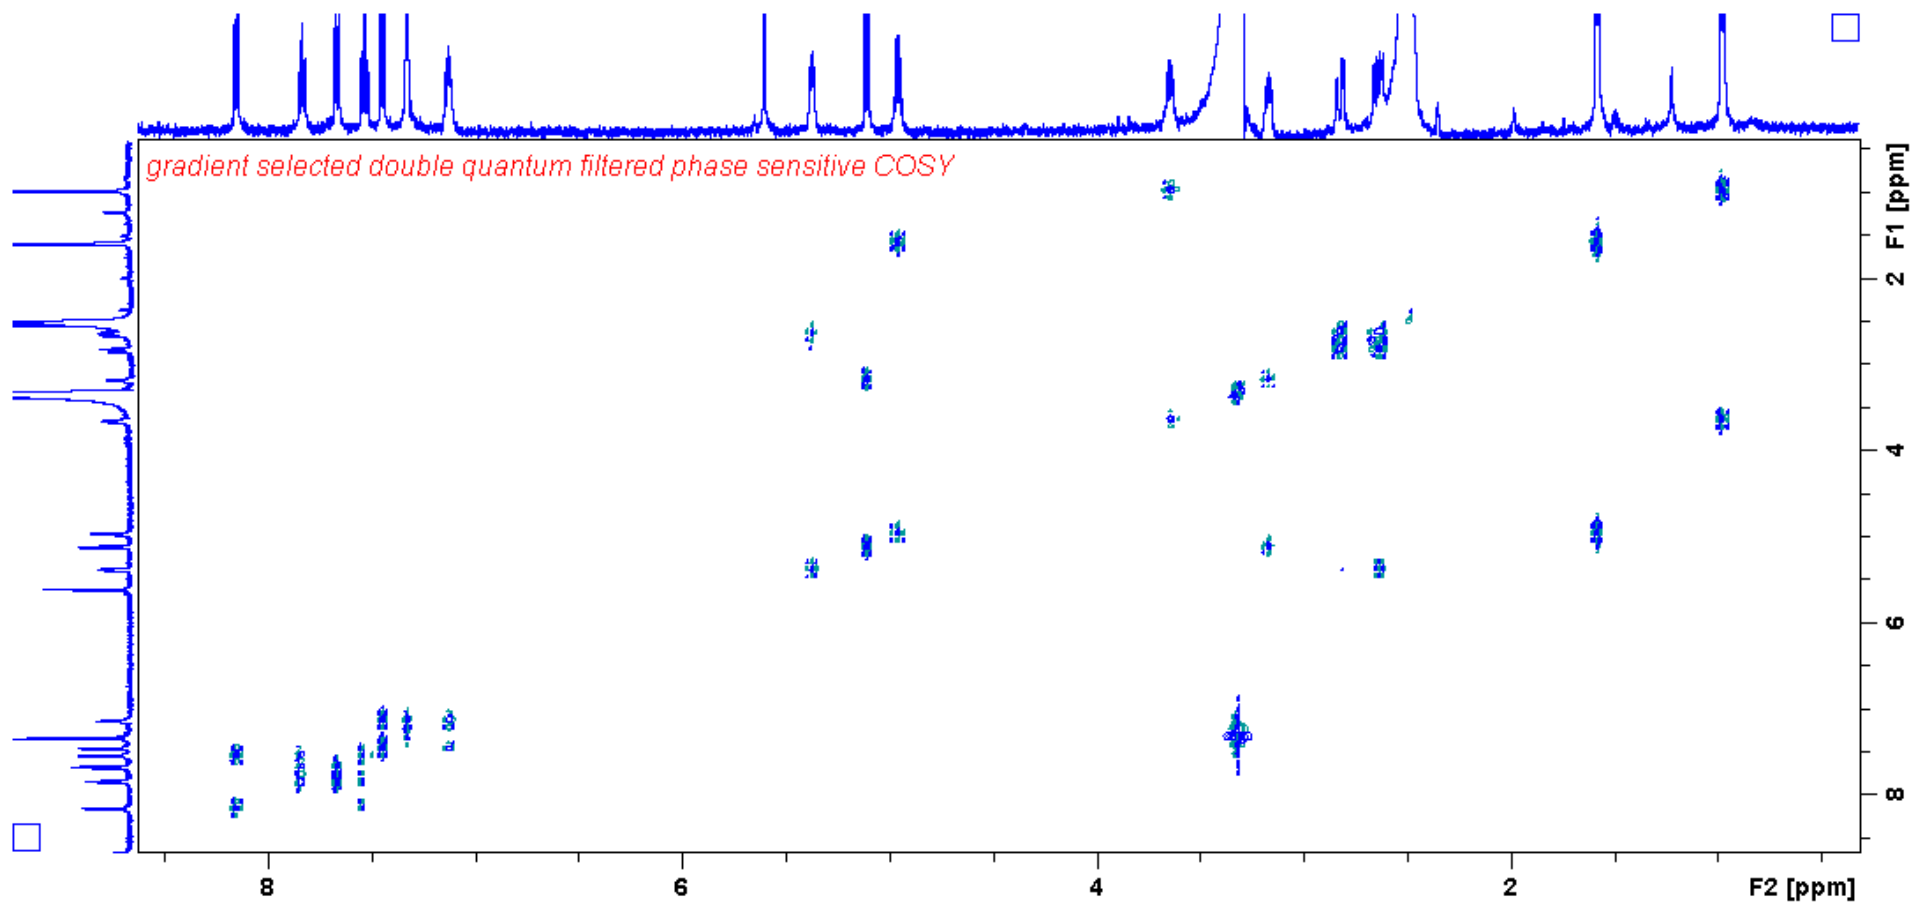

Figure S10.4  $^1\text{H}$ - $^1\text{H}$  COSY NMR spectrum of **19**.



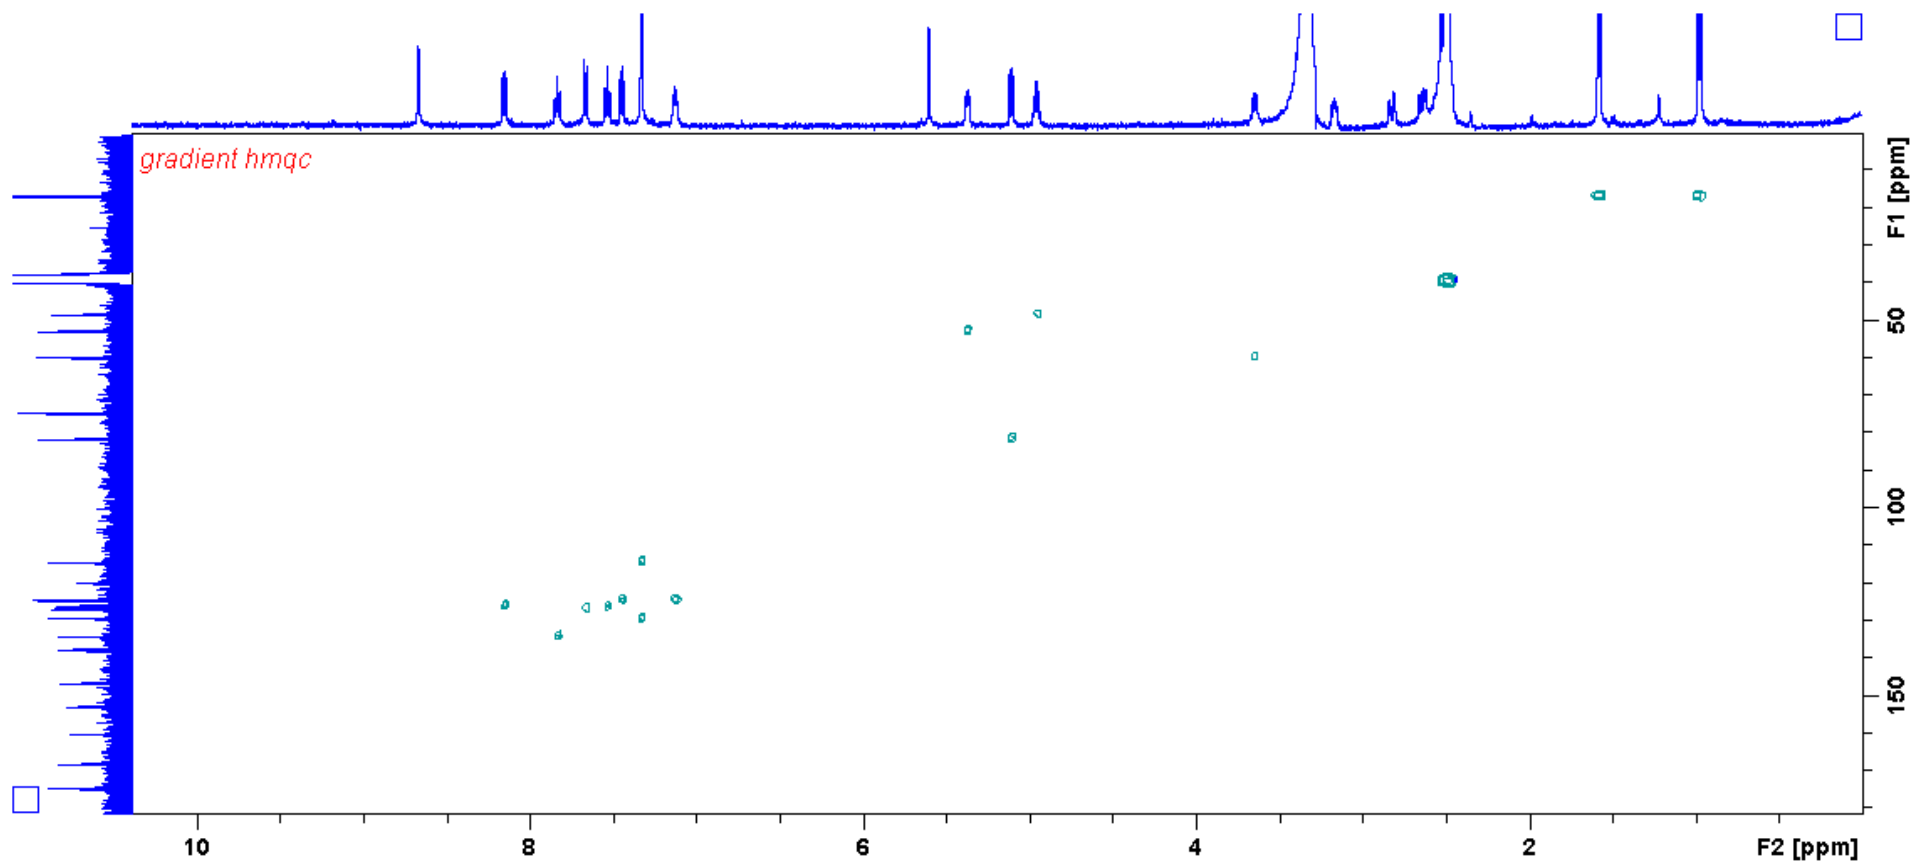

Figure S10.5  $^1\text{H}$ - $^{13}\text{C}$  HMQC NMR spectrum of **19**.

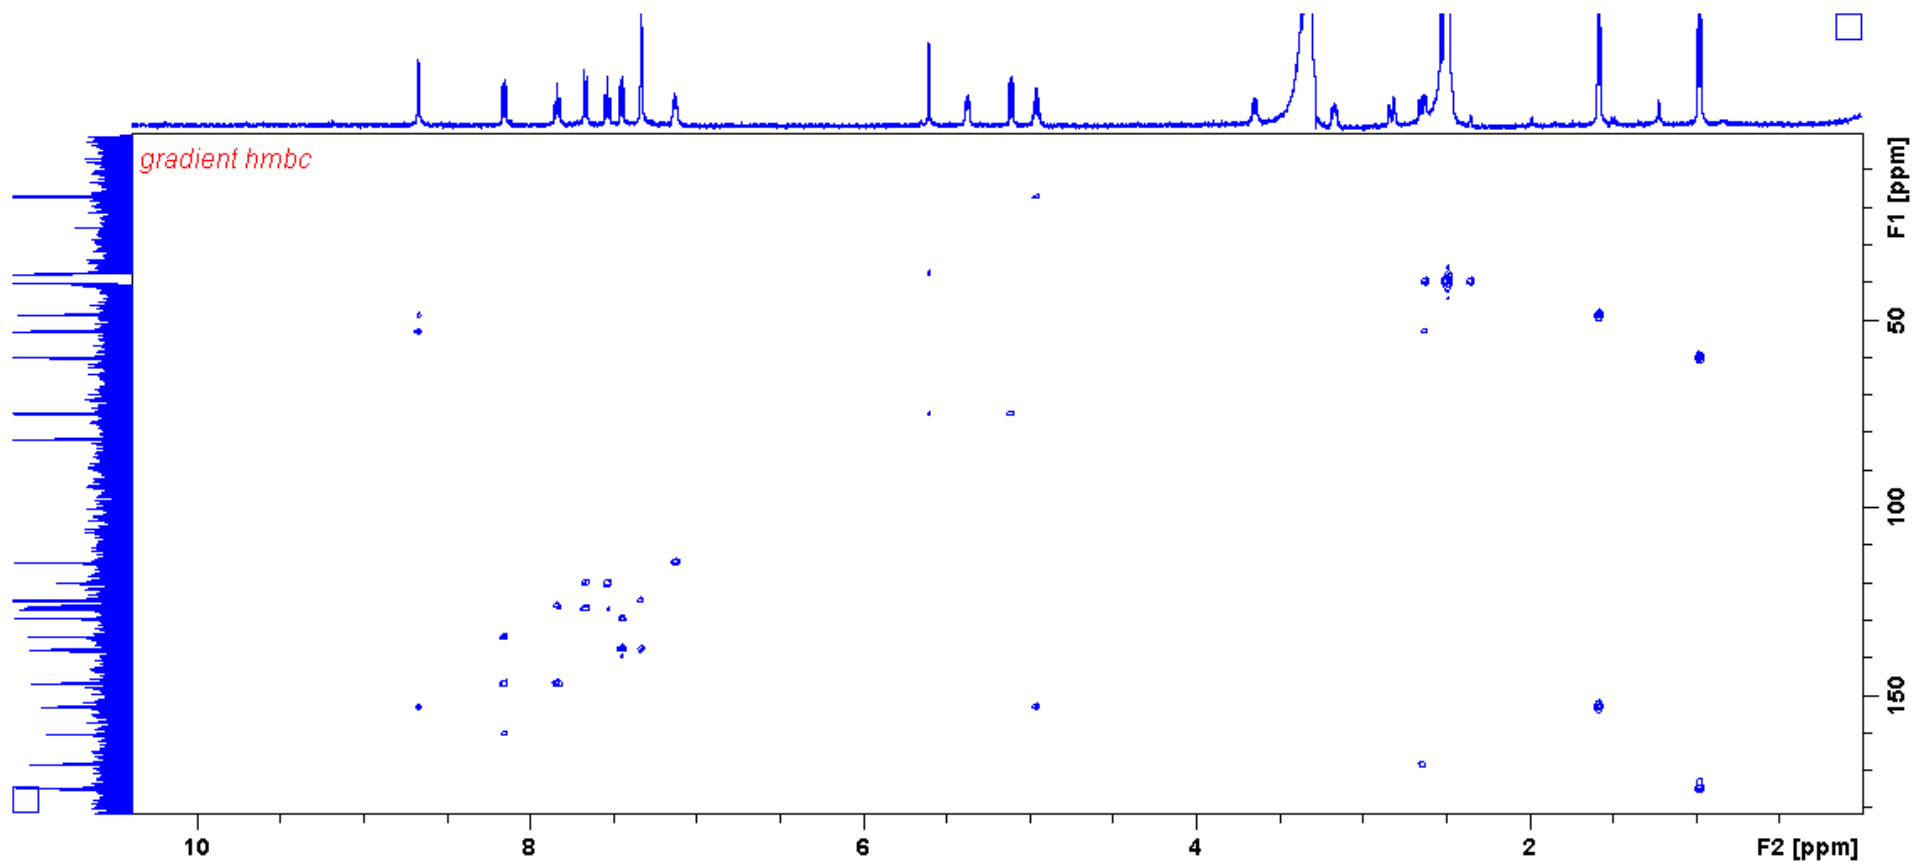

Figure S10.6  $^1\text{H}$ - $^{13}\text{C}$  HMBC NMR spectrum of **19**.

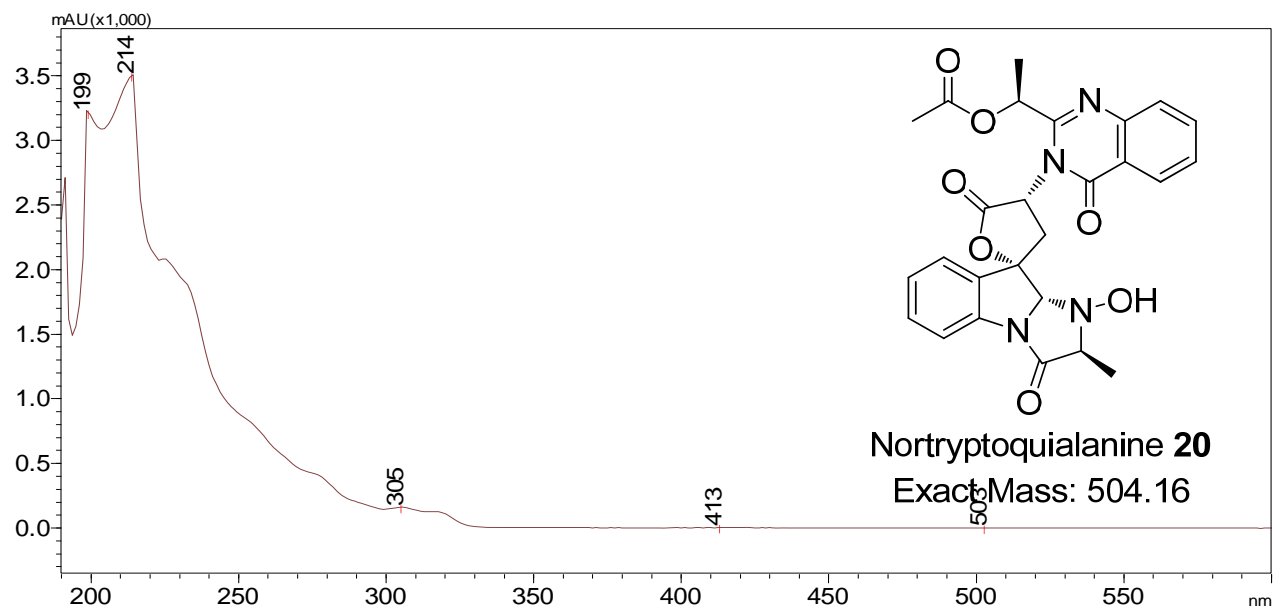

RT=26.1 min T: + c ESI MS [ 200.00-1200.00]

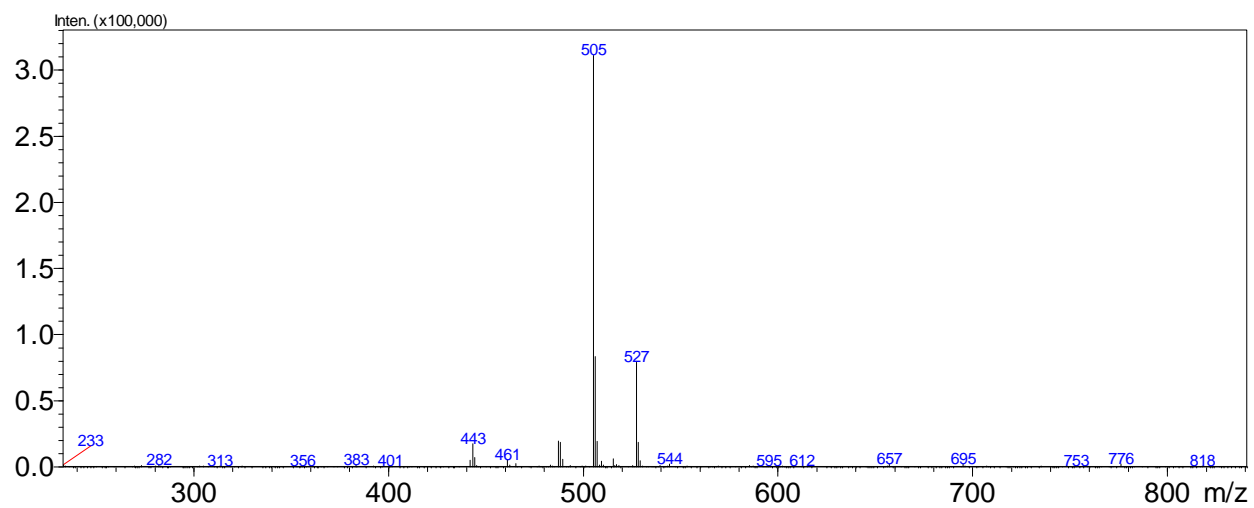

Figure S11.1 UV spectrum and MS Measured during LC-MS for **20**

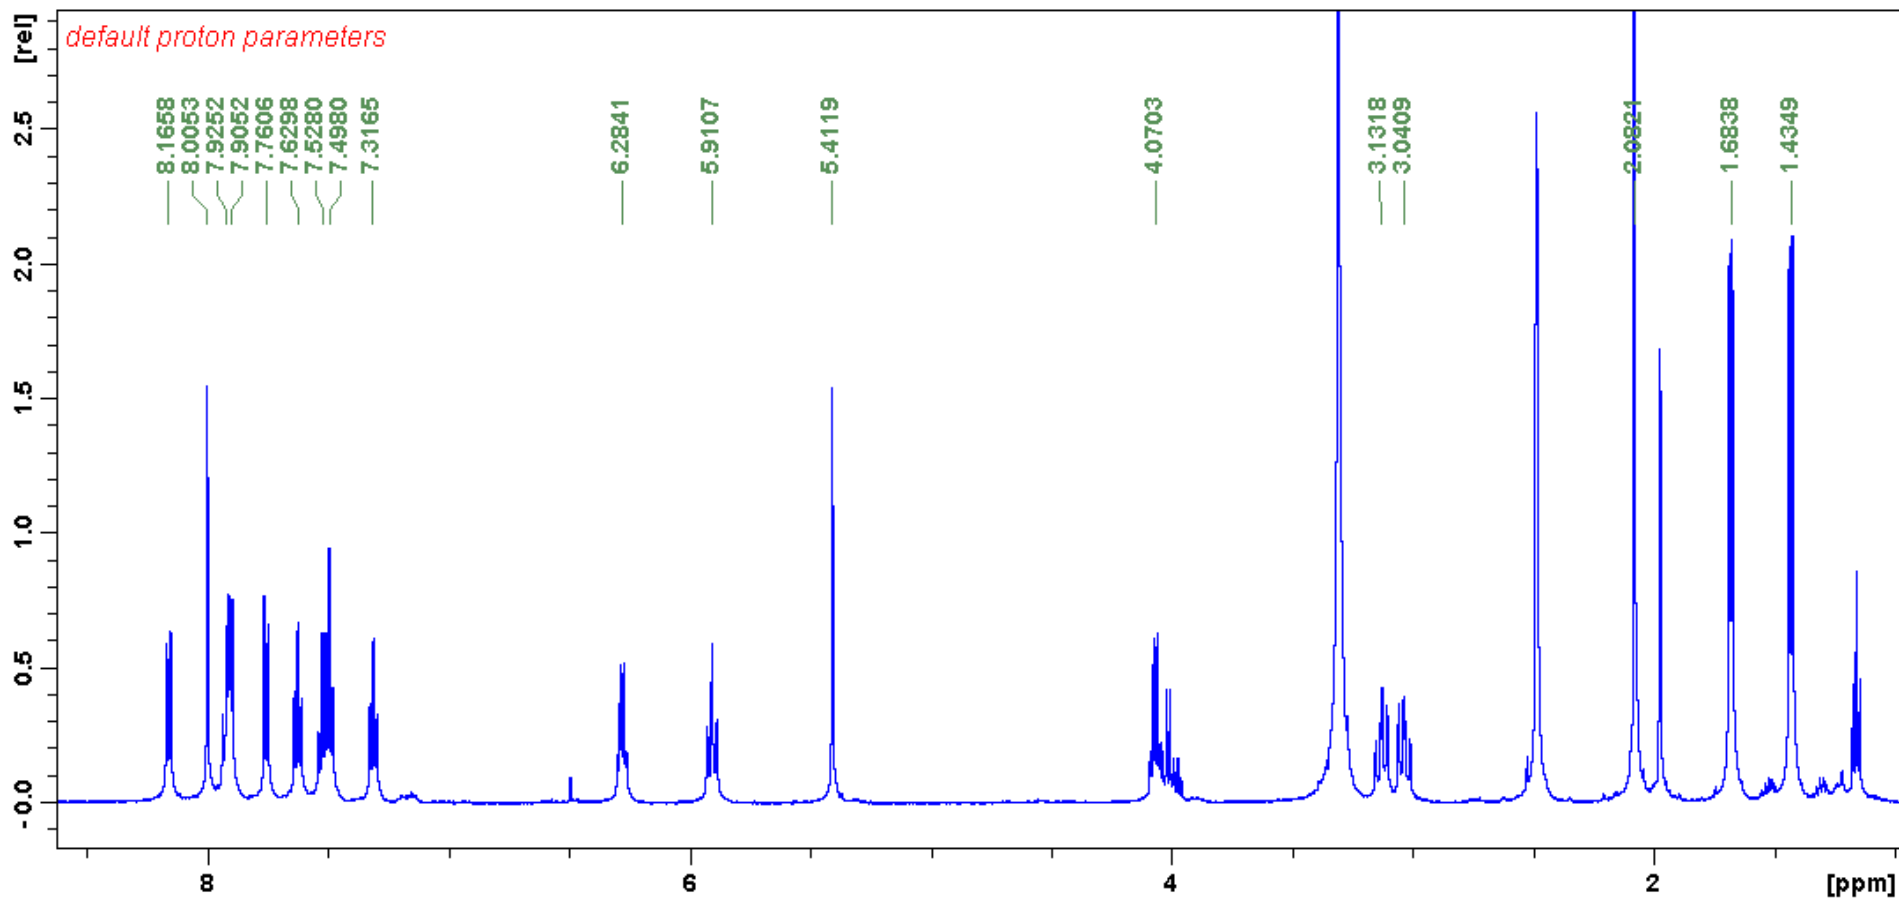

Figure S11.2  $^1\text{H}$  NMR spectrum of **20**. Measured in  $\text{DMSO-}d_6$  at 500MHz

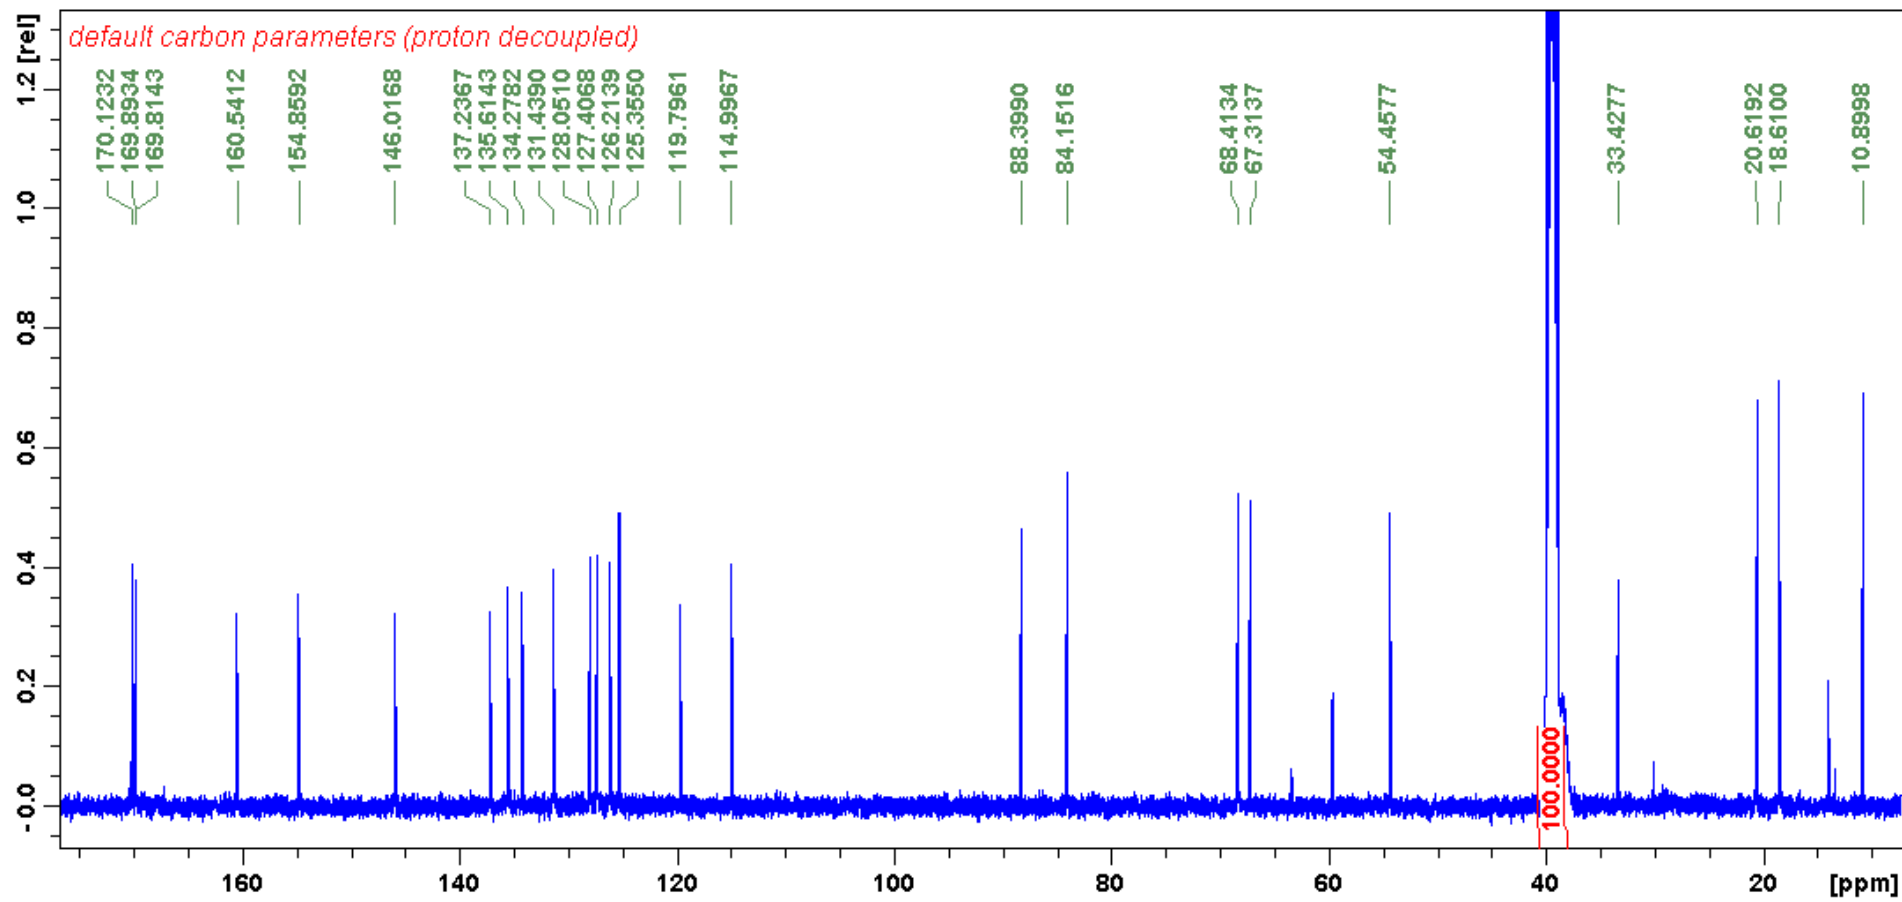

Figure S11.3  $^{13}\text{C}$  NMR spectrum of **20**. Measured in  $\text{DMSO-}d_6$  at 125MHz

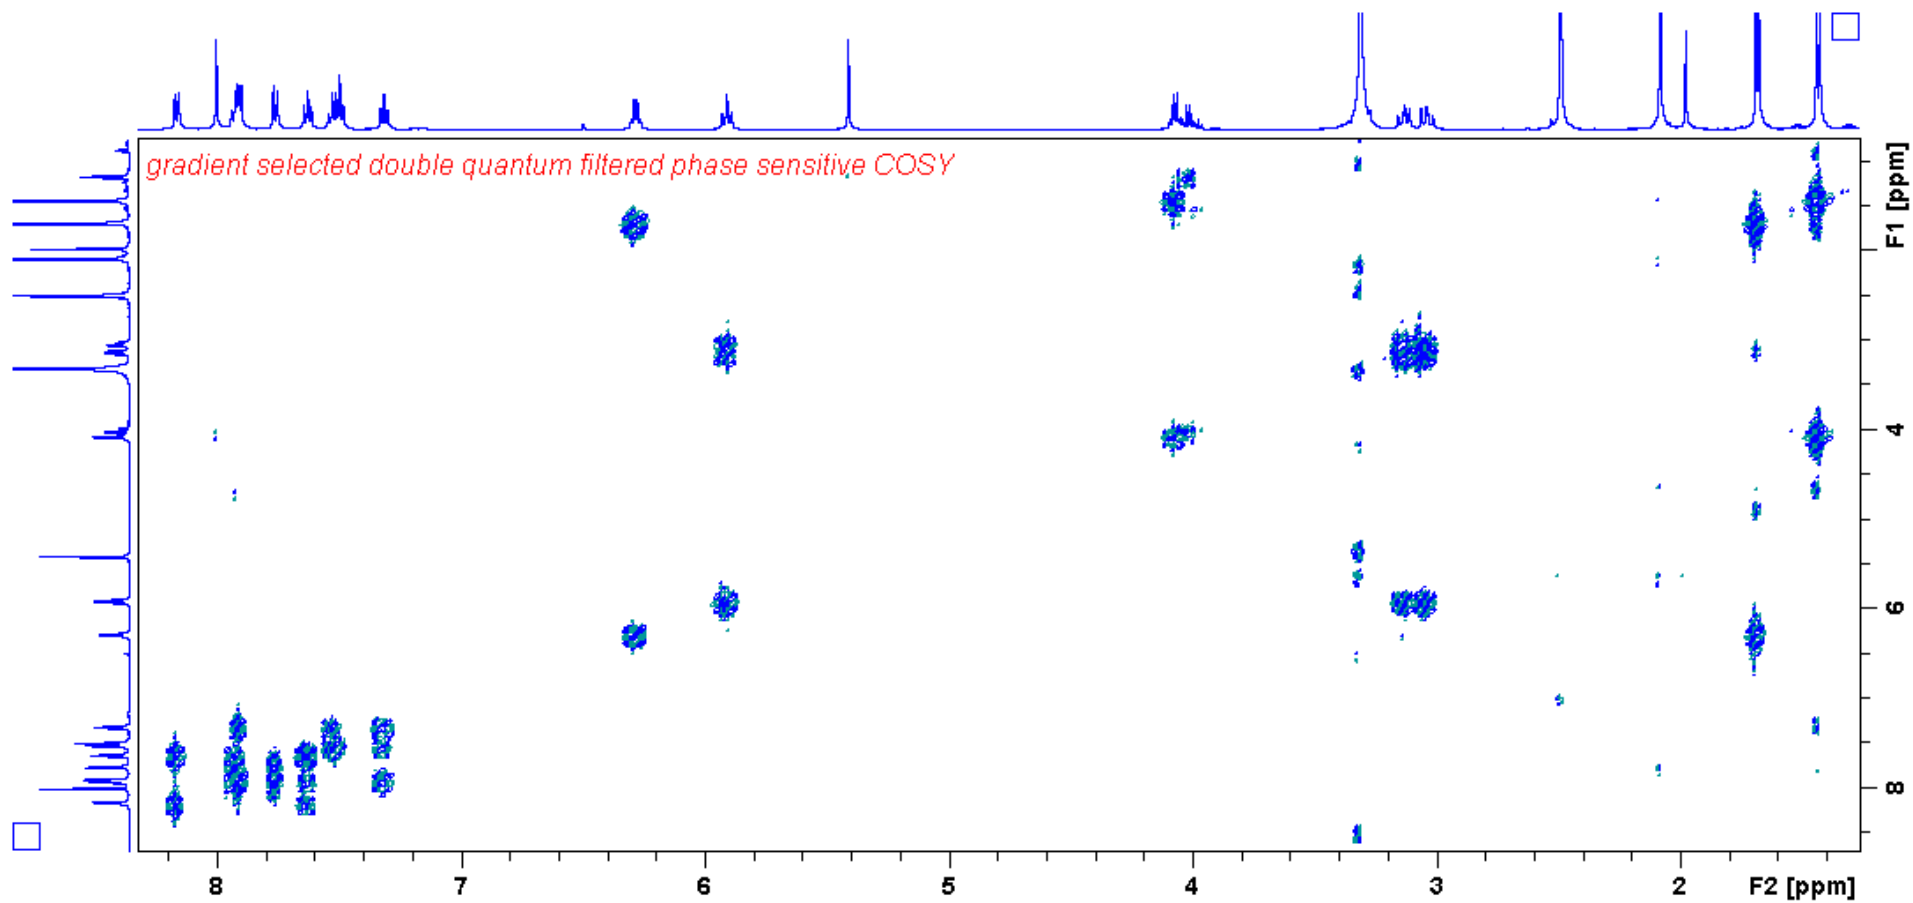

Figure S11.4  $^1\text{H}$ - $^1\text{H}$  COSY NMR spectrum of **20**.

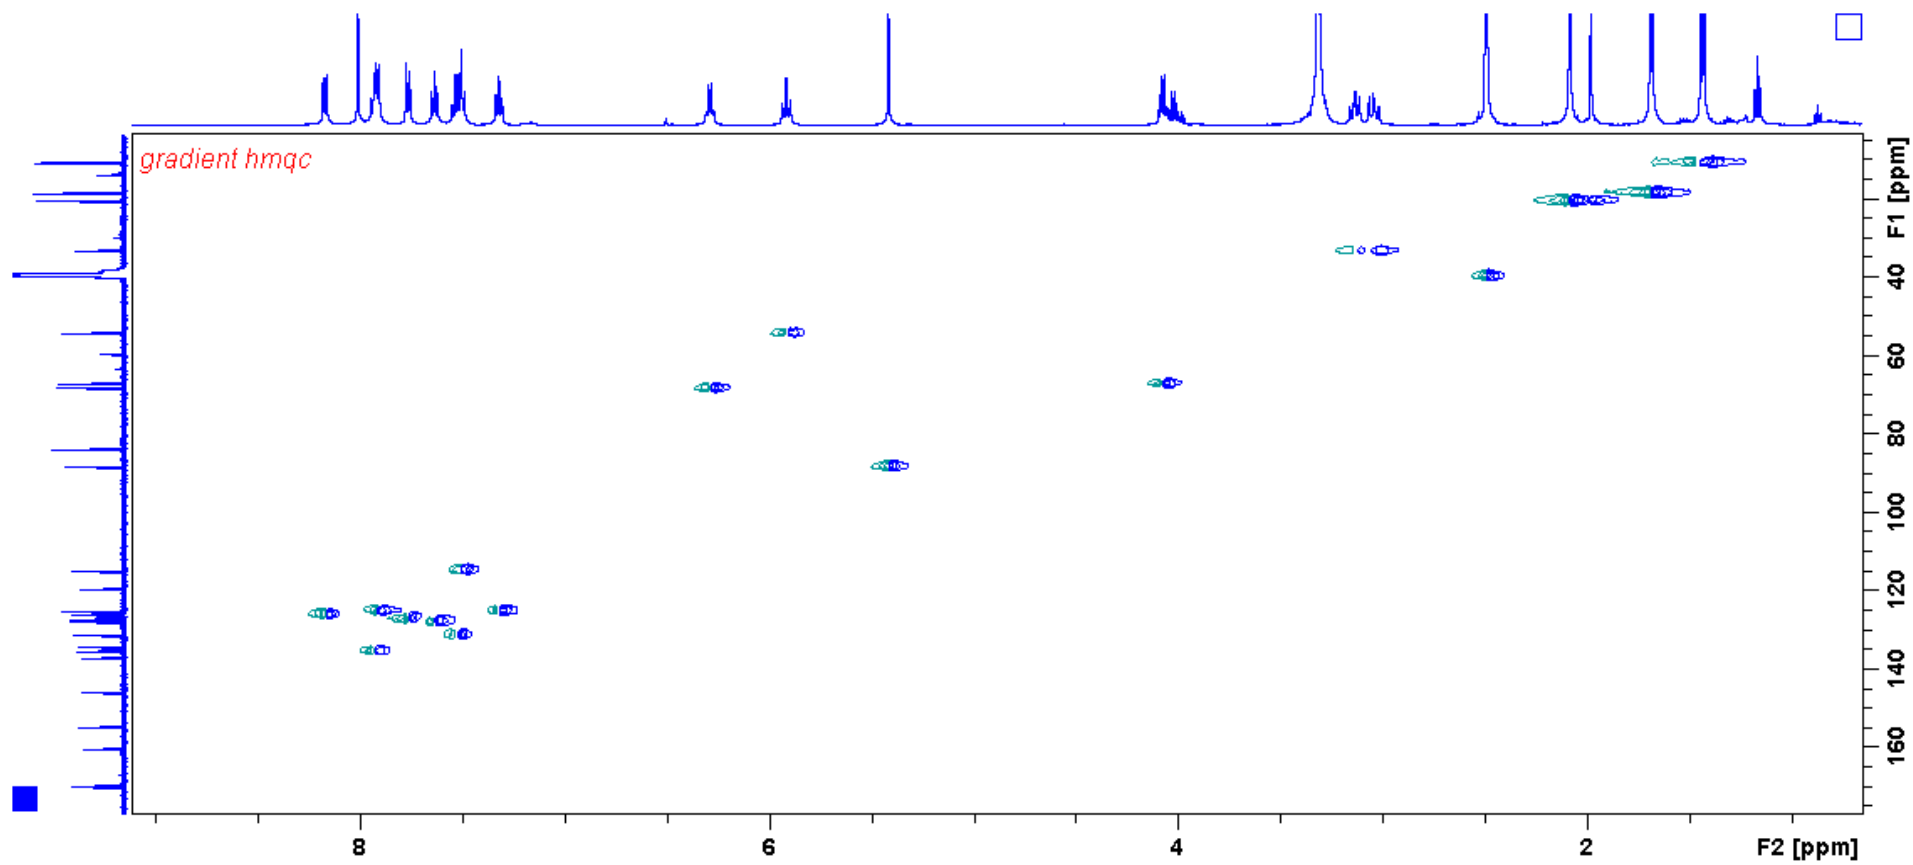

Figure S11.5  $^1\text{H}$ - $^{13}\text{C}$  HMQC NMR spectrum of **20**.

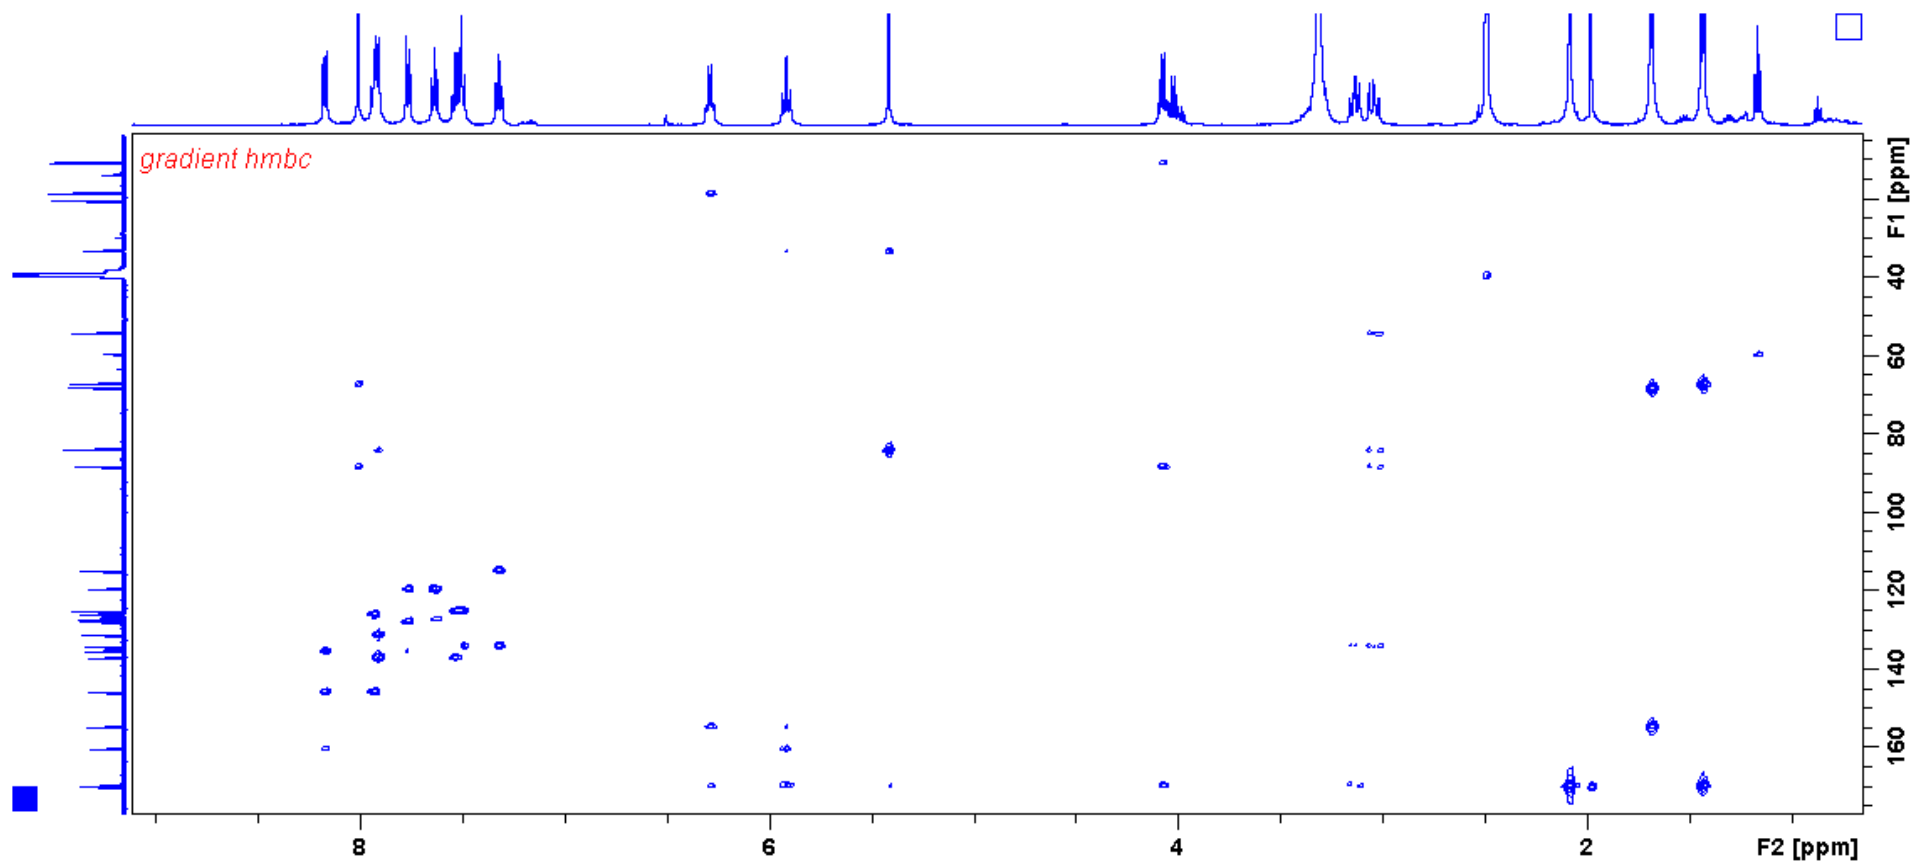

Figure S11.6  $^1\text{H}$ - $^{13}\text{C}$  HMBC NMR spectrum of **20**.



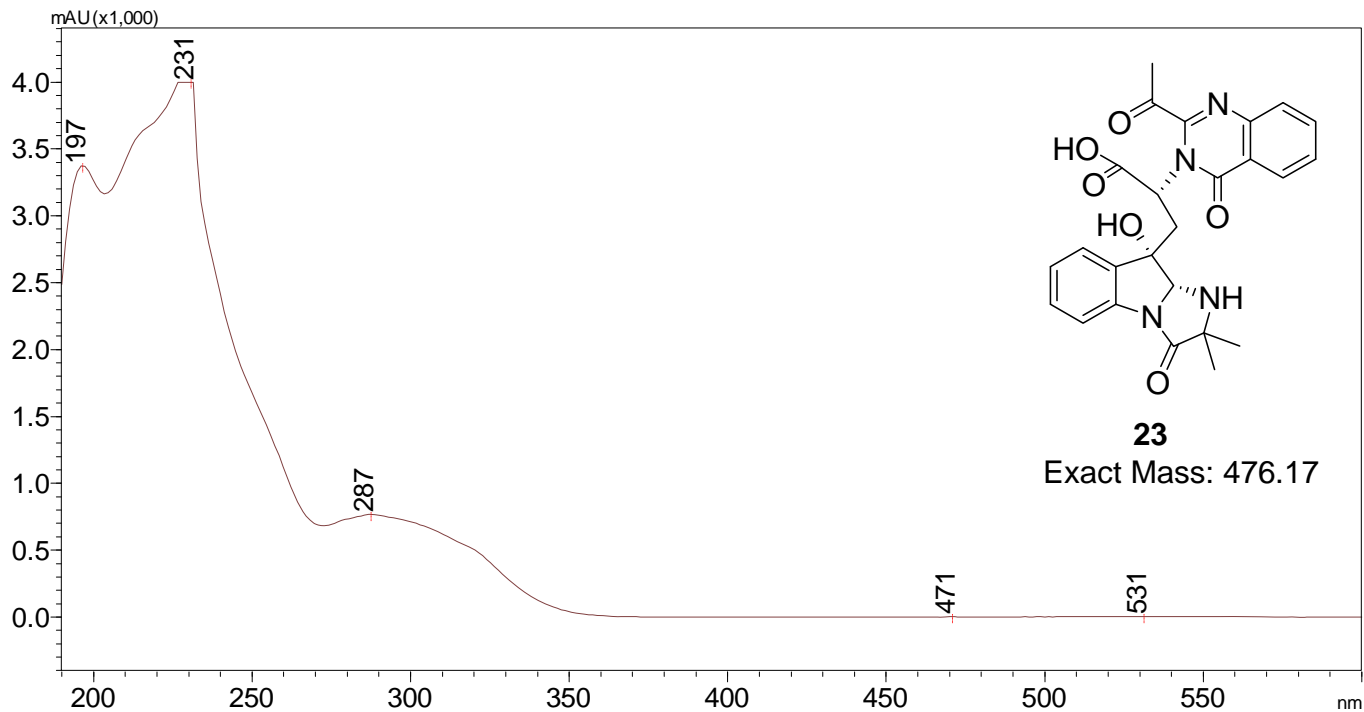

RT=22.4 min T: + c ESI MS [ 200.00-1200.00]

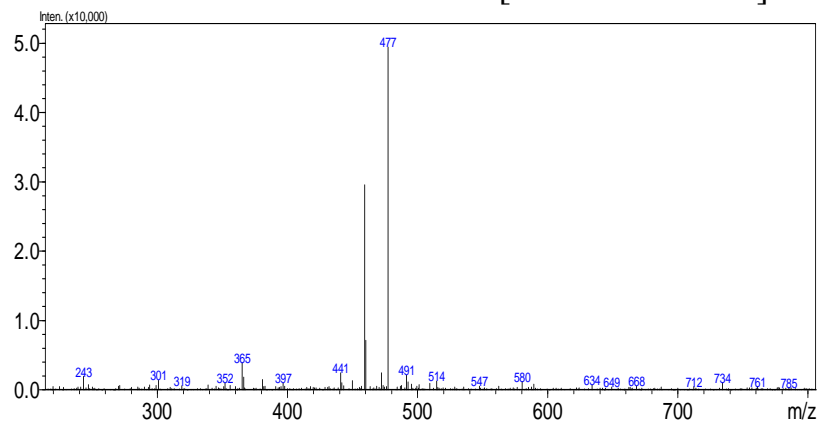

T: - c ESI MS [ 200.00-1200.00]

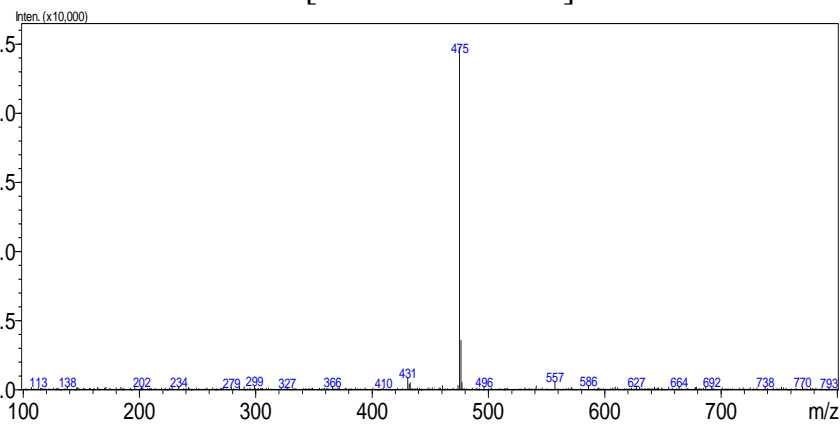

Figure S12 UV spectrum and MS Measured during LC-MS for **23**

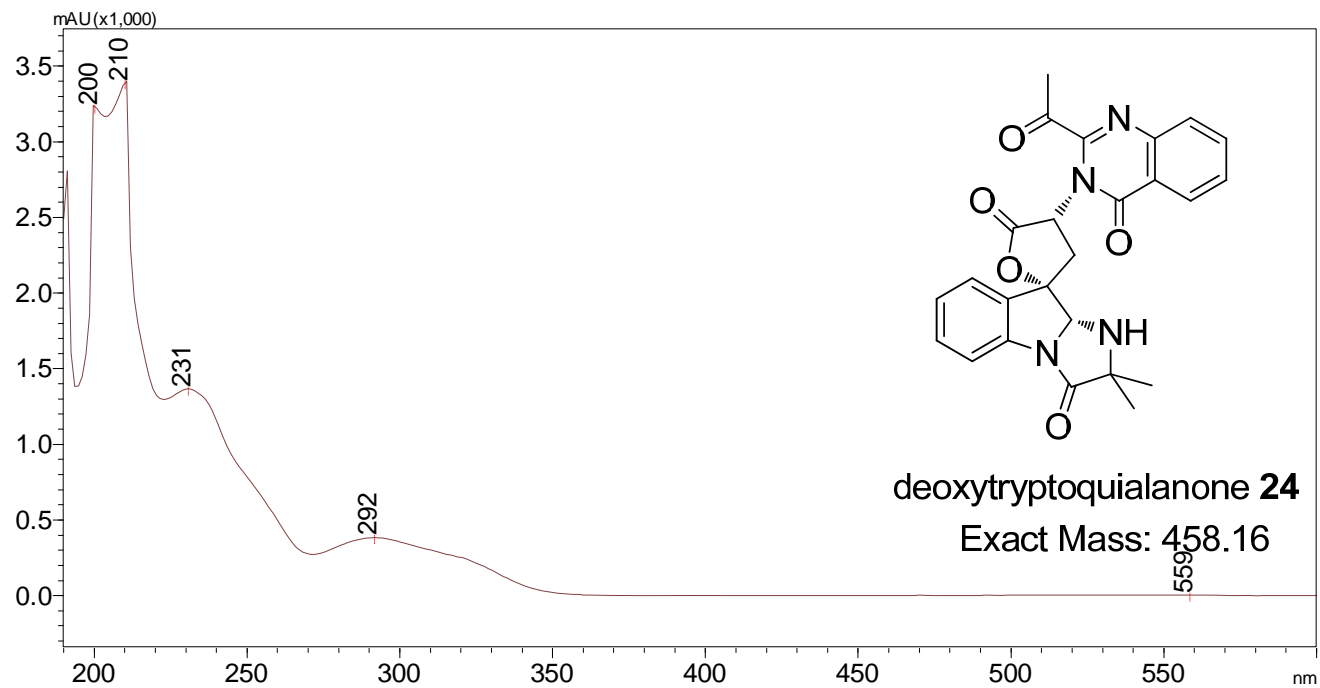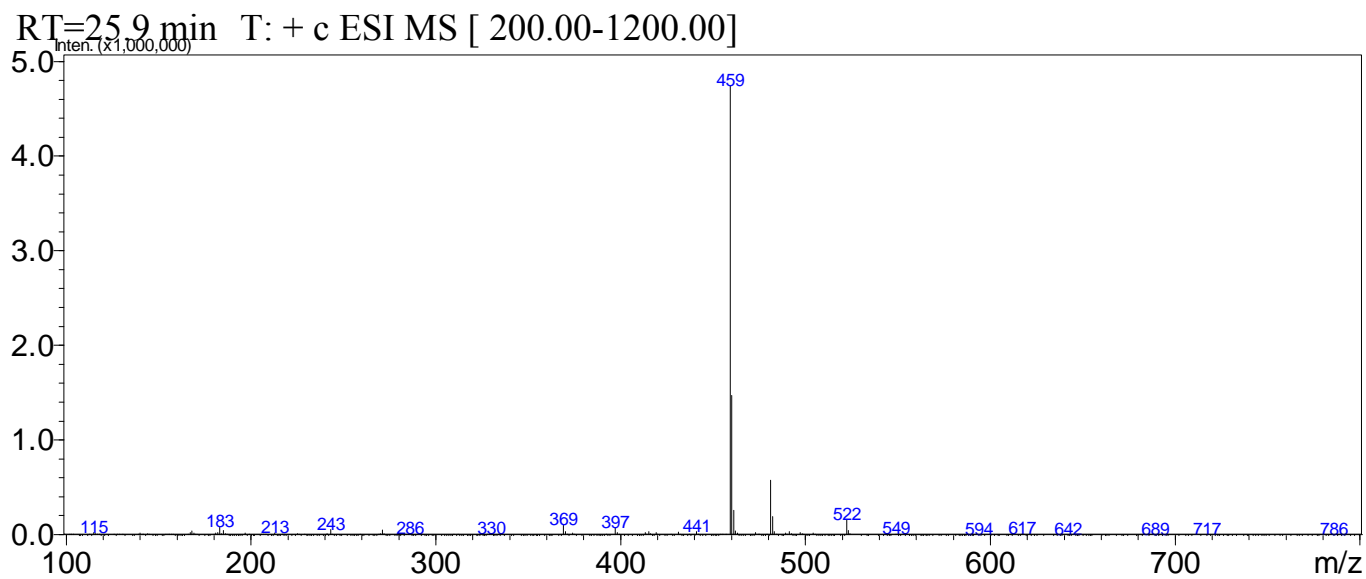

Figure S13.1 UV spectrum and MS Measured during LC-MS for **24**

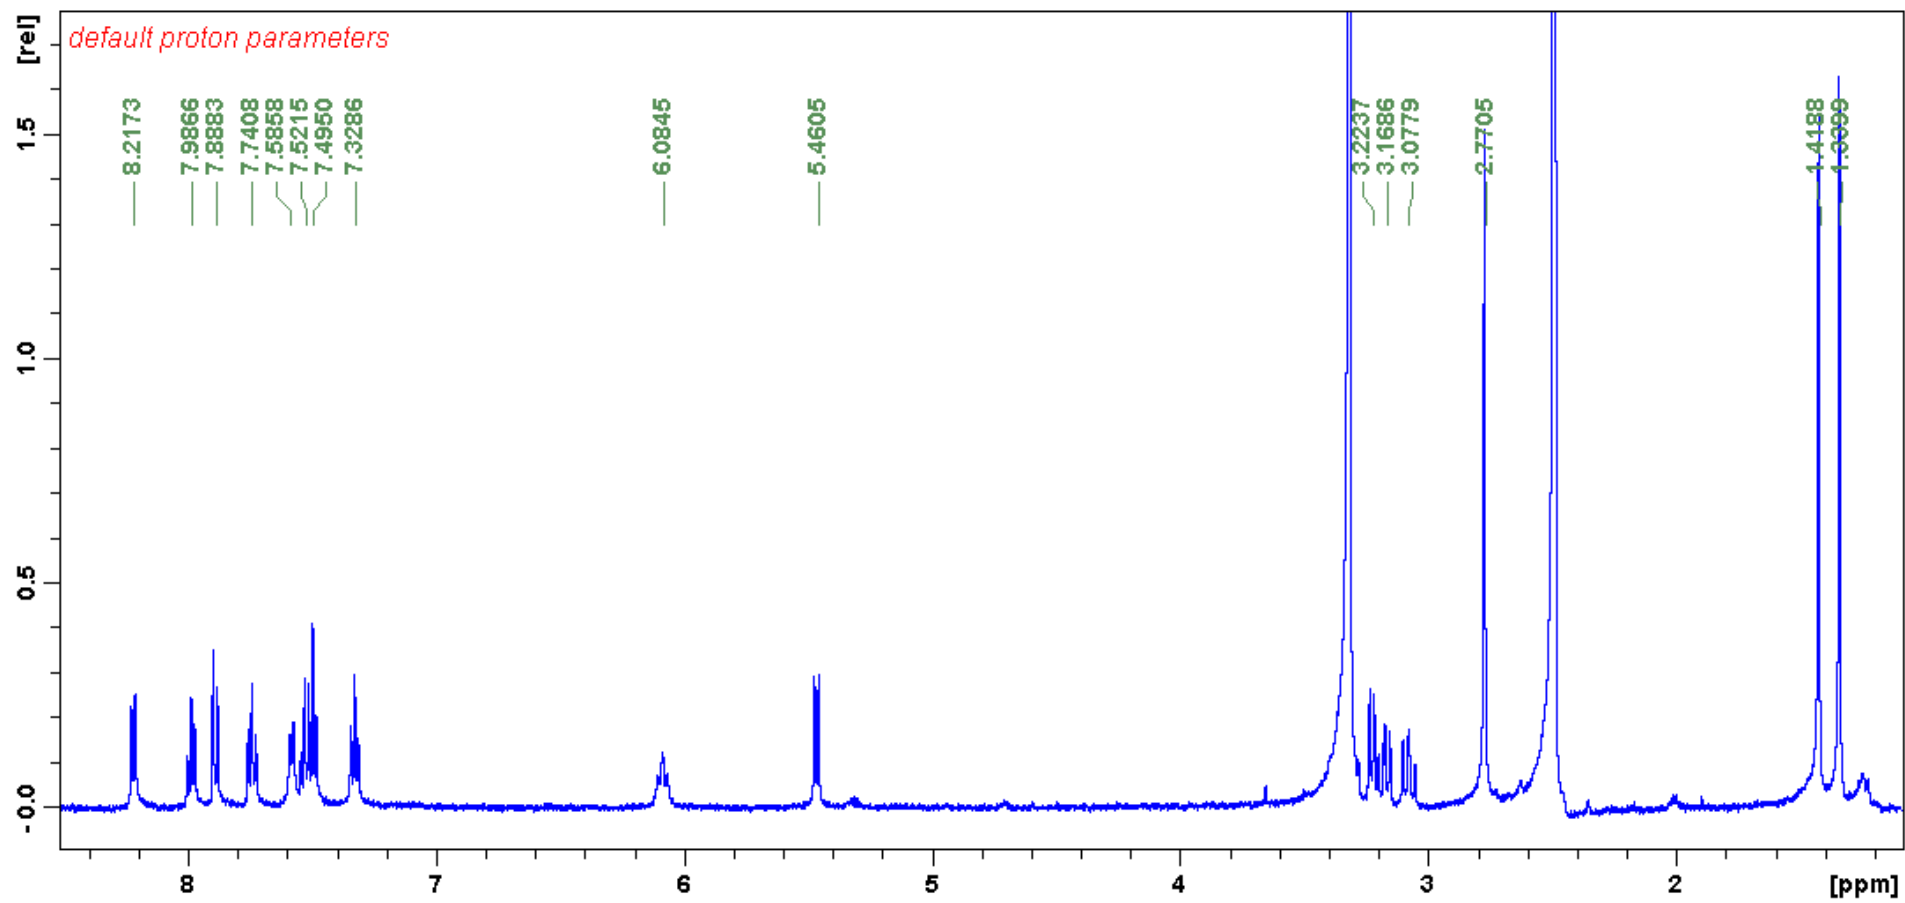

Figure S13.2  $^1\text{H}$  NMR spectrum of **24**. Measured in  $\text{DMSO-}d_6$  at 500MHz

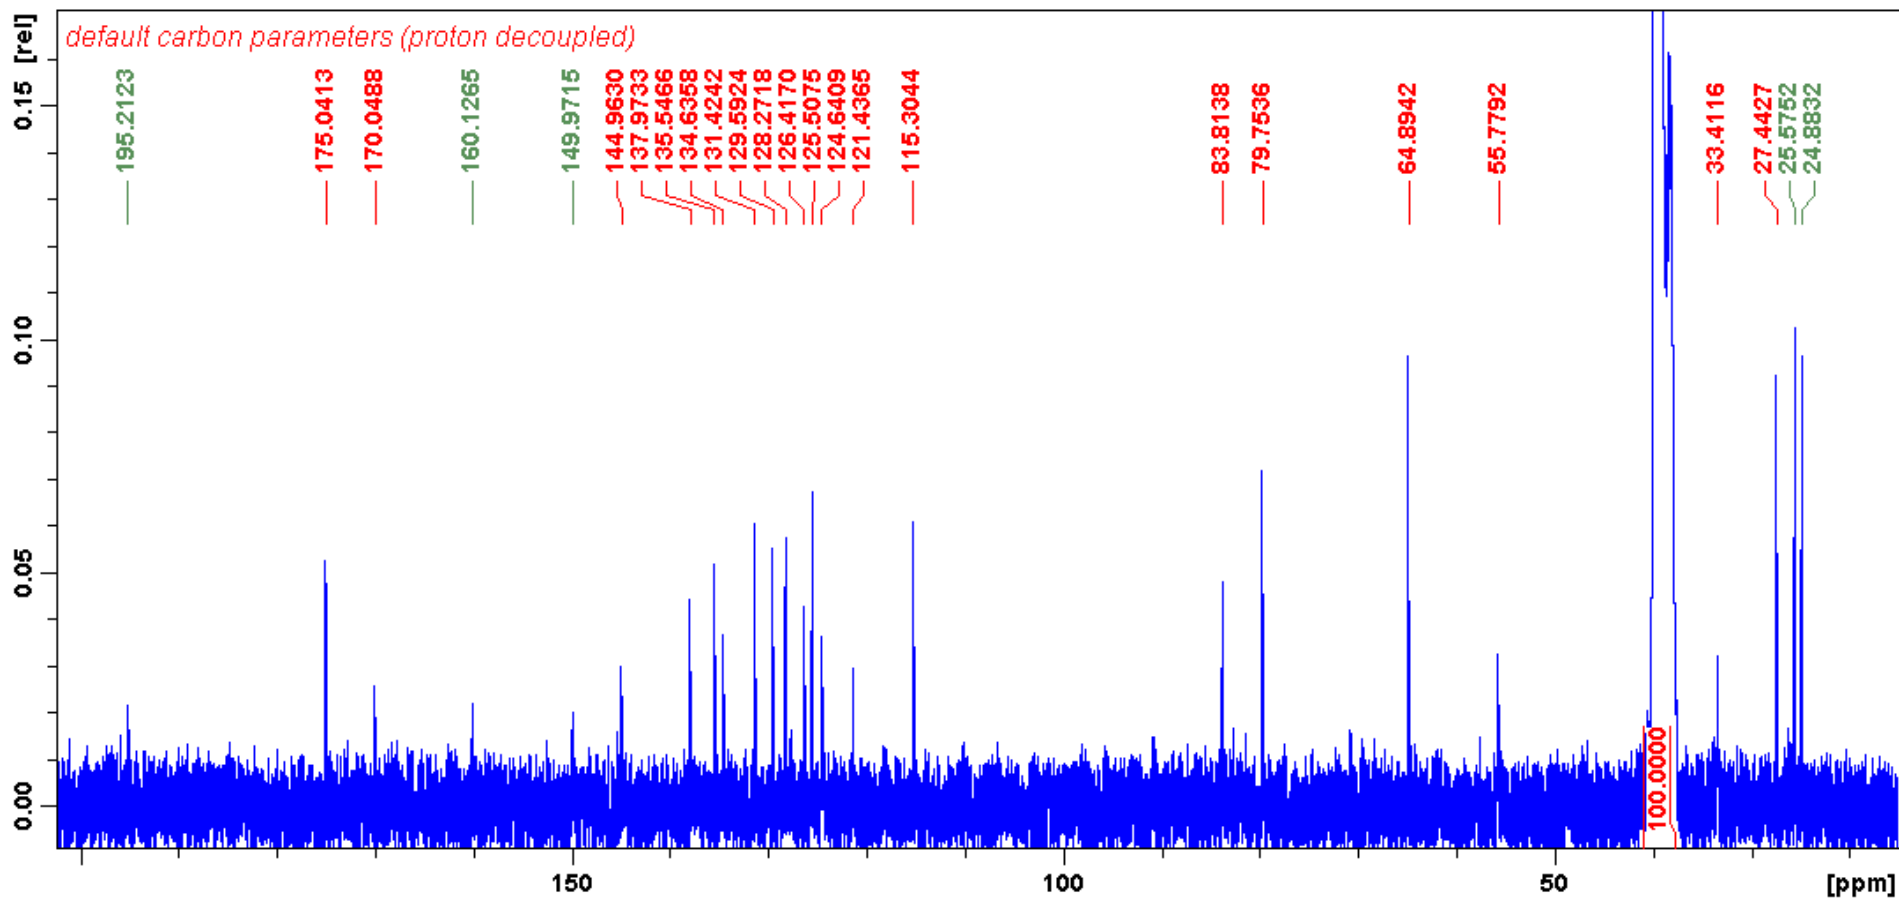

Figure S13.3  $^{13}\text{C}$  NMR spectrum of **24**. Measured in  $\text{DMSO-}d_6$  at 125MHz

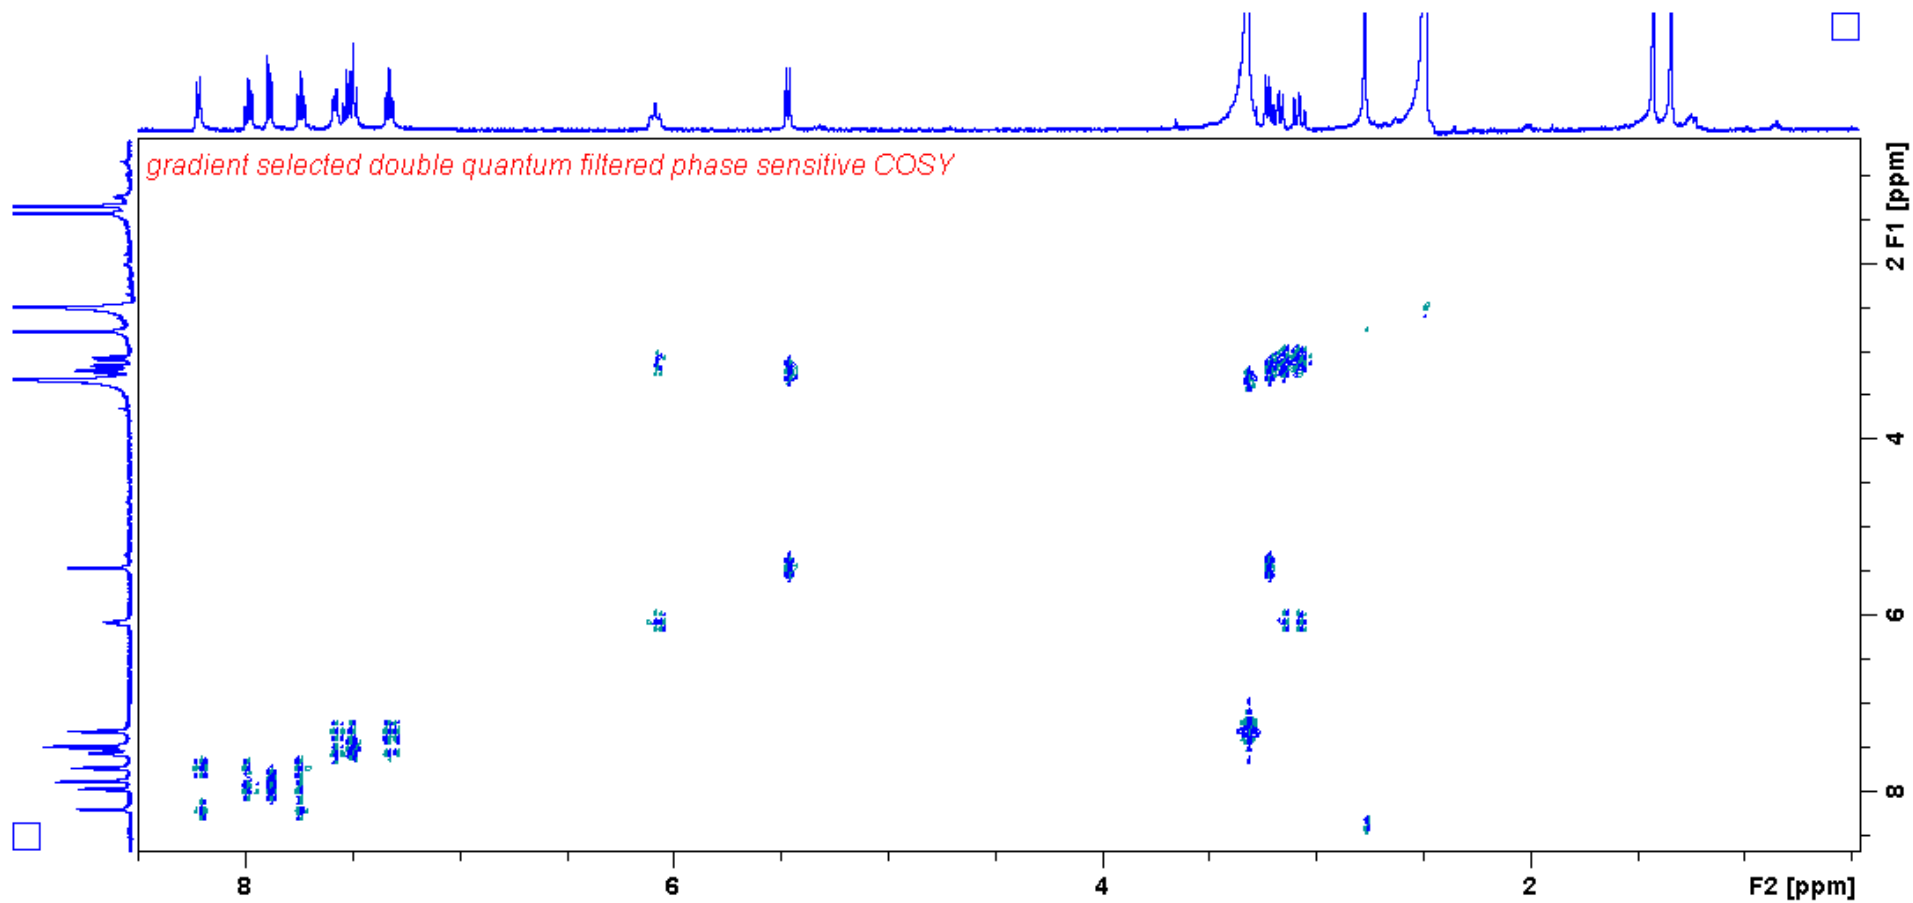

Figure S13.4  $^1\text{H}$ - $^1\text{H}$  COSY NMR spectrum of **24**.

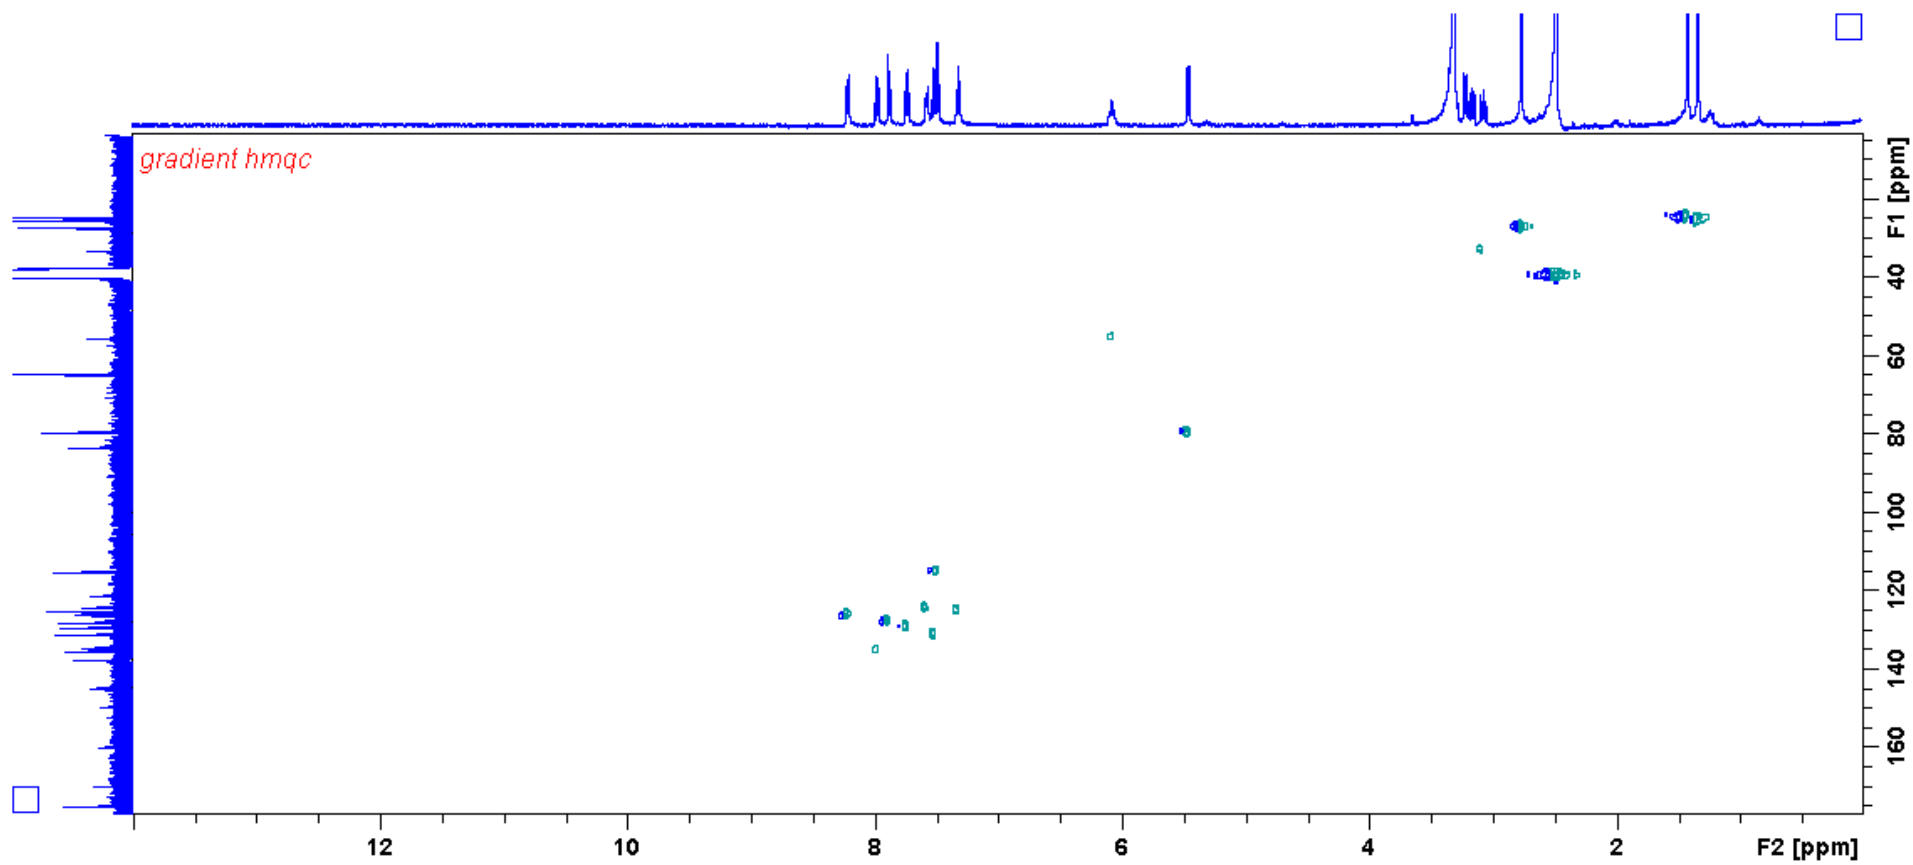

Figure S13.5  $^1\text{H}$ - $^{13}\text{C}$  HMQC NMR spectrum of **24**.

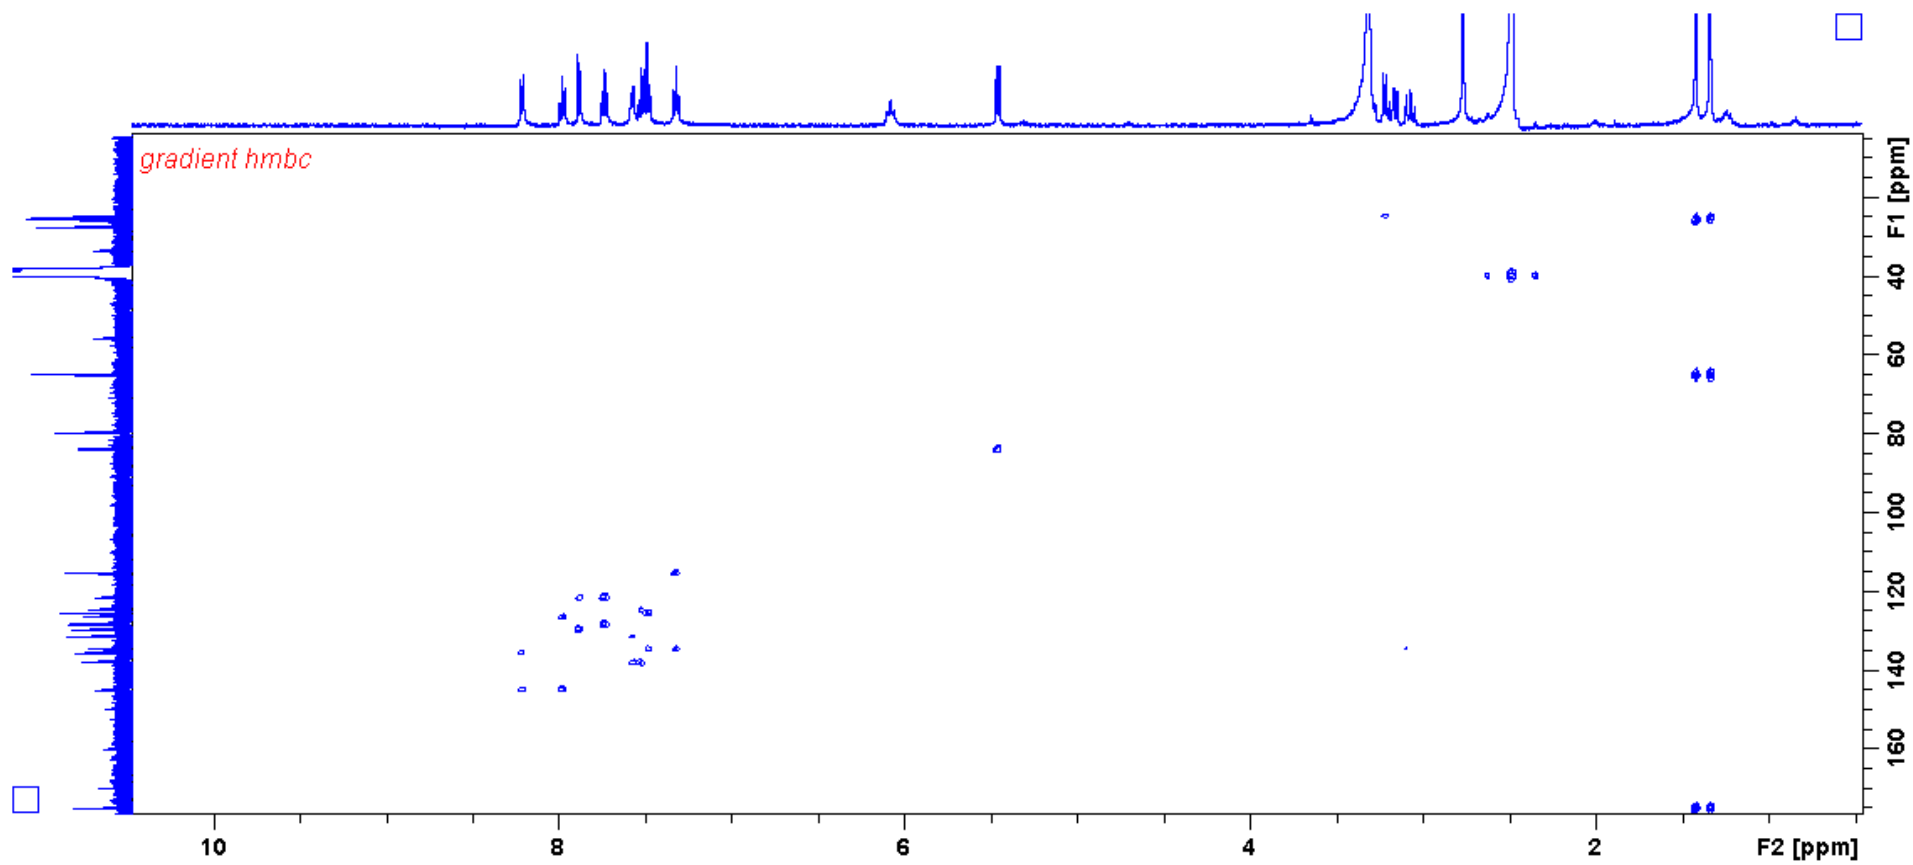

Figure S13.6  $^1\text{H}$ - $^{13}\text{C}$  HMBC NMR spectrum of **24**.

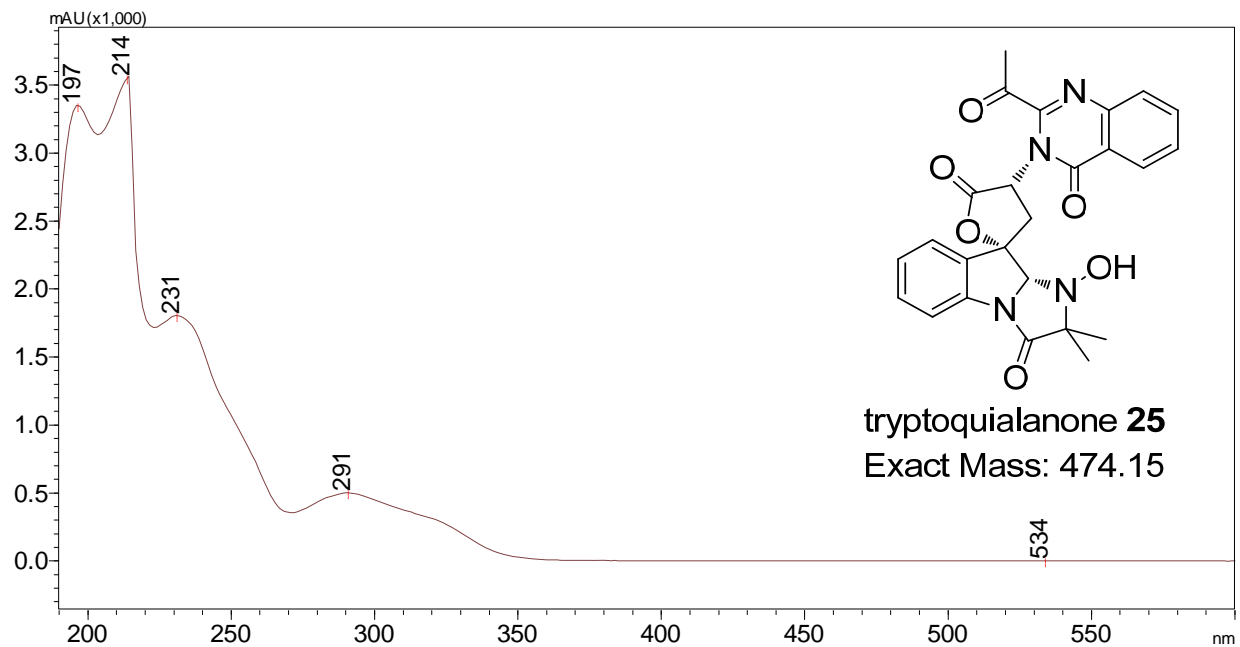

RT=28.2 min T: + c ESI MS [ 200.00-1200.00]

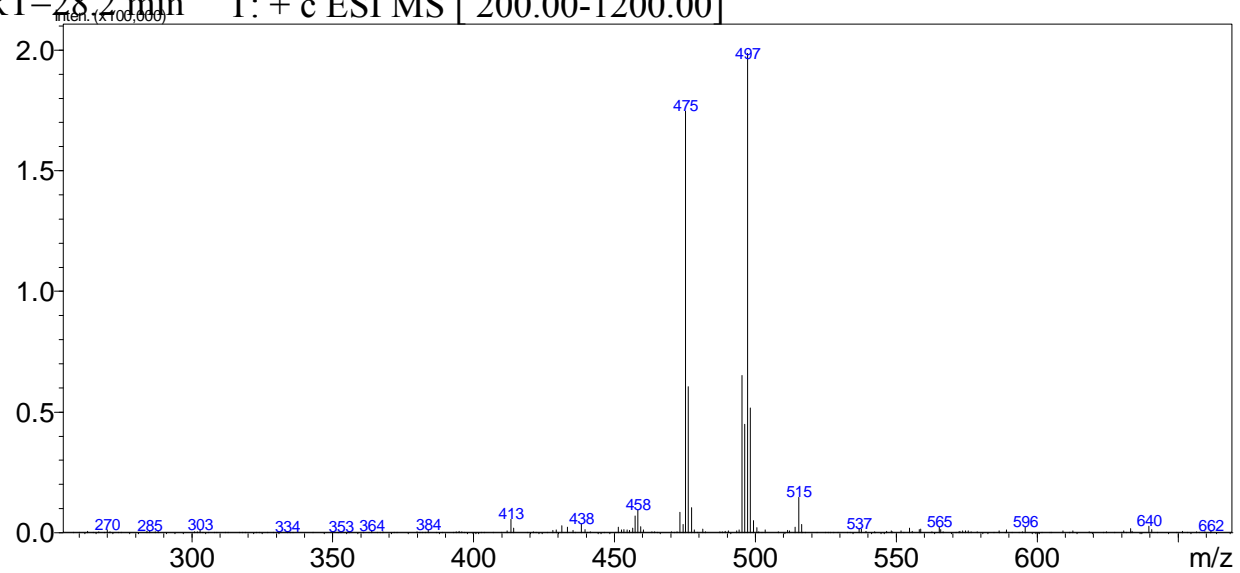

Figure S14.1 UV spectrum and MS Measured during LC-MS for **25**



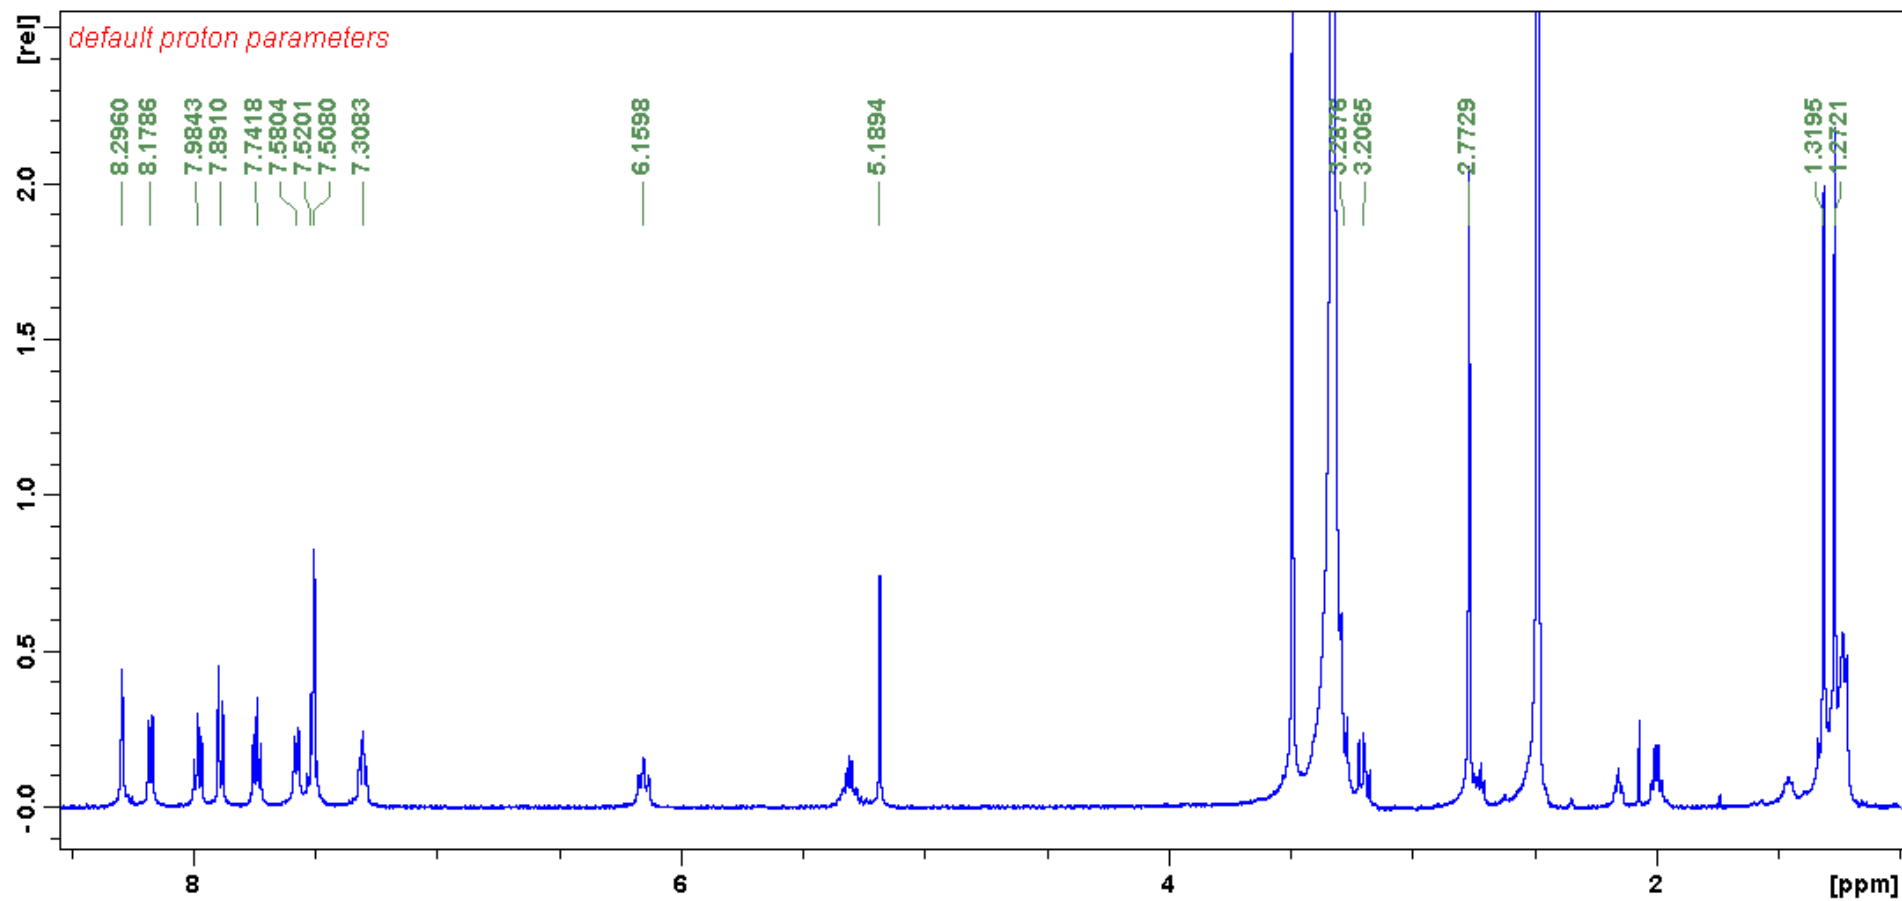

Figure S14.2  $^1\text{H}$  NMR spectrum of **25**. Measured in  $\text{DMSO-}d_6$  at 500MHz

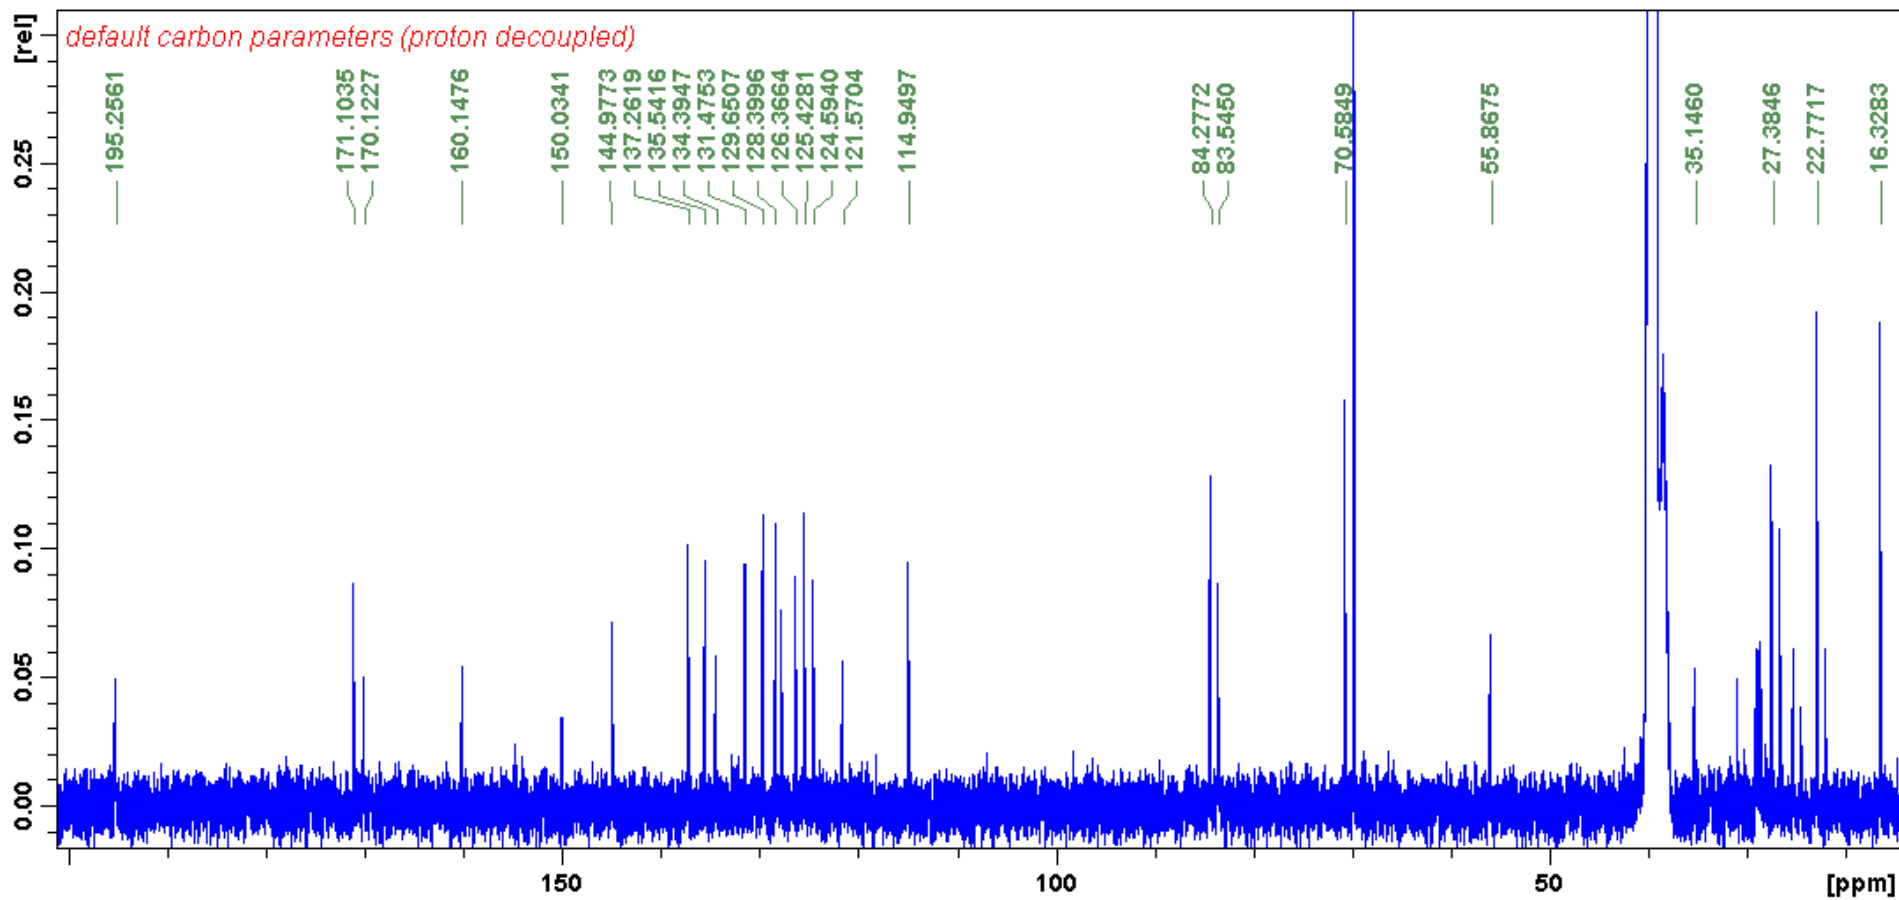

Figure S14.3  $^{13}\text{C}$  NMR spectrum of **25**. Measured in  $\text{DMSO-}d_6$  at 125MHz

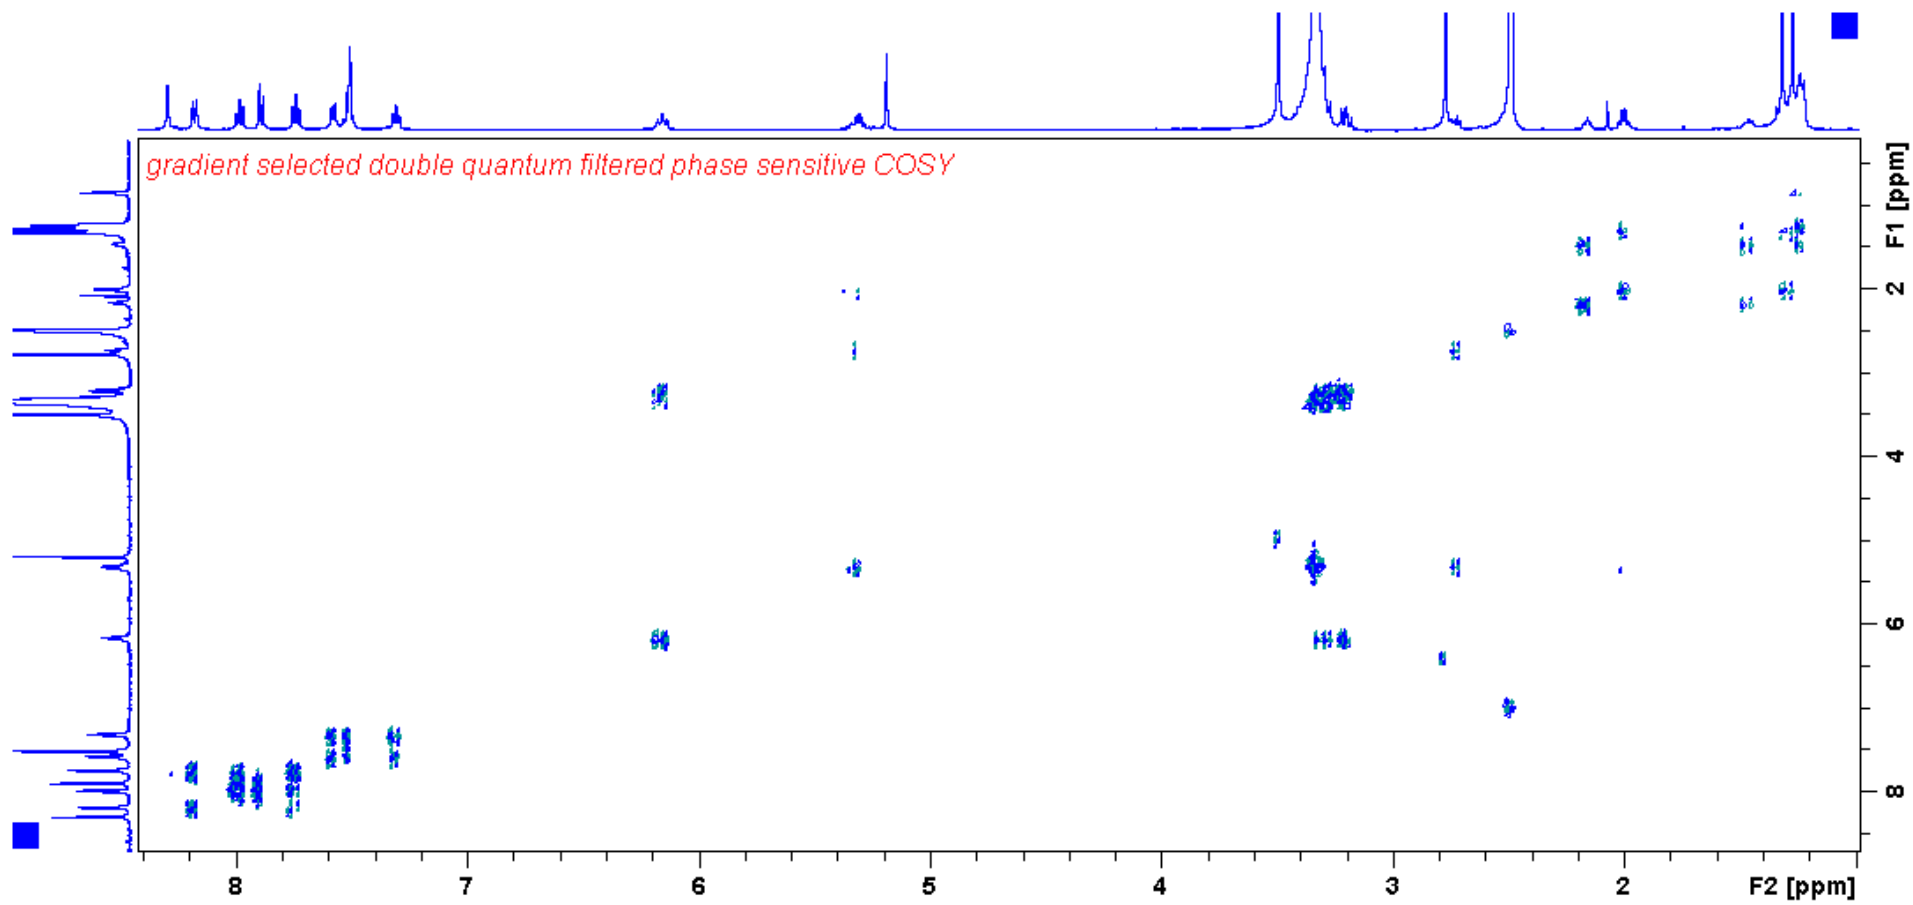

Figure S14.4  $^1\text{H}$ - $^1\text{H}$  COSY NMR spectrum of **25**

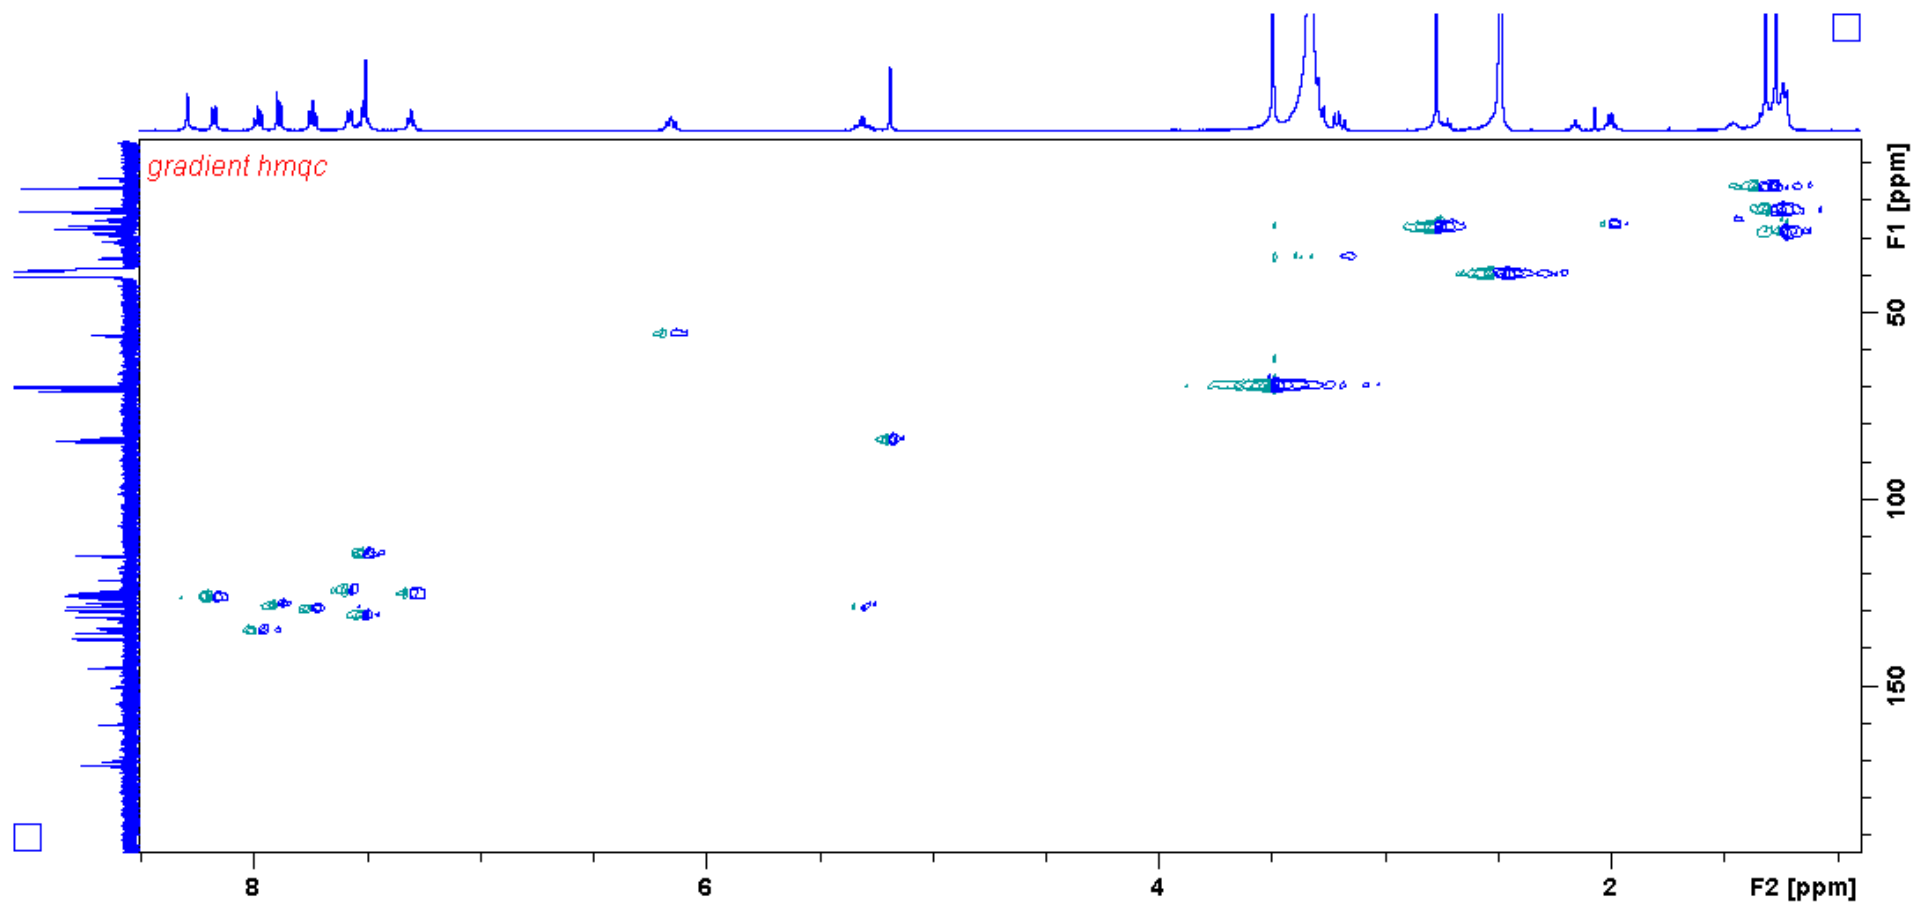

Figure S14.5  $^1\text{H}$ - $^{13}\text{C}$  HMQC NMR spectrum of **25**.

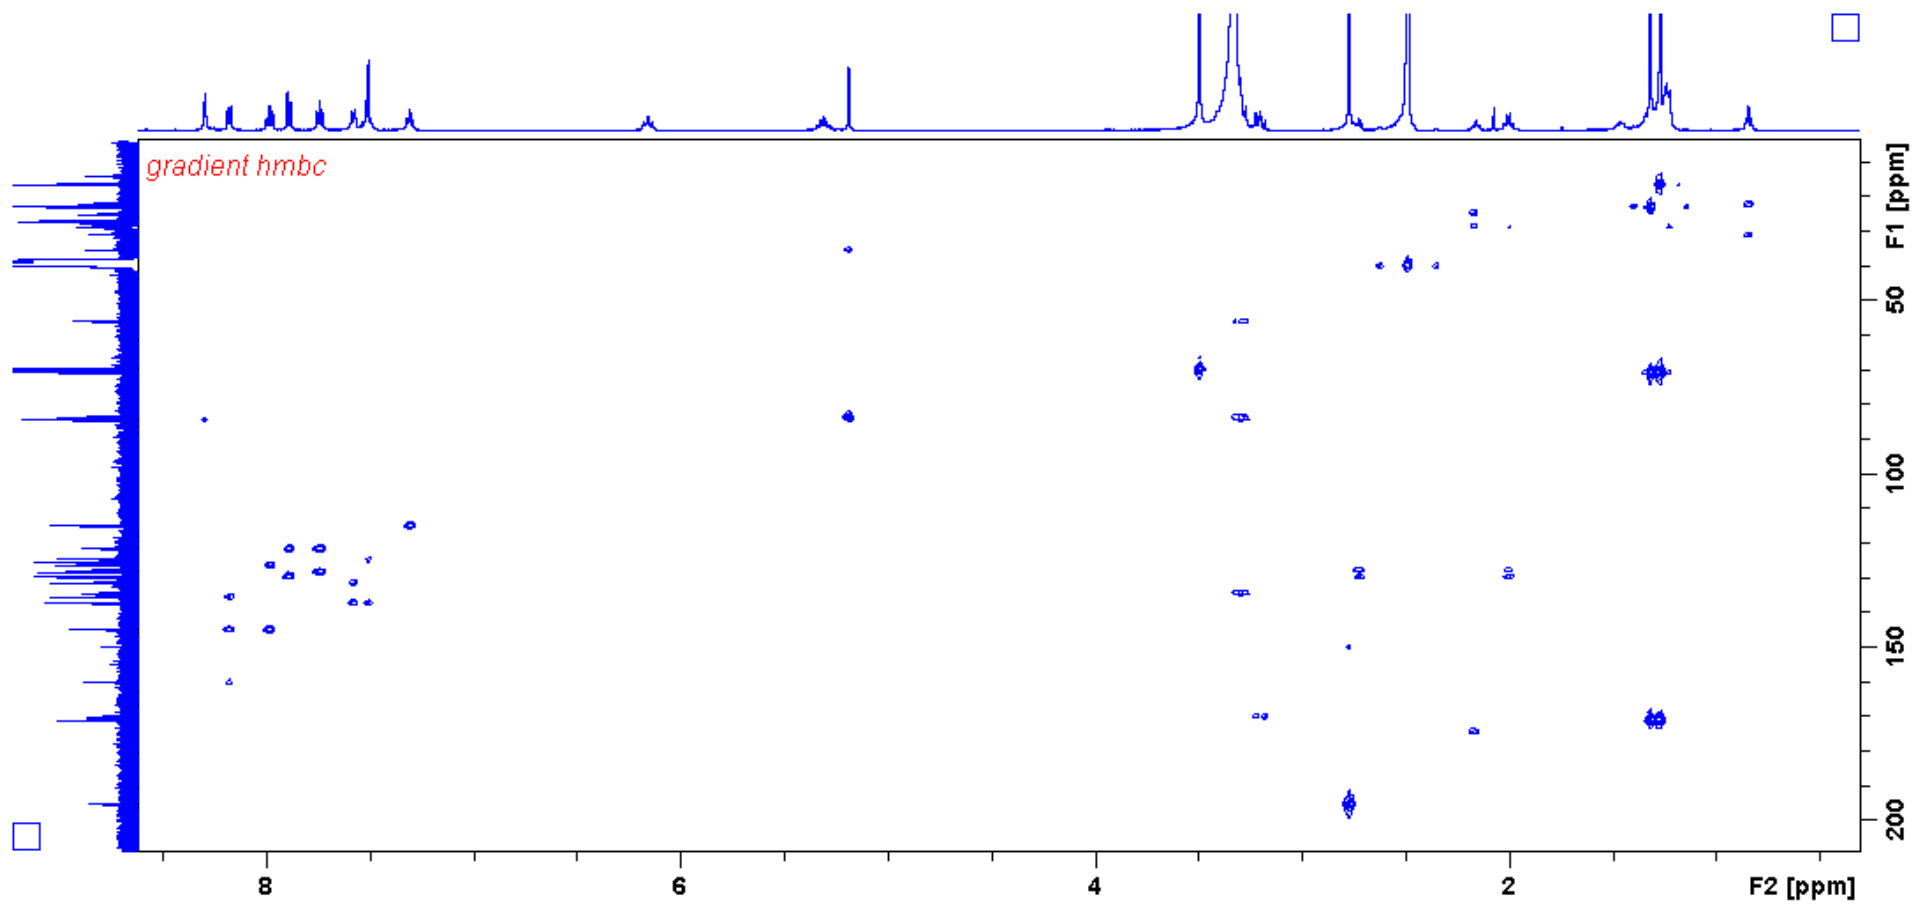

Figure S14.6  $^1\text{H}$ - $^{13}\text{C}$  HMBC NMR spectrum of **25**.

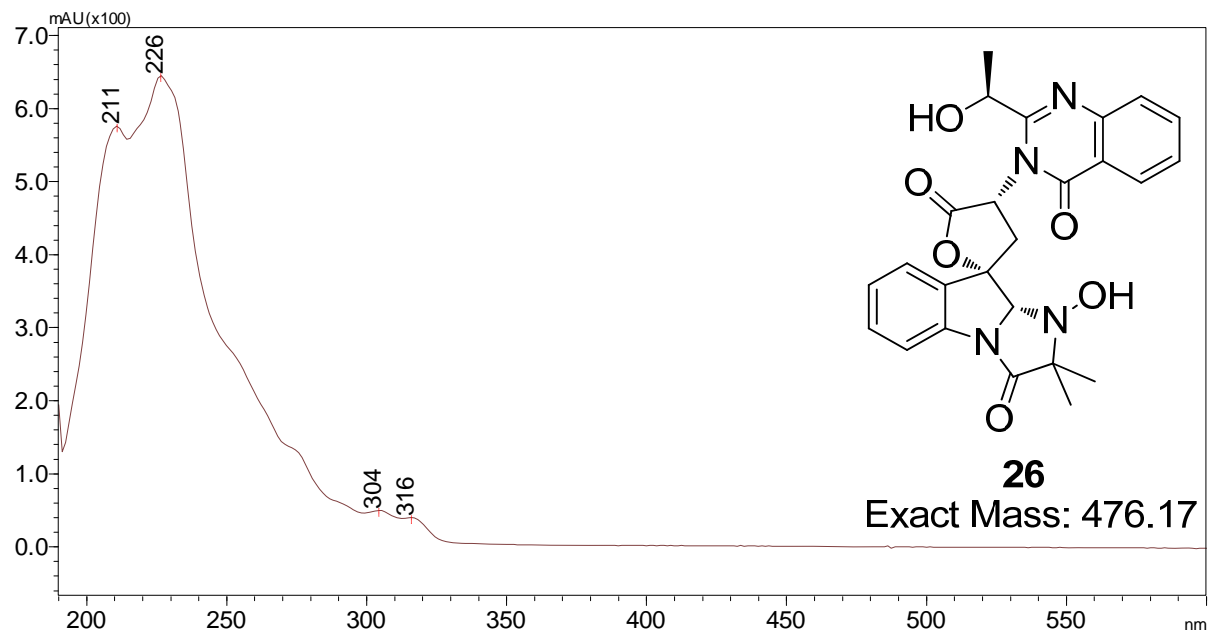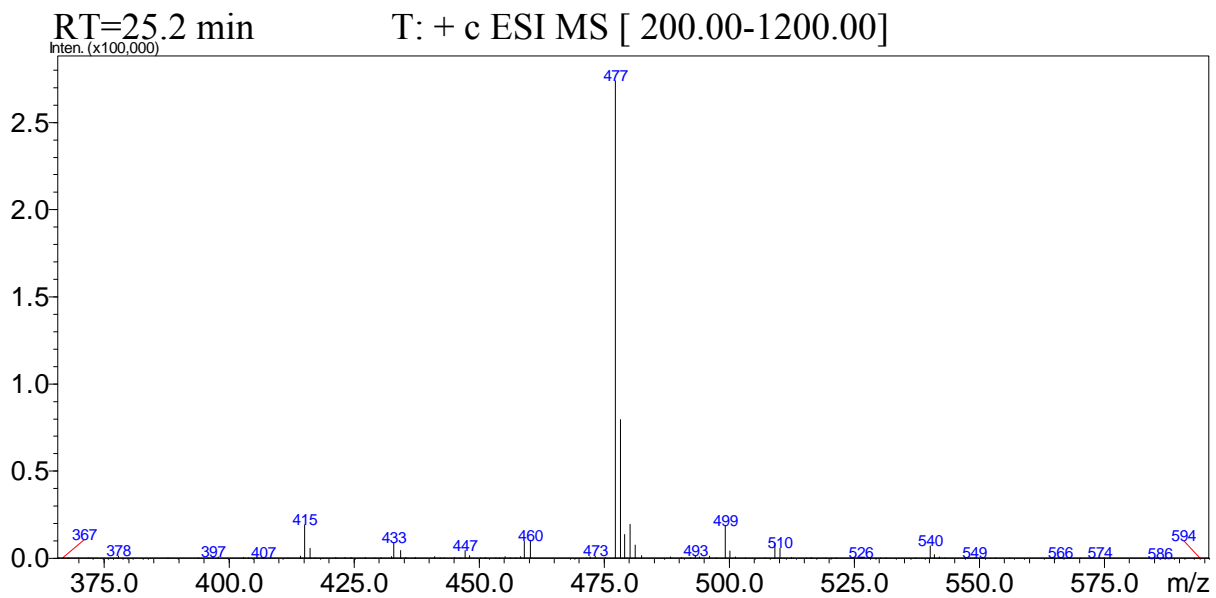

Figure S15 UV spectrum and MS Measured during LC-MS for **26**

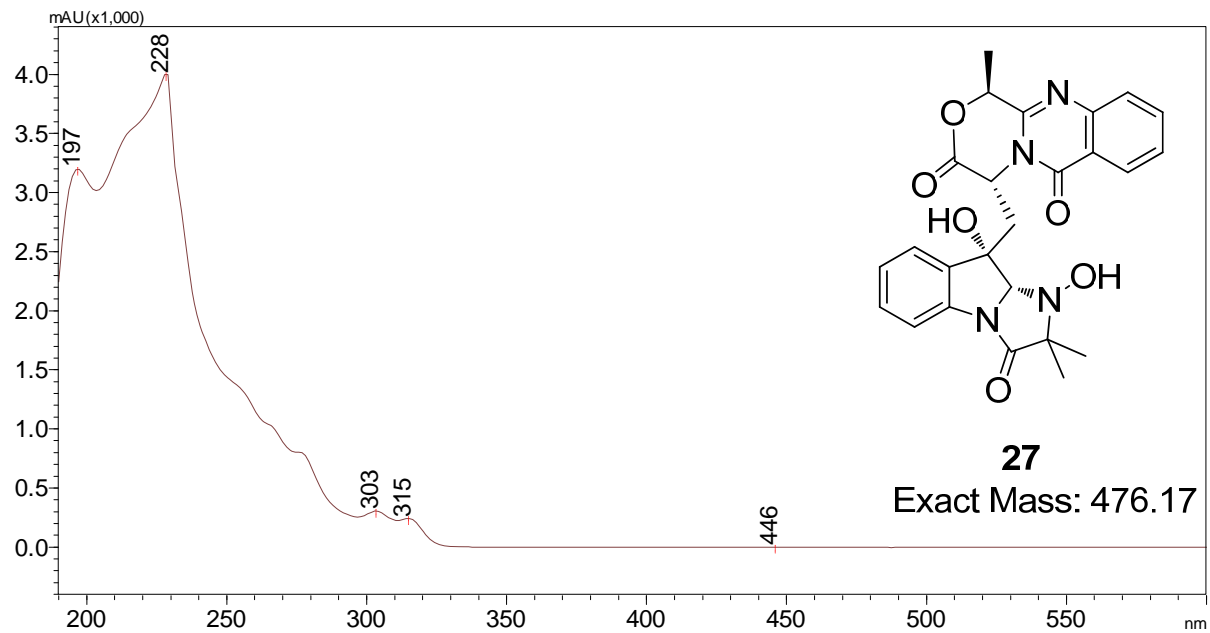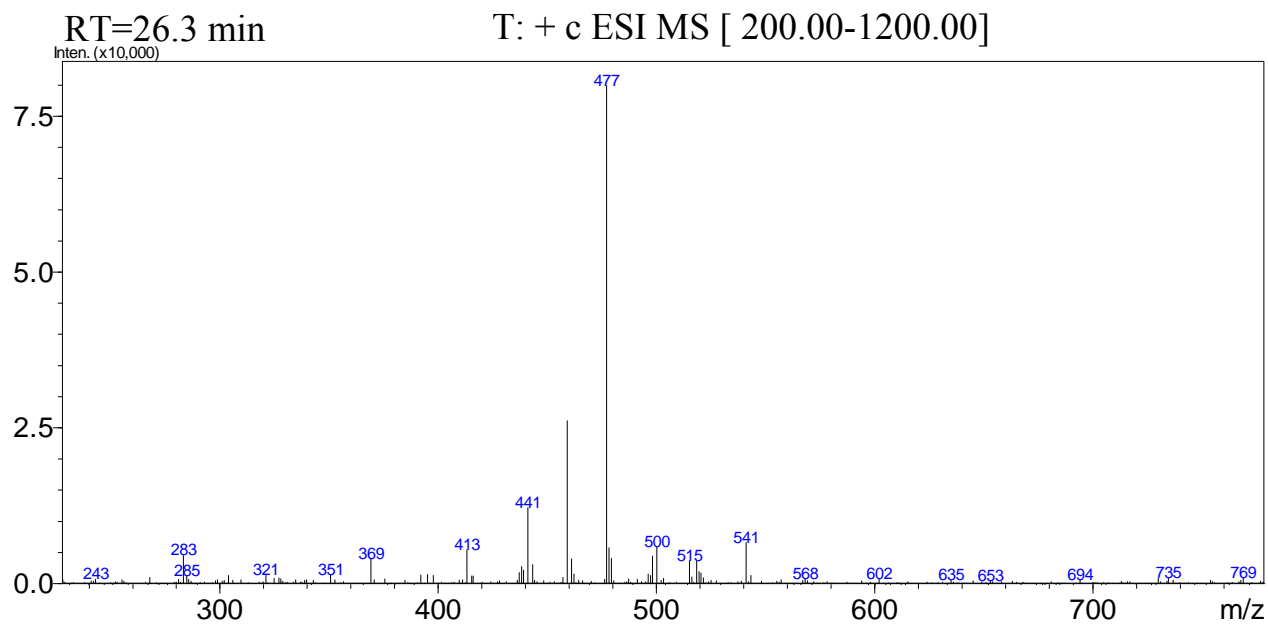

Figure S16 UV spectrum and MS Measured during LC-MS for **27**

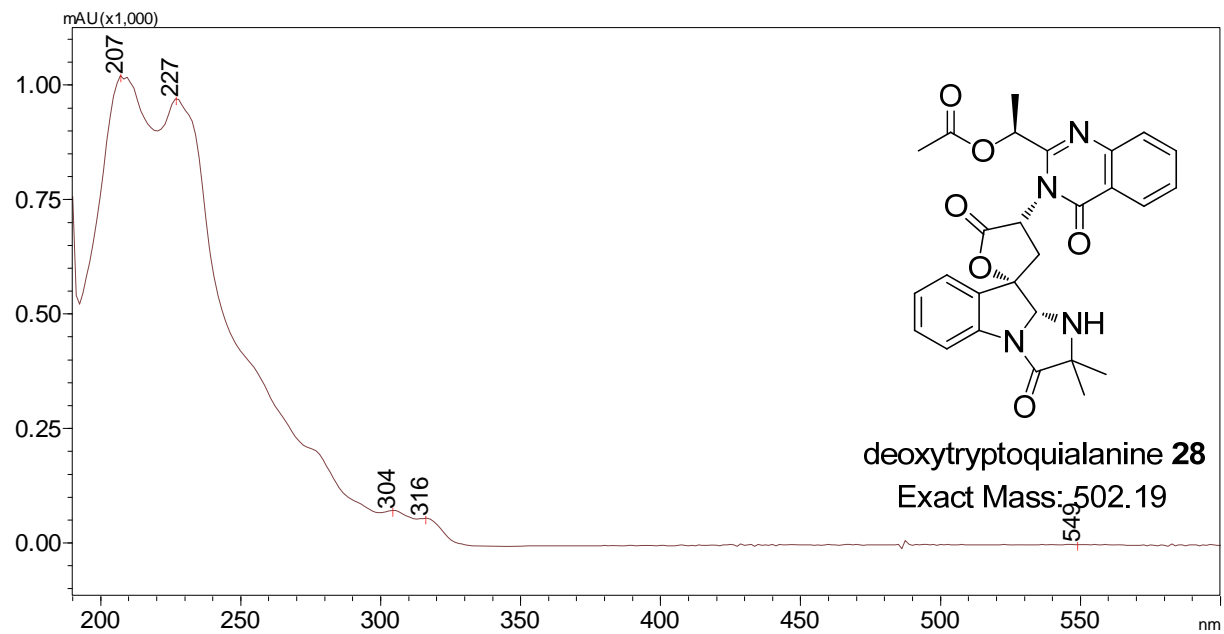

RT=24.7 min

T: + c ESI MS [ 200.00-1200.00]

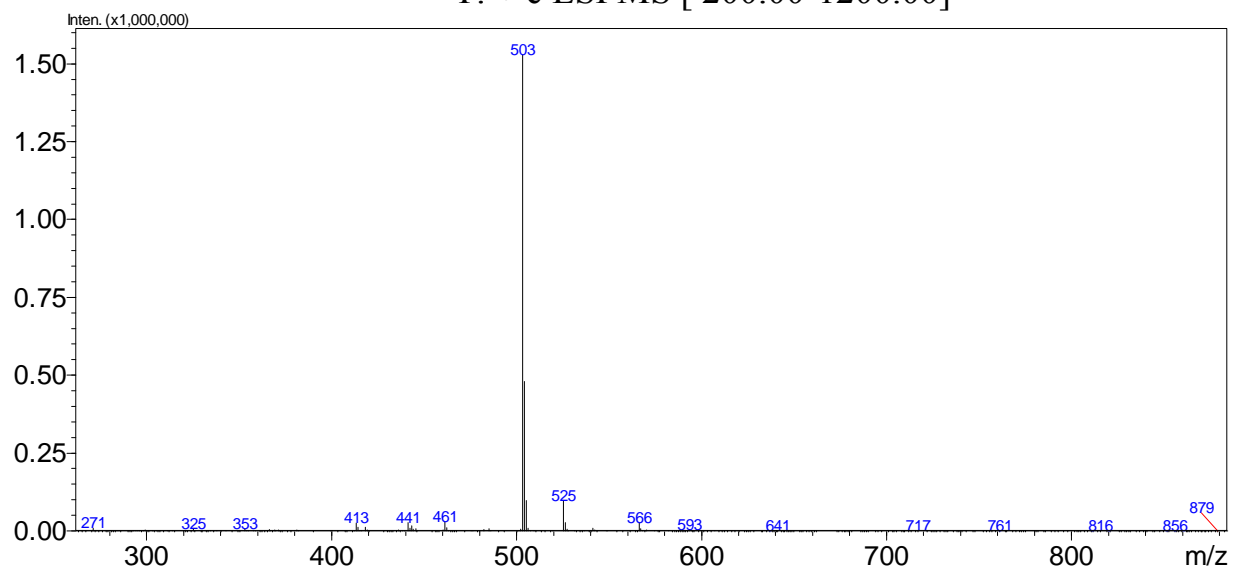

Figure S17.1 UV spectrum and MS Measured during LC-MS for **28**



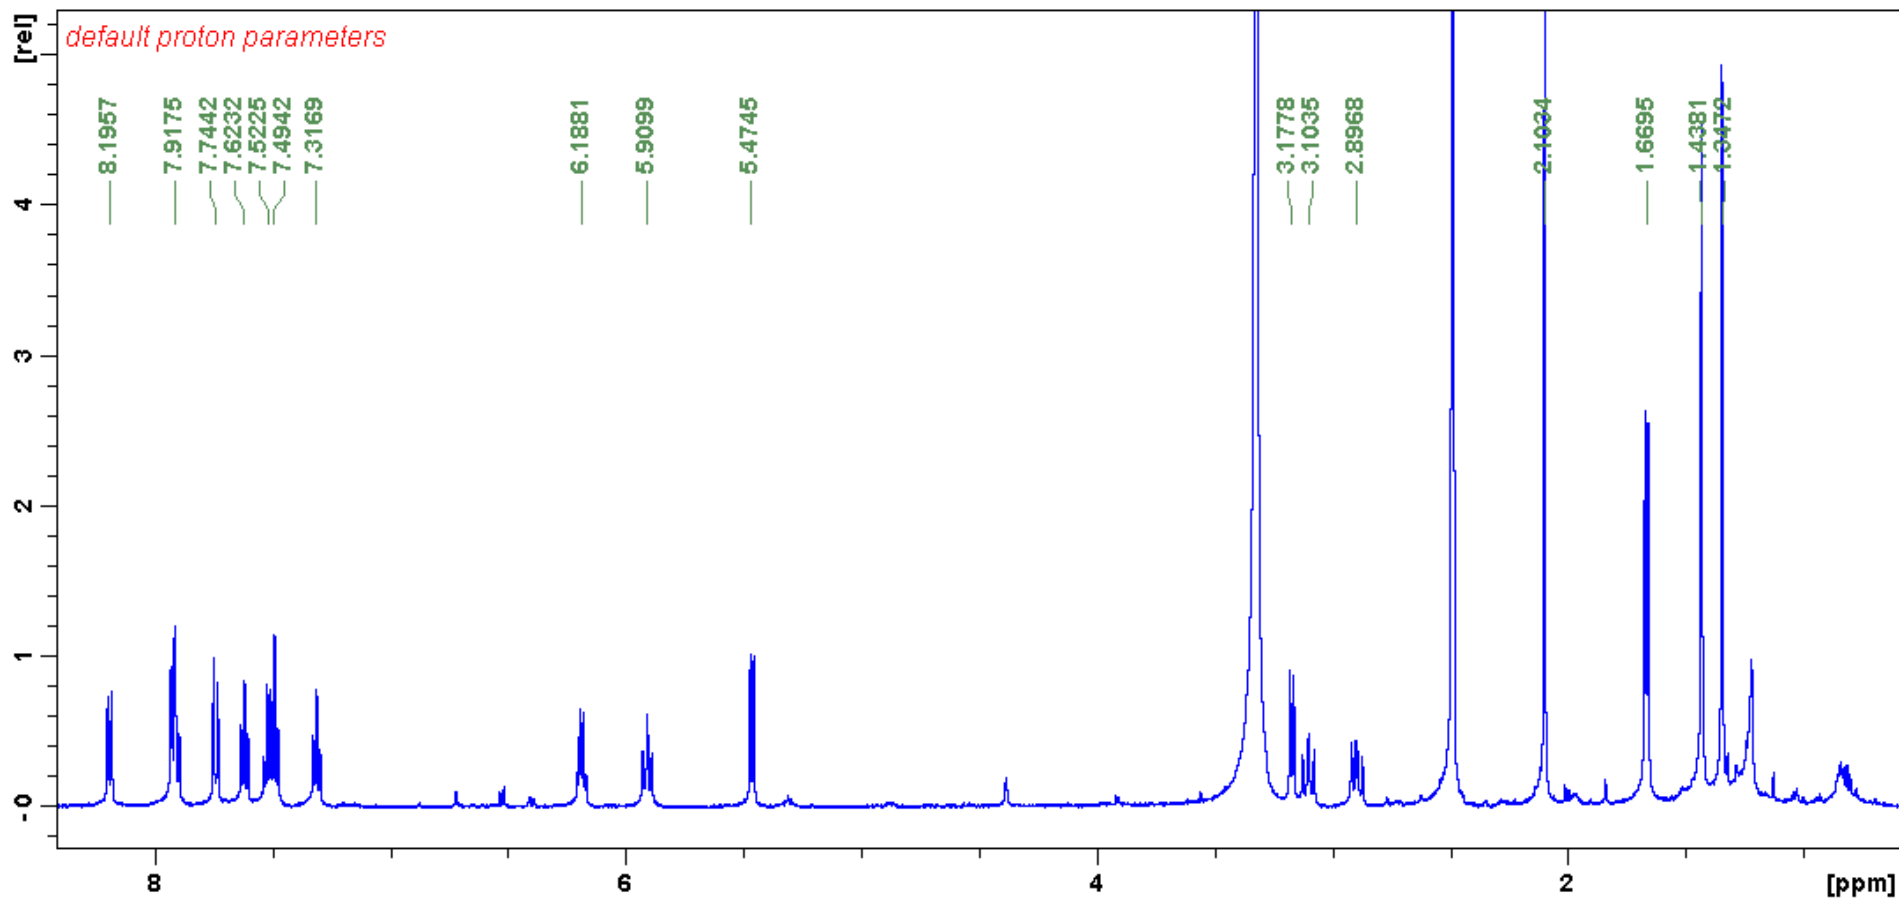

Figure S17.2  $^1\text{H}$  NMR spectrum of **28**. Measured in  $\text{DMSO-}d_6$  at 500MHz

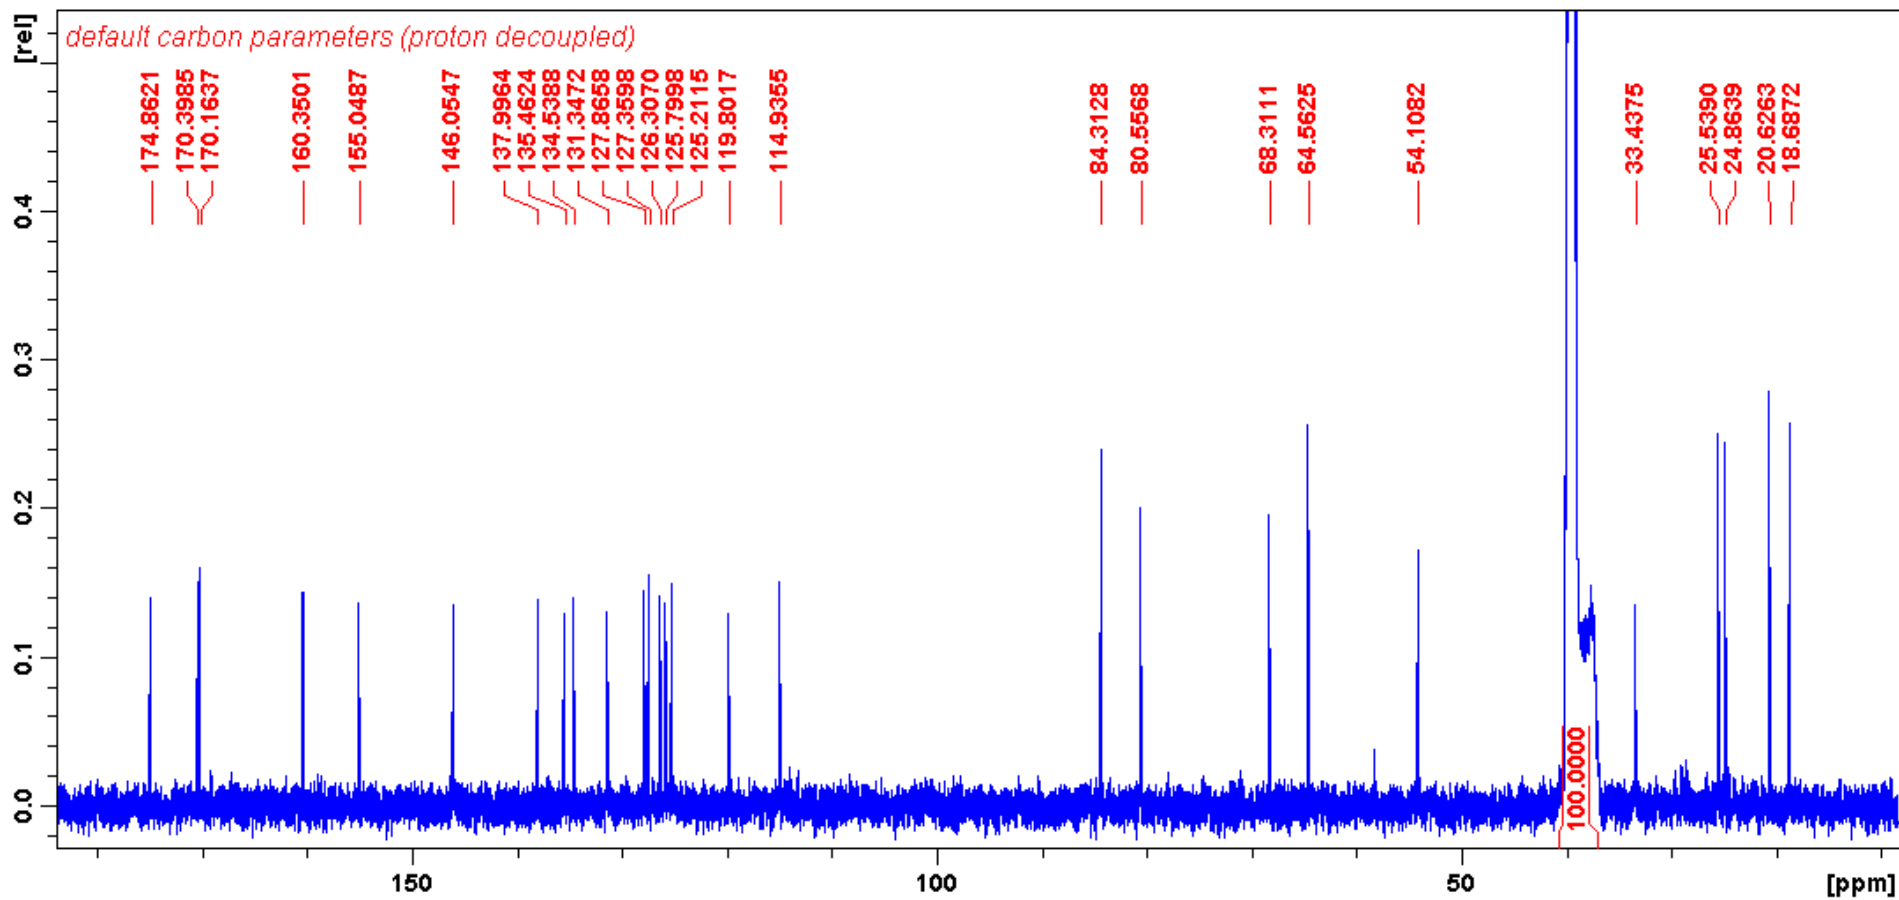

Figure S17.3  $^{13}\text{C}$  NMR spectrum of **28**. Measured in  $\text{DMSO-}d_6$  at 125MHz

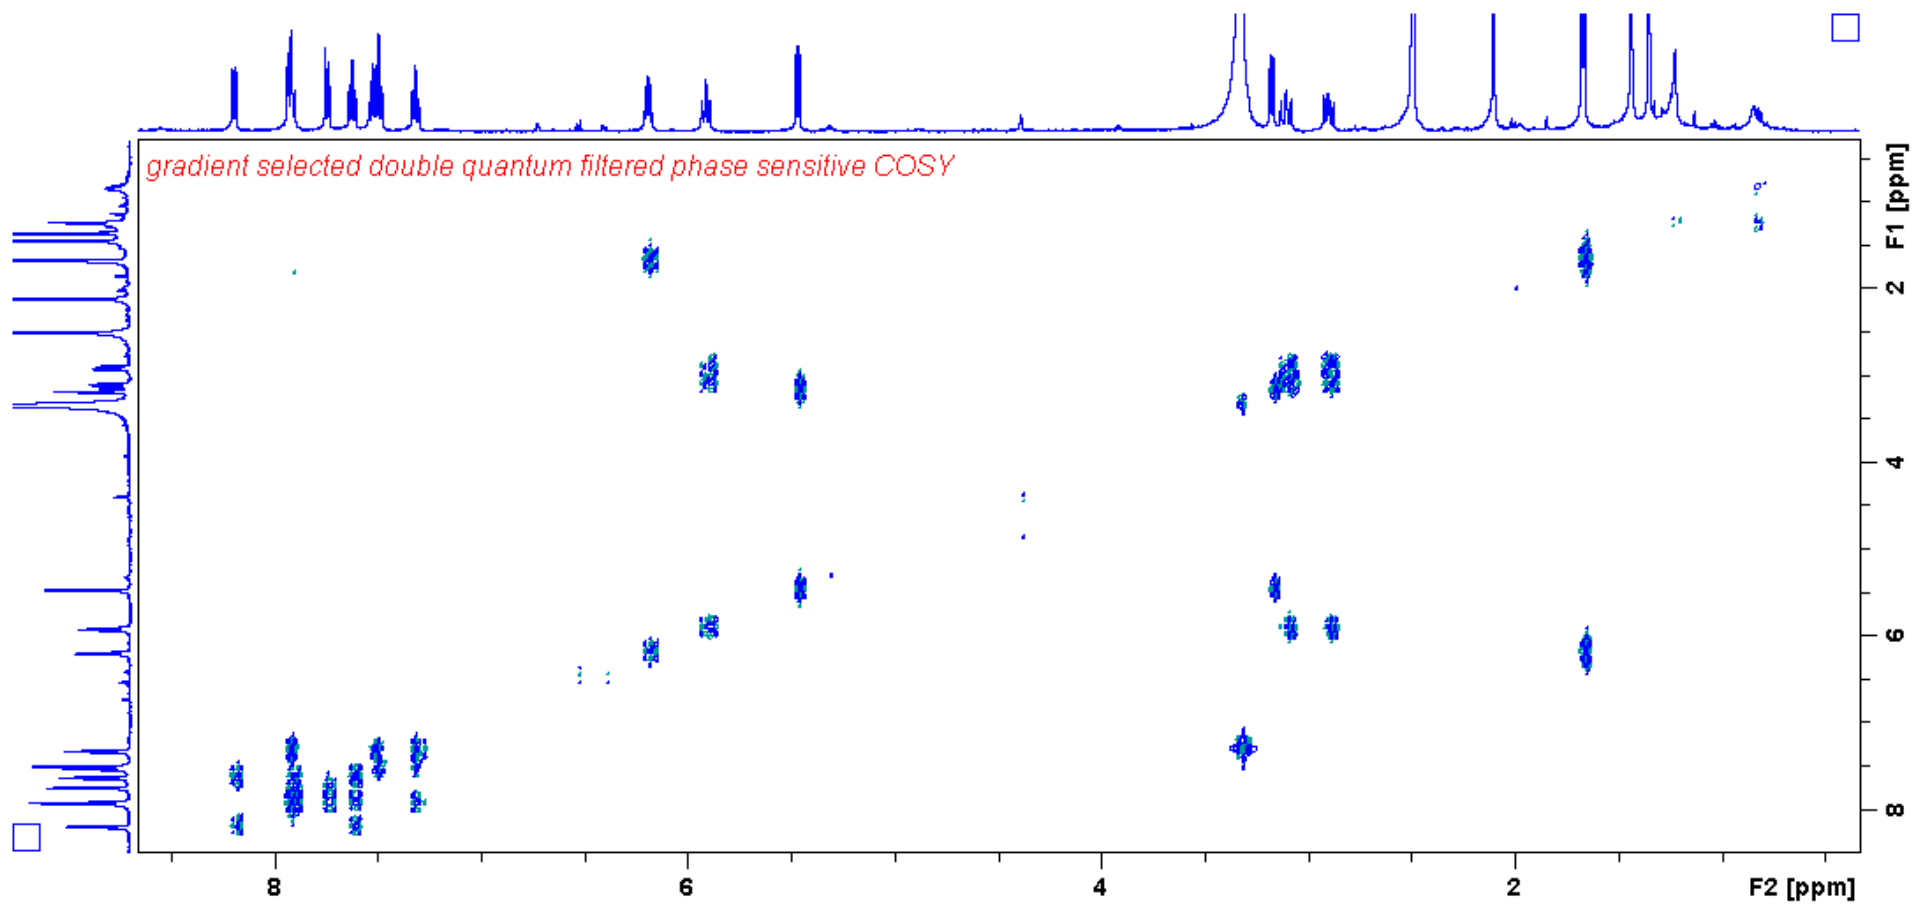

Figure S17.4  $^1\text{H}$ - $^1\text{H}$  COSY NMR spectrum of **28**

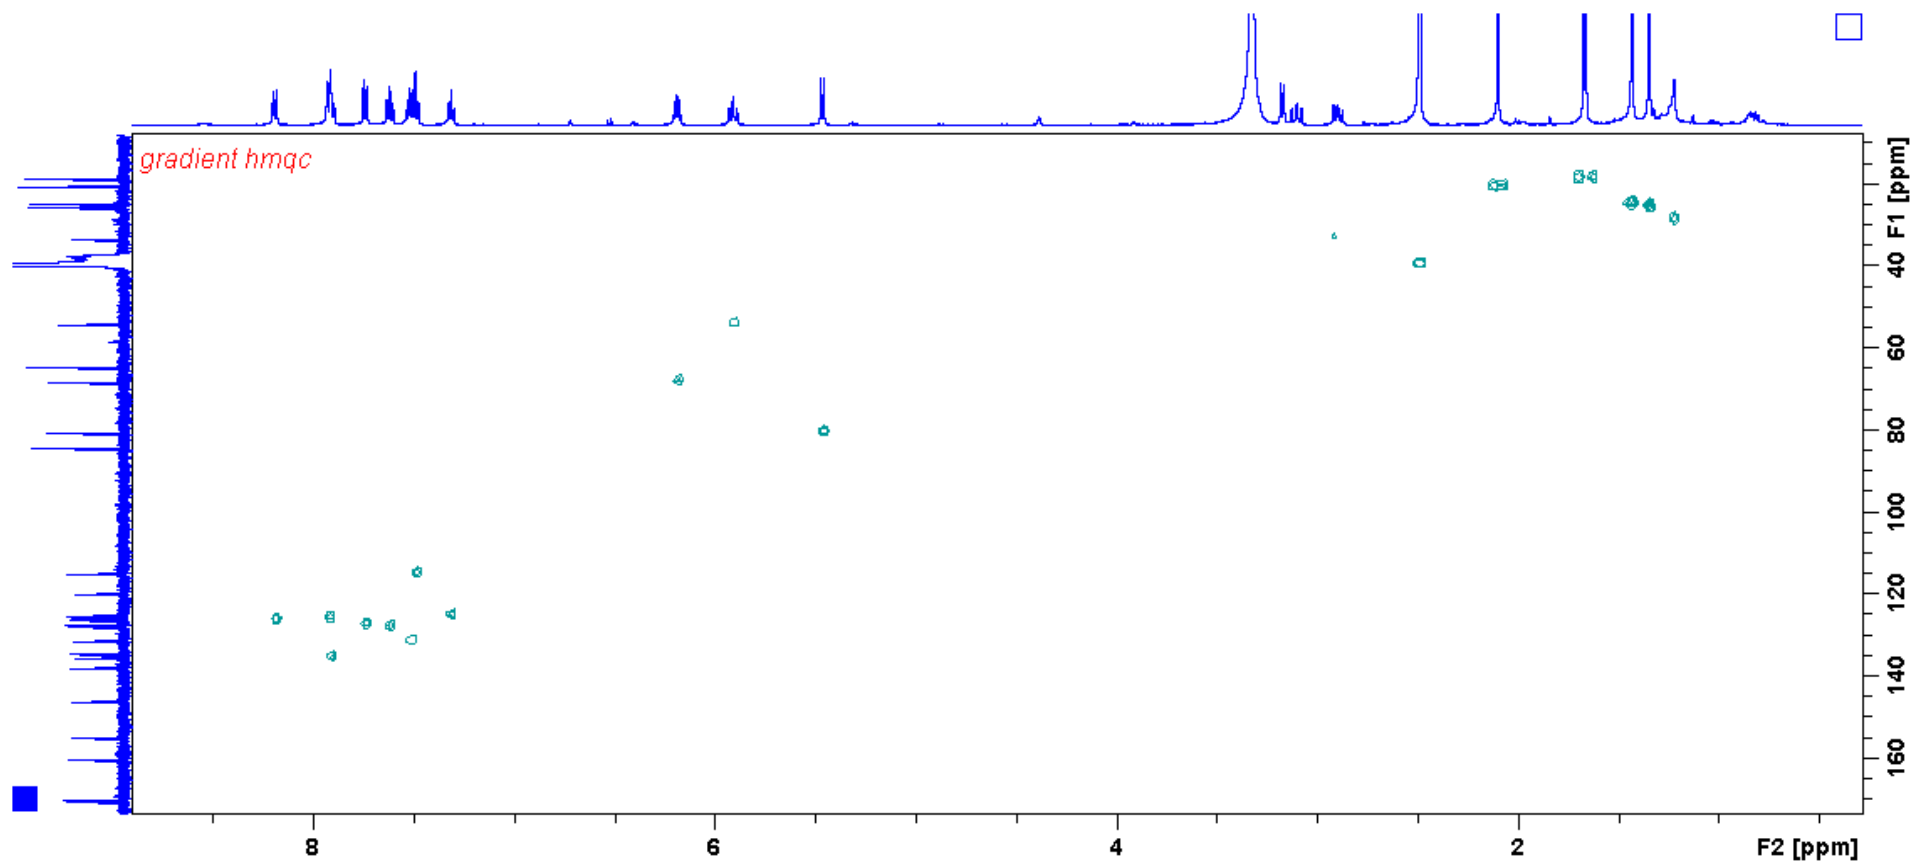

Figure S17.5  $^1\text{H}$ - $^{13}\text{C}$  MQC NMR spectrum of **28**.

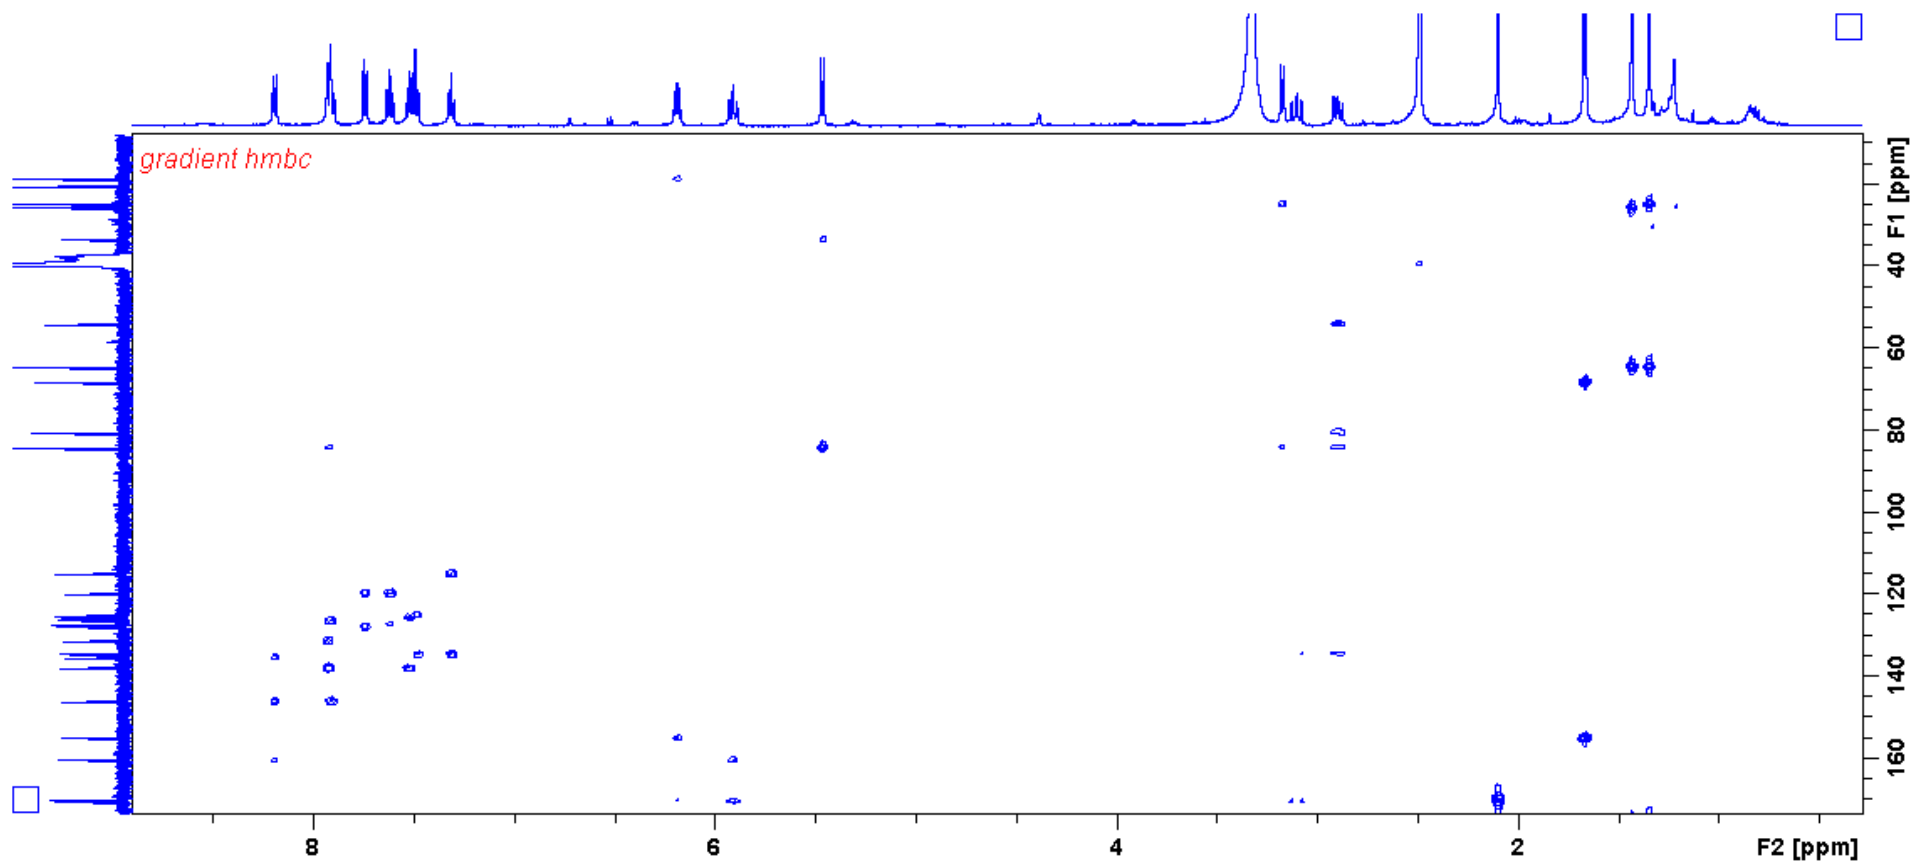

Figure S17.6  $^1\text{H}$ - $^{13}\text{C}$  HMBC NMR spectrum of **28**.



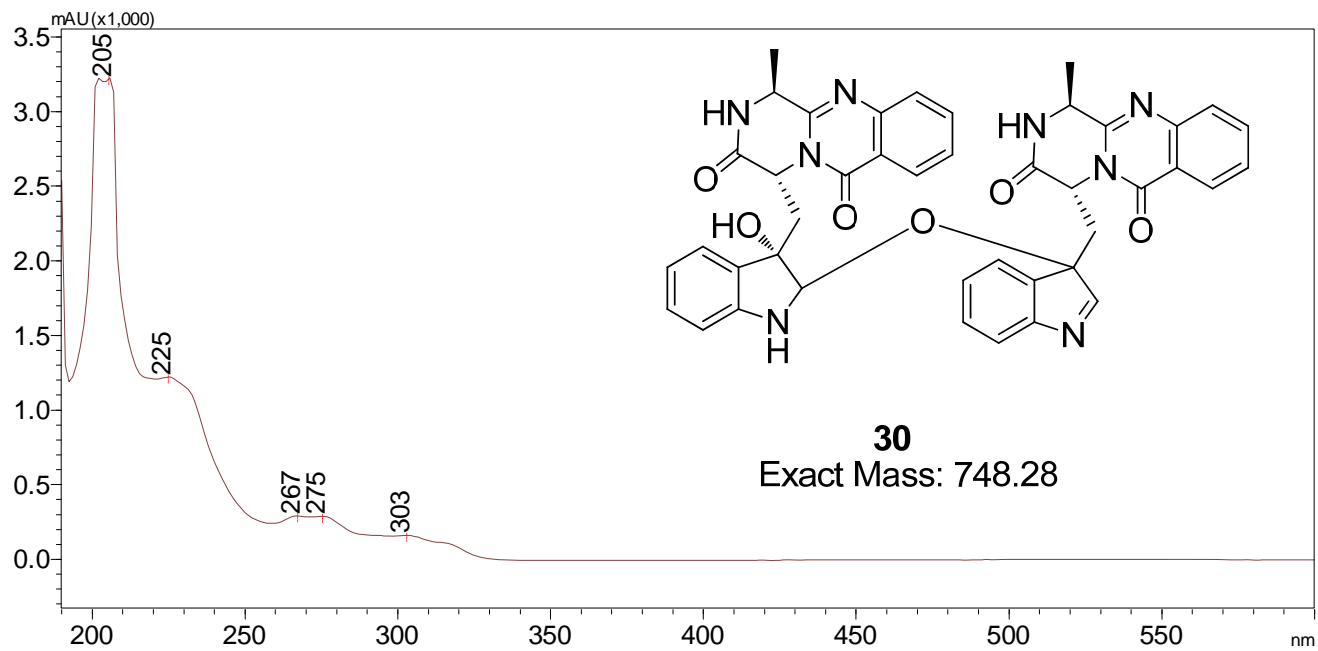

RT=25.8 min

T: + c ESI MS [200.00-1200.00]

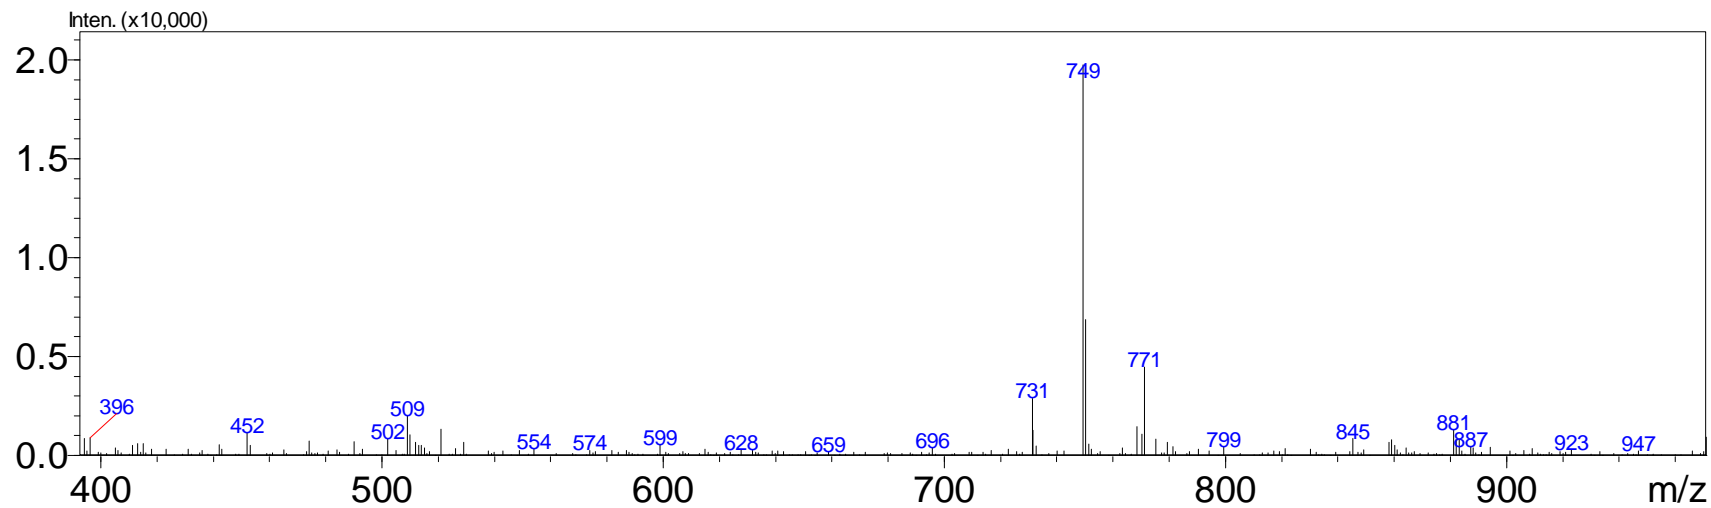

Figure S19 UV spectrum and MS Measured during LC-MS for **30**

## Supplementary reference

(41) Fedorova, N. D.; Khaldi, N.; Joardar, V. S.; Maiti, R.; Amedeo, P.; Anderson, M. J.; Crabtree, J.; Silva, J. C.; Badger, J. H.; Albarraq, A.; Angiuoli, S.; Bussey, H.; Bowyer, P.; Cotty, P. J.; Dyer, P. S.; Egan, A.; Galens, K.; Fraser-Liggett, C. M.; Haas, B. J.; Inman, J. M.; Kent, R.; Lemieux, S.; Malavazi, I.; Orvis, J.; Roemer, T.; Ronning, C. M.; Sundaram, J. P.; Sutton, G.; Turner, G.; Venter, J. C.; White, O. R.; Whitty, B. R.; Youngman, P.; Wolfe, K. H.; Goldman, G. H.; Wortman, J. R.; Jiang, B.; Denning, D. W.; Nierman, W. C. *PLoS Genet.* **2008**, *4*.
